# Supplementary material for: Palladium-catalyzed C–H activation of anisole with electron-deficient auxiliary ligands: a mechanistic investigation
Source: Royal Society of Chemistry journal article supplement (doi:10.1039/d0ob01133a), 2020-01-01
Supplement: d0ob01133a2.pdf [file d0ob01133a2.pdf]

Supporting Information

**Palladium Catalyzed C-H Activation of  
Anisole with Electron-deficient Auxiliary  
Ligands: a mechanistic investigation**

Xinyu Xu\*, Kezhi Chen

Department of Chemistry, Tsinghua University, Haidian, Beijing 100084,

People's Republic of China

xy-xu18@mails.tsinghua.edu.cn

## Computational Methods

All of the quantum chemical calculations in this work were performed with Gaussian 16 program<sup>S1</sup>. Single point energy calculations and geometry optimization were carried out at B3LYP-D3(BJ)/BS1-SMD(key words “eps=16.7, epsinf=1.631” were used)//B3LYP-D3(BJ)/BS2 level of theory<sup>S2-S4</sup>. The basis set BS1 was designed as SDD for Pd, Ag, I and 6-311++G(d,p) for other atoms, while BS2 was designed as SDD for Pd, Ag, I and 6-31G(d) for other atoms<sup>S5-S7</sup>. Several important conformations were evaluated manually. Frequency calculations (298.15K, ideal gas) were also performed to evaluate the nature of optimized structures. For transition states with one imaginary frequency, IRC calculations were also carried out to confirm its connectivity between corresponding substrates and products. Mulliken<sup>S8</sup> and NPA<sup>S9</sup> charge were calculated at the same level of geometry optimization through Gaussian program. Visualizations were completed through GaussView program<sup>S10</sup>. For linear free energy relationship, the  $\log(k/k_H)$  was calculated as follow (T=298.15K):

$$\log\left(\frac{k}{k_H}\right) = -\frac{\Delta G^* - \Delta G_H^*}{2.303RT}$$

In this equal, the  $\Delta G^*$  represents the free energy barrier of C-H activation transition state formation with a series of substituted substrates; the  $\Delta G_H^*$  represents the free energy barrier of C-H activation transition state formation with unsubstituted benzene substrate.

### Overall catalytic cycle of Yu's meta-arylation reaction

In this section, further discussions were performed to support our assignment of the rate-determine step. The free energy profile of the all catalytic cycle will be discussed stage by stage. The first stage, which bears an activation energy barrier as 22.74 kcal/mol (scheme S1), has been well discussed and analyzed in the main text.

#### (1) The first C-H activation

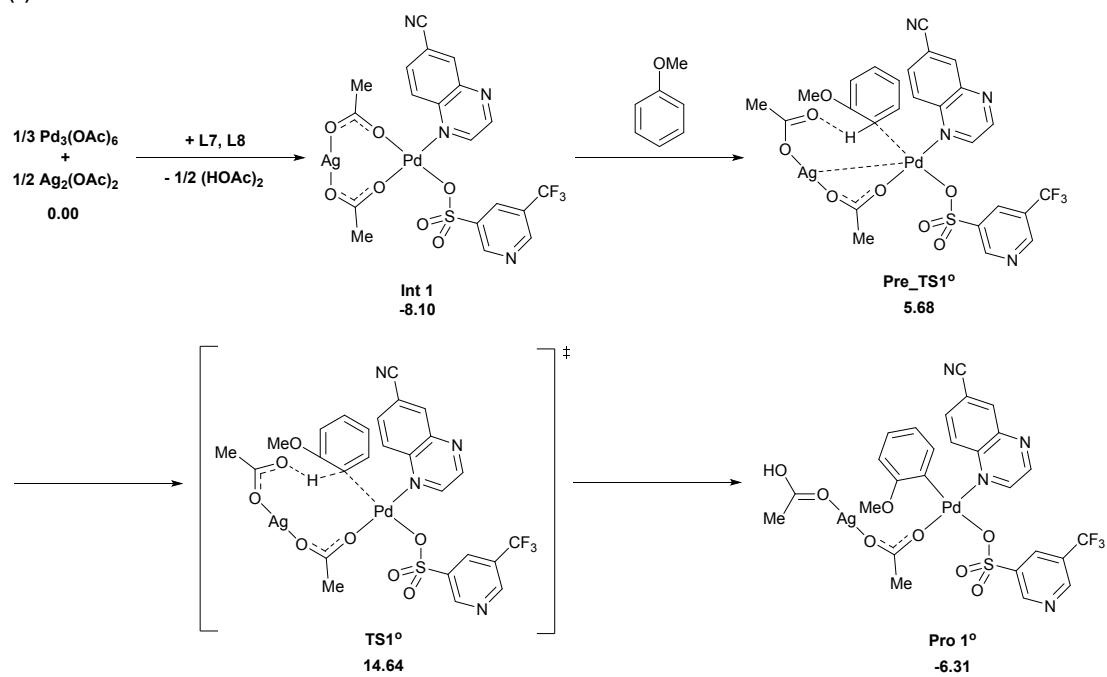

Scheme S1. The first C-H activation.

The second stage of the overall catalytic cycle is norbornene insertion and the second C-H activation (scheme S2), which forms the key palladacycle intermediate **Pro 6**. After the first C-H activation step, the norbornene co-catalyst substitutes the silver acetate and acetic acid to form **Pre\_TS5**. Then the norbornene co-catalyst insertion into C-Pd bond (via **TS5**) to afford the insertion product **Pro 5** and finally, isomerize to N-coordinated complex **iso\_Pro 5**. With the advance of one molecular of silver acetate, the second C-H activation step is facile and via a macrocyclic transition state **TS6**. The highest activation energy barrier of this stage is 15.72 kcal/mol ( $\Delta G_{\text{TS6}} - \Delta G_{\text{Pro 5}}$ ).

(2) Norbornene insertion and the second C-H activation

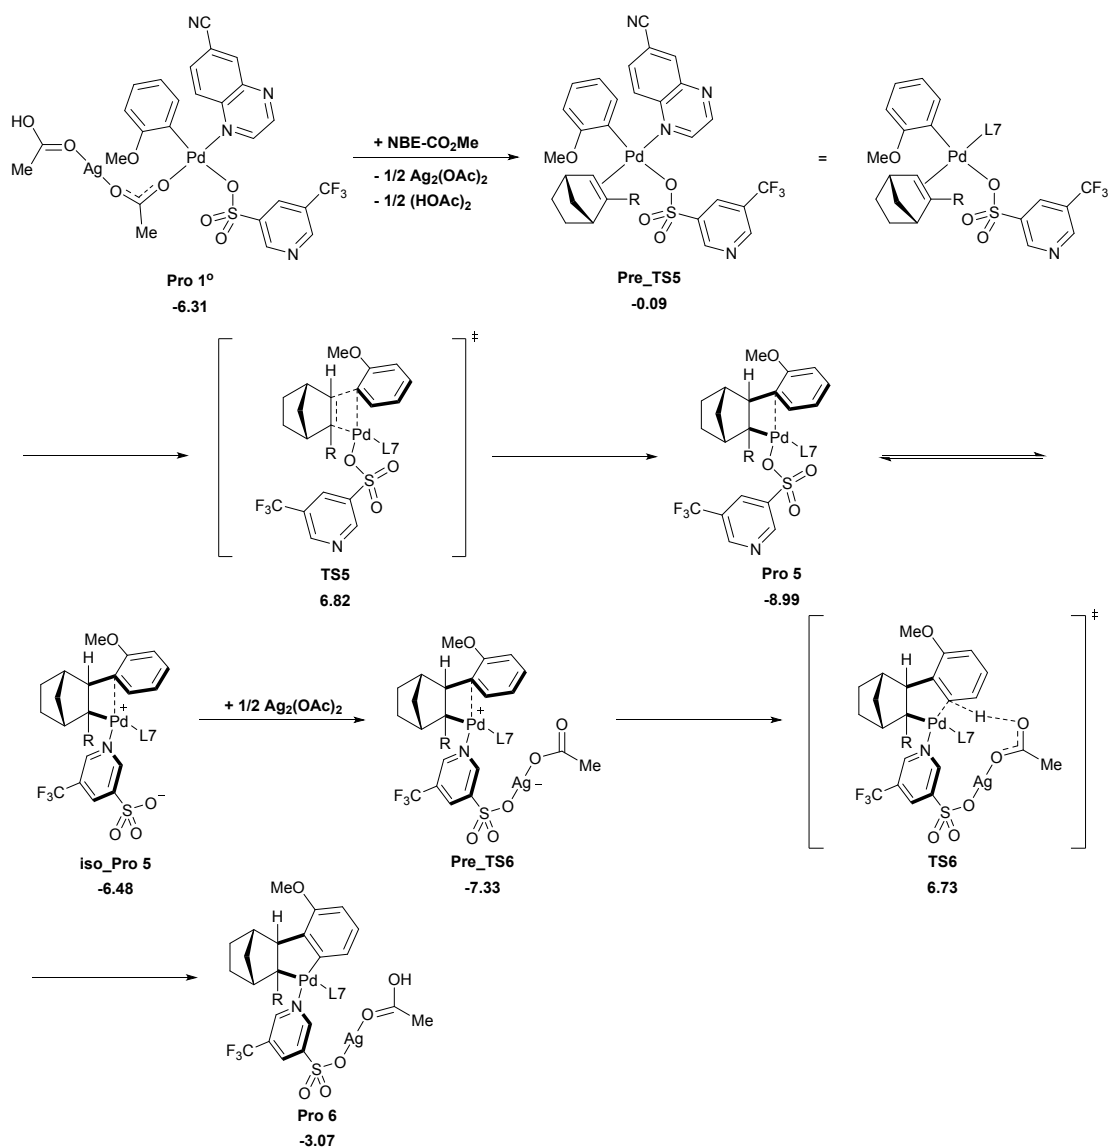

Scheme S2. Norbornene insertion and the second C-H activation (R = CO<sub>2</sub>Me; similar hereinafter).

The third stage is oxidative addition and reductive elimination (scheme S3), which achieves the C-C bond formation at the meta site of anisole. In this stage, the aryl iodide substrate coordinates with silver atom and then oxidative addition through a cyclic transition state **TS7**. Silver iodide extrusion and **L7** coordination offers the Pd (IV) intermediate **Pre\_TS8**. Finally, the highly exergonic reductive elimination step takes place to form the C-C bond formation product **Pro 8**. The highest energy transition state of this stage is the oxidative addition transition state **TS7**, which correspond to an energy barrier valued 21.73 kcal/mol ( $\Delta G_{TS7} - \Delta G_{Pro5}$ ).

(3) Oxidative addition and reductive elimination

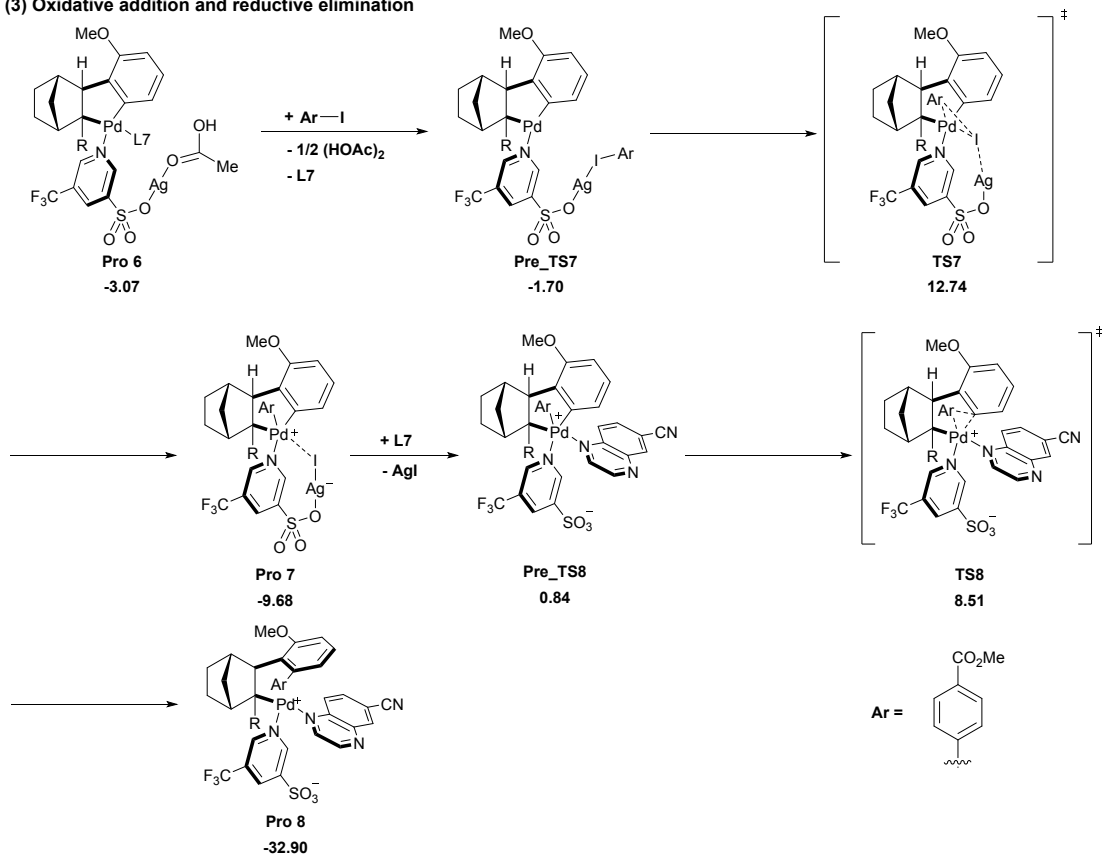

Scheme S3. Oxidative addition and reductive elimination.

The final stage is norbornene extrusion and protodemallation (scheme S4), which releases the coupling product and regenerates the activate catalyst. The highest activation energy barrier of this stage is 16.12 kcal/mol ( $\Delta G_{TS9} - \Delta G_{Pro8}$ ).

(4) Norbornene extrusion and protodemetalation

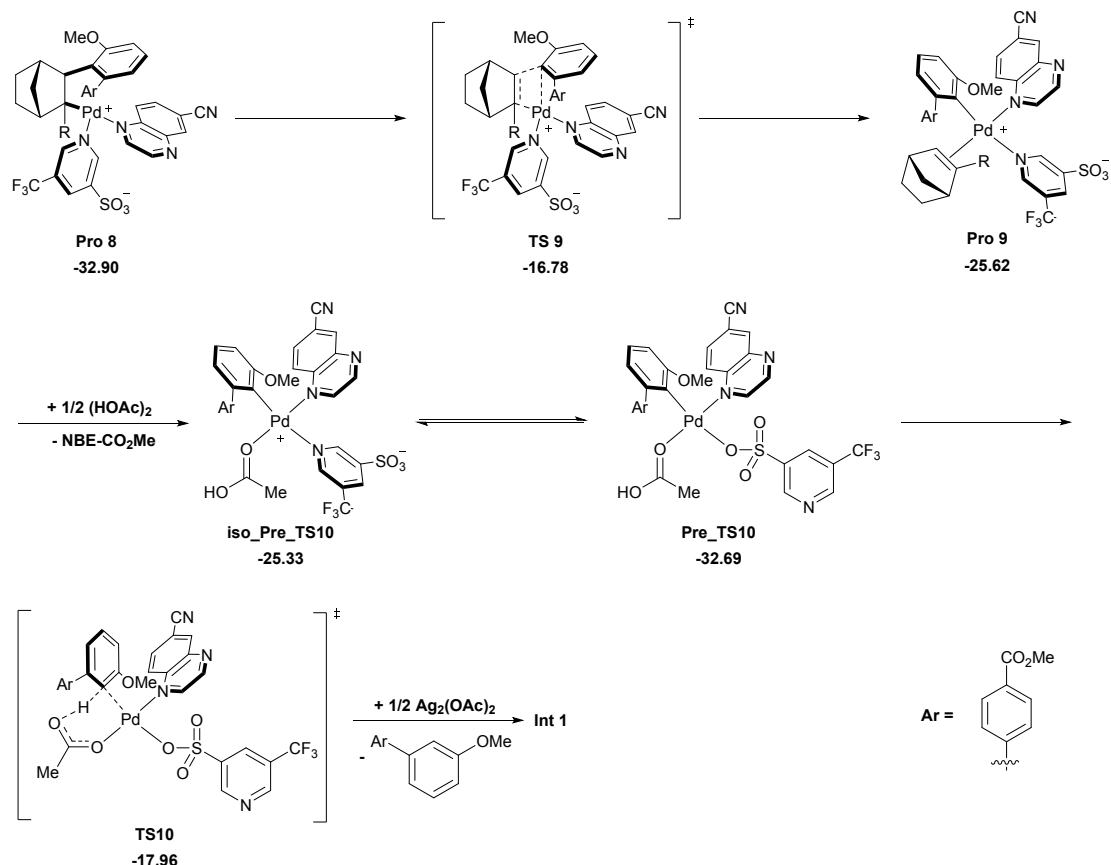

Scheme S4. Norbornene extrusion and protodemetalation.

The Gibbs free energy profile of the overall catalytic cycle was represented in scheme S5 (geometry structures of **TS5** – **TS10** can be found in figure S6); our calculation results supported that the first C-H activation step (22.74 kcal/mol) is the actual rate-determine step (although the activation energy barrier of oxidative addition is comparable; 21.73 kcal/mol) of this meta-arylation reaction and thus can have significant impact on the rate of desired product formation.

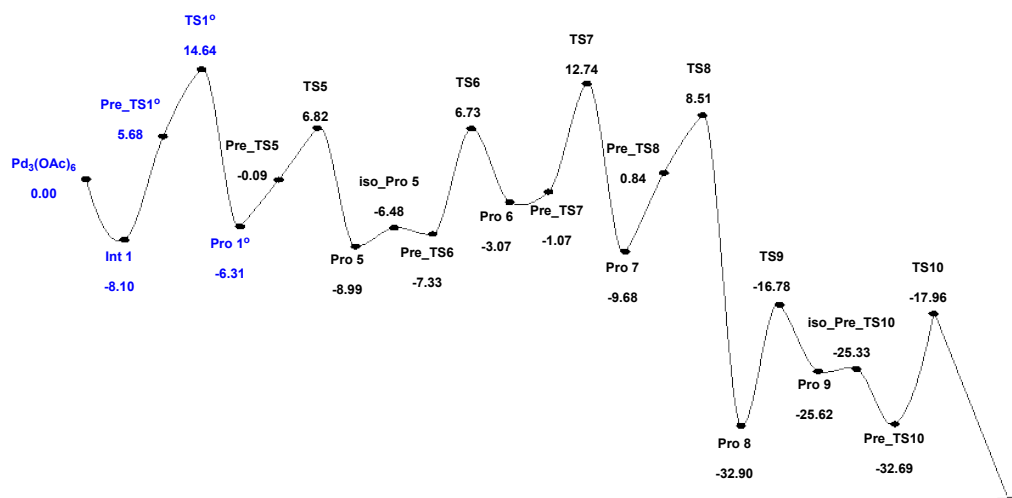

Scheme S5. The Gibbs free energy profile of the overall catalytic cycle.

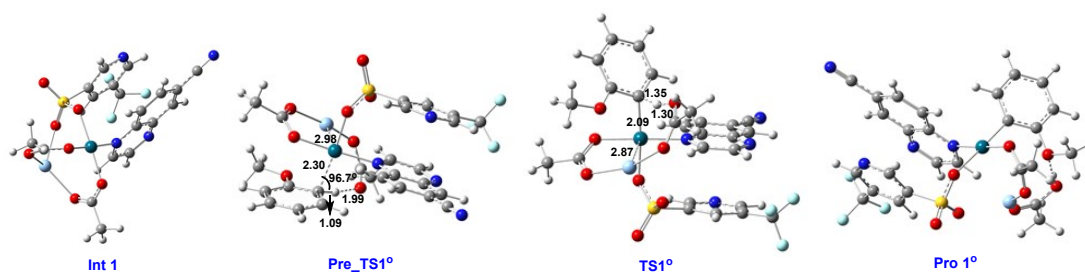

Figure S1. Geometry structures of **Int 1 – Pro 1°**.

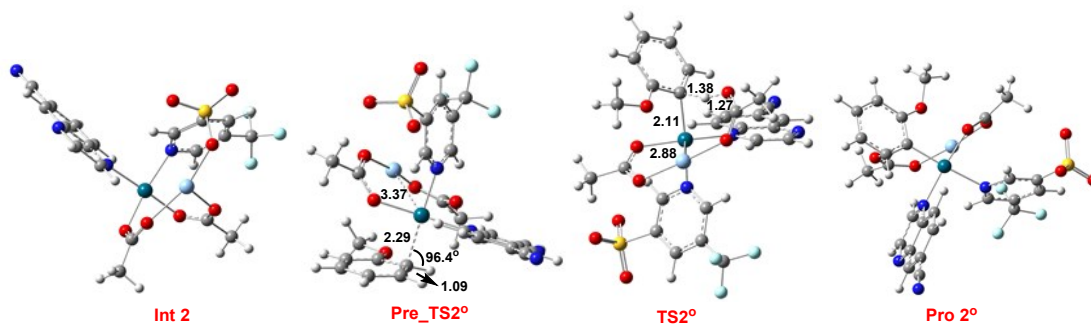

Figure S2. Geometry structures of **Int 2 – Pro 2°**.

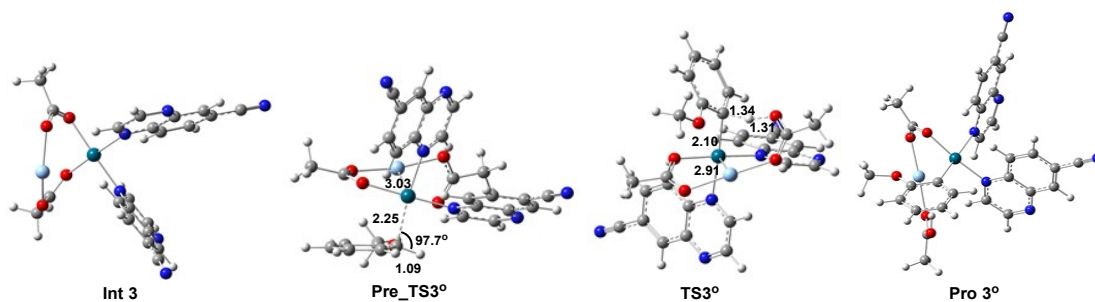

Figure S3. Geometry structures of **Int 3 – Pro 3°**.

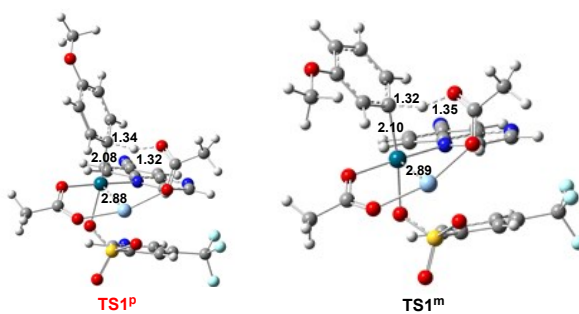

Figure S4. Geometry structures of **TS1<sup>m</sup>** and **TS1<sup>p</sup>**.

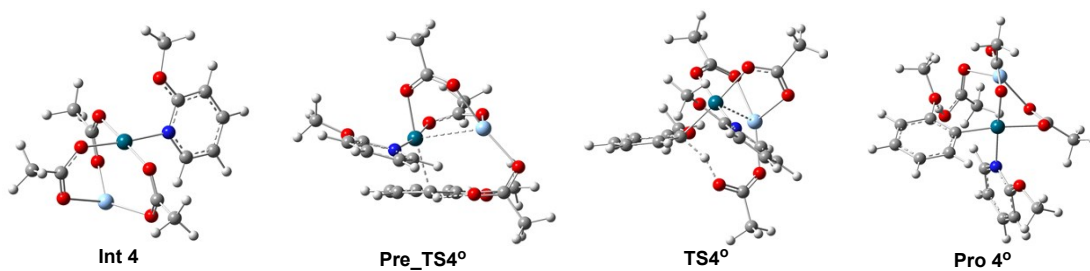

Figure S5. Geometry structures of **Int 4 – Pro 4°**.

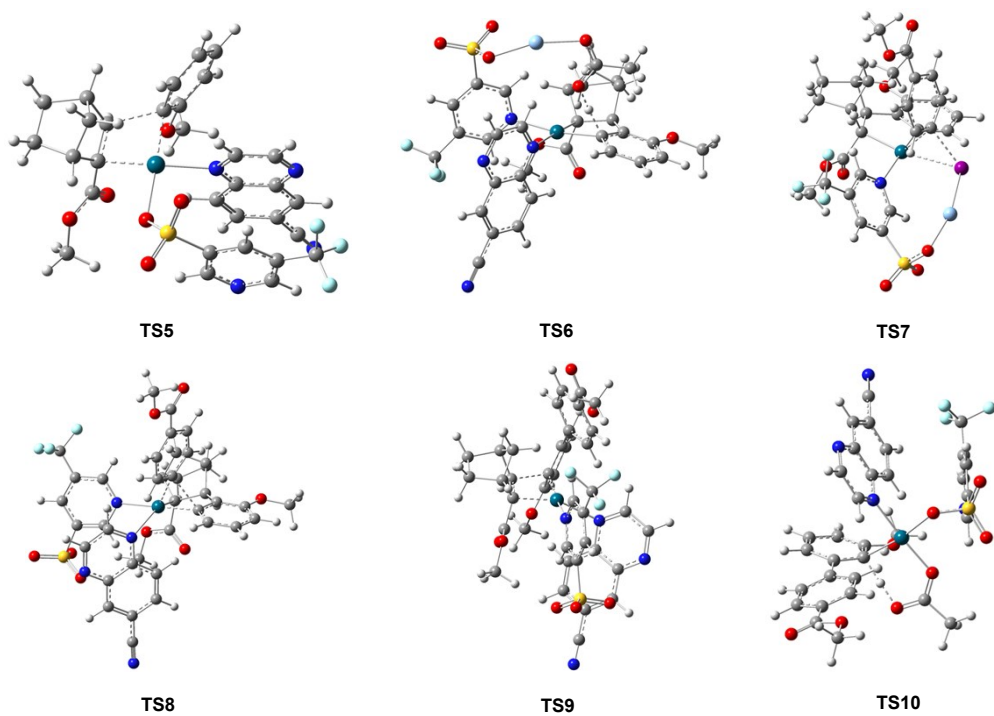

Figure S6. Geometry structures of **TS5 – TS10**.



**Table S1. Free energy barriers of C-H activation transition states formation with a series of substituted substrates (kcal/mol; for ligands L7/L8).**

| <b>R</b>        | <b>Free energy barrier</b> | <b><math>\sigma</math></b> | <b><math>\sigma^+</math></b> |
|-----------------|----------------------------|----------------------------|------------------------------|
| OMe             | 23.41                      | -0.27                      | -0.78                        |
| NHAc            | 24.16                      | 0                          | -0.60                        |
| Me              | 26.01                      | -0.14                      | -0.31                        |
| H               | 27.80                      | 0                          | 0                            |
| Cl              | 28.08                      | 0.24                       | 0.11                         |
| CN              | 30.53                      | 0.70                       | 0.66                         |
| NO <sub>2</sub> | 30.90                      | 0.81                       | 0.79                         |

**Table S2. Free energy barriers of C-H activation transition states formation with a series of substituted substrates (kcal/mol; for ligands L3).**

| <b>R</b>        | <b>Free energy barrier</b> | <b><math>\sigma</math></b> | <b><math>\sigma^+</math></b> |
|-----------------|----------------------------|----------------------------|------------------------------|
| OMe             | 27.19                      | -0.27                      | -0.78                        |
| NHAc            | 28.20                      | 0                          | -0.60                        |
| Me              | 29.01                      | -0.14                      | -0.31                        |
| H               | 30.15                      | 0                          | 0                            |
| Cl              | 29.46                      | 0.24                       | 0.11                         |
| CN              | 30.86                      | 0.70                       | 0.66                         |
| NO <sub>2</sub> | 30.96                      | 0.81                       | 0.79                         |

**Table S3. Calculated energies and imaginary frequencies**

| Stationary point                       | Single-point energy at B3LYP-D3(BJ)/BS1-SMD (in a.u.) (1) | Thermal correction to Gibbs free energy at B3LYP-D3(BJ)/BS2 (in a.u.) (2) | Gibbs free energies (G) (in a.u.) (3)=(1)+(2) | Imaginary frequencies |
|----------------------------------------|-----------------------------------------------------------|---------------------------------------------------------------------------|-----------------------------------------------|-----------------------|
| <b>Int 1</b>                           | -2451.483984                                              | 0.255135                                                                  | -2451.228849                                  |                       |
| <b>Pre_TS1<sup>o</sup></b>             | -2798.391759                                              | 0.379578                                                                  | -2798.012181                                  |                       |
| <b>TS1<sup>o</sup></b>                 | -2798.372269                                              | 0.37436                                                                   | -2797.997909                                  | -1289.14 <i>i</i>     |
| <b>Pro 1<sup>o</sup></b>               | -2798.410034                                              | 0.378737                                                                  | -2798.031297                                  |                       |
| <b>Int 2</b>                           | -2451.481202                                              | 0.254825                                                                  | -2451.226377                                  |                       |
| <b>Pre_TS2<sup>o</sup></b>             | -2798.389276                                              | 0.377824                                                                  | -2798.011452                                  |                       |
| <b>TS2<sup>o</sup></b>                 | -2798.367672                                              | 0.37278                                                                   | -2797.994892                                  | -1573.13 <i>i</i>     |
| <b>Pro 2<sup>o</sup></b>               | -2798.389641                                              | 0.375453                                                                  | -2798.014188                                  |                       |
| <b>Int 3</b>                           | -1752.862651                                              | 0.283631                                                                  | -1752.57902                                   |                       |
| <b>L8<sup>-</sup></b>                  | -1209.003787                                              | 0.055473                                                                  | -1208.948314                                  |                       |
| <b>Pre_TS3<sup>o</sup></b>             | -2099.775858                                              | 0.409962                                                                  | -2099.365896                                  |                       |
| <b>TS3<sup>o</sup></b>                 | -2099.753227                                              | 0.403009                                                                  | -2099.350218                                  | -1245.42 <i>i</i>     |
| <b>Pro 3<sup>o</sup></b>               | -2099.778096                                              | 0.406351                                                                  | -2099.371745                                  |                       |
| <b>Pd<sub>3</sub>(OAc)<sub>6</sub></b> | -1755.439642                                              | 0.244793                                                                  | -1755.194849                                  |                       |
| <b>Ag<sub>2</sub>(OAc)<sub>2</sub></b> | -751.278556                                               | 0.058278                                                                  | -751.220278                                   |                       |
| <b>(HOAc)<sub>2</sub></b>              | -458.386959                                               | 0.089612                                                                  | -458.297347                                   |                       |
| <b>L7</b>                              | -510.394046                                               | 0.088892                                                                  | -510.305154                                   |                       |
| <b>L8</b>                              | -1209.451881                                              | 0.067515                                                                  | -1209.384366                                  |                       |
| <b>Anisole</b>                         | -346.908134                                               | 0.102833                                                                  | -346.805301                                   |                       |
| <b>Pre_TS1<sup>m</sup></b>             | -2798.395075                                              | 0.378234                                                                  | -2798.016841                                  |                       |
| <b>TS1<sup>m</sup></b>                 | -2798.364082                                              | 0.37287                                                                   | -2797.991212                                  | -1131.76 <i>i</i>     |
| <b>Pro 1<sup>m</sup></b>               | -2798.404828                                              | 0.375779                                                                  | -2798.029049                                  |                       |
| <b>Pre_TS1<sup>p</sup></b>             | -2798.39609                                               | 0.377511                                                                  | -2798.018579                                  |                       |
| <b>TS1<sup>p</sup></b>                 | -2798.370084                                              | 0.373247                                                                  | -2797.996837                                  | -1222.15 <i>i</i>     |
| <b>Pro 1<sup>p</sup></b>               | -2798.402173                                              | 0.376175                                                                  | -2798.025998                                  |                       |
| <b>Int Pd1</b>                         | -1605.958590                                              | 0.285064                                                                  | -1605.673526                                  |                       |
| <b>Pre_TS<sup>Pd1</sup></b>            | -1442.448723                                              | 0.298179                                                                  | -1442.150544                                  |                       |
| <b>TS<sup>Pd1</sup></b>                | -1442.422696                                              | 0.293325                                                                  | -1442.129371                                  | -1195.79 <i>i</i>     |
| <b>Pro<sup>Pd1</sup></b>               | -1442.442356                                              | 0.297866                                                                  | -1442.14449                                   |                       |
| <b>Int Pd2</b>                         | -2191.117155                                              | 0.376350                                                                  | -2190.740805                                  |                       |
| <b>Pre_TS<sup>Pd2</sup></b>            | -2027.605887                                              | 0.387342                                                                  | -2027.218545                                  |                       |
| <b>TS<sup>Pd2</sup></b>                | -2027.584523                                              | 0.384315                                                                  | -2027.200208                                  | -1218.27 <i>i</i>     |
| <b>Pro<sup>Pd2</sup></b>               | -2027.609391                                              | 0.391095                                                                  | -2027.218296                                  |                       |
| <b>Int 4</b>                           | -1323.760567                                              | 0.217713                                                                  | -1323.542854                                  |                       |

|                             |              |          |              |                   |
|-----------------------------|--------------|----------|--------------|-------------------|
| <b>Pre_TS4°</b>             | -1670.667227 | 0.343617 | -1670.323610 |                   |
| <b>TS4°</b>                 | -1670.641636 | 0.337519 | -1670.304117 | -1412.69 <i>i</i> |
| <b>Pro 4°</b>               | -1670.671695 | 0.342581 | -1670.329114 |                   |
| <b>L3</b>                   | -362.958211  | 0.091129 | -362.867082  |                   |
| <b>TS1P_NHAc</b>            | -2891.908435 | 0.3899   | -2891.518535 | -1209.15 <i>i</i> |
| <b>TS1P_Me</b>              | -2723.134237 | 0.368076 | -2722.766161 | -1128.24 <i>i</i> |
| <b>TS1P_H</b>               | -2683.79756  | 0.343612 | -2683.453948 | -1110.37 <i>i</i> |
| <b>TS1P_Cl</b>              | -3143.425539 | 0.332038 | -3143.093501 | -1113.40 <i>i</i> |
| <b>TS1P_CN</b>              | -2776.070115 | 0.33958  | -2775.730535 | -1073.39 <i>i</i> |
| <b>TS1P_NO<sub>2</sub></b>  | -2888.366823 | 0.34206  | -2888.024763 | -1061.47 <i>i</i> |
| <b>TS4P</b>                 | -1670.639447 | 0.336049 | -1670.303398 | -1352.44 <i>i</i> |
| <b>TS4P_NHAc</b>            | -1764.178533 | 0.353863 | -1763.824670 | -1334.06 <i>i</i> |
| <b>TS4P_Me</b>              | -1595.404943 | 0.330984 | -1595.073959 | -1290.48 <i>i</i> |
| <b>TS4P_H</b>               | -1556.069389 | 0.306608 | -1555.762781 | -1273.26 <i>i</i> |
| <b>TS4P_Cl</b>              | -2015.698351 | 0.294471 | -2015.403880 | -1264.29 <i>i</i> |
| <b>TS4P_CN</b>              | -1648.344944 | 0.302358 | -1648.042586 | -1223.59 <i>i</i> |
| <b>TS4P_NO<sub>2</sub></b>  | -1760.642077 | 0.304824 | -1760.337253 | -1213.06 <i>i</i> |
| <b>PhNHAc</b>               | -440.448145  | 0.119963 | -440.328182  |                   |
| <b>PhMe</b>                 | -271.676611  | 0.097849 | -271.578762  |                   |
| <b>PhH</b>                  | -232.342796  | 0.073396 | -232.2694    |                   |
| <b>PhCl</b>                 | -691.97096   | 0.061552 | -691.909408  |                   |
| <b>PhCN</b>                 | -324.619621  | 0.069279 | -324.550342  |                   |
| <b>PhNO<sub>2</sub></b>     | -436.917125  | 0.071962 | -436.845163  |                   |
| <b>Pre_TS5</b>              | -2694.373456 | 0.465195 | -2693.908261 |                   |
| <b>TS5</b>                  | -2694.364539 | 0.467288 | -2693.897251 | -210.06 <i>i</i>  |
| <b>Pro 5</b>                | -2694.393604 | 0.471157 | -2693.922447 |                   |
| <b>iso_Pro 5</b>            | -2694.388635 | 0.470197 | -2693.918438 |                   |
| <b>Pre_TS6</b>              | -3070.041703 | 0.511775 | -3069.529928 |                   |
| <b>TS6</b>                  | -3070.012054 | 0.50453  | -3069.507524 | -1408.93 <i>i</i> |
| <b>Pro 6</b>                | -3070.032694 | 0.509543 | -3069.523151 |                   |
| <b>Pre_TS7</b>              | -2801.551046 | 0.460497 | -2801.090549 |                   |
| <b>TS7</b>                  | -2801.528356 | 0.460813 | -2801.067543 | -179.06 <i>i</i>  |
| <b>Pro 7</b>                | -2801.568005 | 0.464745 | -2801.10326  |                   |
| <b>Pre_TS8</b>              | -3153.433868 | 0.583183 | -3152.850685 |                   |
| <b>TS8</b>                  | -3153.417978 | 0.579528 | -3152.83845  | -80.46 <i>i</i>   |
| <b>Pro 8</b>                | -3153.48591  | 0.58146  | -3152.90445  |                   |
| <b>TS 9</b>                 | -3153.460935 | 0.582179 | -3152.878756 | -265.53 <i>i</i>  |
| <b>Pro 9</b>                | -3153.474453 | 0.581614 | -3152.892839 |                   |
| <b>iso_Pre_TS10</b>         | -2881.845186 | 0.449814 | -2881.395372 |                   |
| <b>Pre_TS10</b>             | -2881.857543 | 0.450443 | -2881.4071   |                   |
| <b>TS10</b>                 | -2881.828471 | 0.44485  | -2881.383621 | -1202.58 <i>i</i> |
| <b>(AgI)<sub>2</sub></b>    | -317.044774  | -0.03718 | -317.081954  |                   |
| <b>NBE-CO<sub>2</sub>Me</b> | -500.807392  | 0.161703 | -500.645689  |                   |

|            |             |          |             |  |
|------------|-------------|----------|-------------|--|
| <b>Arl</b> | -471.118572 | 0.095157 | -471.023415 |  |
|------------|-------------|----------|-------------|--|

## Reference

- S1. Gaussian 16, Revision A.03, M. J. Frisch, G. W. Trucks, H. B. Schlegel, G. E. Scuseria, M. A. Robb, J. R. Cheeseman, G. Scalmani, V. Barone, G. A. Petersson, H. Nakatsuji, X. Li, M. Caricato, A. V. Marenich, J. Bloino, B. G. Janesko, R. Gomperts, B. Mennucci, H. P. Hratchian, J. V. Ortiz, A. F. Izmaylov, J. L. Sonnenberg, D. Williams-Young, F. Ding, F. Lipparini, F. Egidi, J. Goings, B. Peng, A. Petrone, T. Henderson, D. Ranasinghe, V. G. Zakrzewski, J. Gao, N. Rega, G. Zheng, W. Liang, M. Hada, M. Ehara, K. Toyota, R. Fukuda, J. Hasegawa, M. Ishida, T. Nakajima, Y. Honda, O. Kitao, H. Nakai, T. Vreven, K. Throssell, J. A. Montgomery, Jr., J. E. Peralta, F. Ogliaro, M. J. Bearpark, J. J. Heyd, E. N. Brothers, K. N. Kudin, V. N. Staroverov, T. A. Keith, R. Kobayashi, J. Normand, K. Raghavachari, A. P. Rendell, J. C. Burant, S. S. Iyengar, J. Tomasi, M. Cossi, J. M. Millam, M. Klene, C. Adamo, R. Cammi, J. W. Ochterski, R. L. Martin, K. Morokuma, O. Farkas, J. B. Foresman, and D. J. Fox, Gaussian, Inc., Wallingford CT, 2016.
- S2. (a) Becke, A. D. Density-functional thermochemistry. III. The role of exact exchange. *J. Chem. Phys.* **1993**, 98, 5648-5652 (b) Lee, C.; Yang, W.; Parr, R. G. Development of the Colle-Salvetti correlation-energy formula into a functional of the electron density. *Phys. Rev. B: Condens. Matter Mater. Phys.* **1988**, 37, 785-789.
- S3. (a) Grimme, S.; Antony, J.; Ehrlich, S.; Krieg, H. A consistent and accurate ab initio parametrization of density functional dispersion correction (DFT-D) for the 94 elements H-Pu. *J. Chem. Phys.* **2010**, 132, 154104-154119. (b) Grimme, S.; Ehrlich, S.; Goerigk, L. Effect of the damping function in dispersion corrected density functional theory. *J. Comput. Chem.* **2011**, 32, 1456-1465.
- S4. Marenich A. V.; Cramer C. J.; Truhlar D. G. Universal solvation model based on solute electron density and on a continuum model of the solvent defined by the bulk dielectric constant and atomic surface tensions. *J. Phys. Chem. B* **2009**, 113, 6378-6396.
- S5. (a) Dolg, M.; Wedig, U.; Stoll, H.; Preuss, H. Energy-adjusted ab initio pseudopotentials for the first row transition elements. *J. Chem. Phys.* **1987**, 86, 866. (b) Andrae, D.; Häußermann, U.; Dolg, M.; Stoll, H.; Preuß, H. Energy-adjusted ab initio pseudopotentials for the second and third row transition elements. *Theor. Chem. Acc.* **1990**, 77, 123.
- S6. Krishnan, R.; Binkley, J. S.; Seeger, R.; Pople, J. A. Self-consistent molecular orbital methods. XX. A basis set for correlated wave functions. *J. Chem. Phys.* **1980**, 72, 650.
- S7. (a) Ditchfield, R.; Hehre, W. J.; Pople, J. A. Self-Consistent Molecular-Orbital Methods. IX. An Extended Gaussian-Type Basis for Molecular-Orbital Studies of Organic Molecules. *J. Chem. Phys.* **1971**, 54, 724. (b) Hehre, W. J.; Ditchfield, R.; Pople, J. A. Self-Consistent Molecular Orbital Methods. XII. Further Extensions of Gaussian-Type Basis Sets for Use in Molecular Orbital Studies of Organic Molecules. *J. Chem. Phys.* **1972**, 56, 2257. (c) Hariharan, P. C.; Pople, J. A. The influence of polarization functions on molecular orbital hydrogenation energies. *Theor. Chim. Acta.* **1973**, 28, 213.
- S8. (a) Mulliken R. S. Electronic population analysis on LCAO-MO molecular wave functions. I. *J. Chem. Phys.* **1955**, 23, 1833-1840. (b) Mulliken R. S. Electronic population analysis on LCAO-MO molecular wave functions. II. Overlap populations, bond orders, and covalent bond energies. *J. Chem. Phys.* **1955**, 23, 1841-1846. (c) Mulliken R. S. Electronic population analysis on LCAO-MO molecular wave functions. III. Effects of hybridization on overlap and gross AO populations. *J. Chem. Phys.* **1955**, 23, 2338-2342.
- S9. Reed A. E., Weinstock R. B., Weinhold F. Natural population analysis. *J. Chem. Phys.* **1985**,

83, 735-746.

S10. Roy D., Keith T. A., Millam J. M. Current version: GaussView, Version 6. **2016.**

## Cartesian coordinate of optimized structures

Int 1

0 1

|    |             |             |             |
|----|-------------|-------------|-------------|
| Pd | -1.59125300 | 1.03019000  | -0.01026100 |
| O  | -3.25600000 | 1.49236500  | -1.04903100 |
| C  | -4.08799200 | 0.64774800  | -1.55632200 |
| O  | -4.16995900 | -0.57335200 | -1.30169300 |
| Ag | -2.92504600 | -1.47413700 | 0.32981000  |
| O  | -2.86005000 | -0.48994500 | 2.39998600  |
| C  | -2.91013700 | 0.75818100  | 2.54244900  |
| O  | -2.46744400 | 1.63878700  | 1.71460500  |
| C  | -3.55454100 | 1.32538900  | 3.79036100  |
| H  | -3.23910000 | 2.35471100  | 3.96801900  |
| H  | -4.64184400 | 1.31071900  | 3.65171000  |
| H  | -3.31918900 | 0.69324800  | 4.64981700  |
| C  | -5.02894300 | 1.24824400  | -2.58187000 |
| H  | -5.94063400 | 0.65204500  | -2.64924600 |
| H  | -5.26110200 | 2.28674300  | -2.33654700 |
| H  | -4.52695800 | 1.23193100  | -3.55621600 |
| N  | 0.19549000  | 0.74727000  | 0.97657300  |
| C  | 1.31393800  | 1.46348500  | 0.63015100  |
| C  | 0.30380200  | -0.18705900 | 1.90906600  |
| C  | 1.26376100  | 2.47487300  | -0.35868700 |
| C  | 2.55070000  | 1.16564900  | 1.28166600  |
| C  | 1.54712900  | -0.45331100 | 2.53374700  |
| H  | -0.59729900 | -0.72726600 | 2.17386700  |
| C  | 2.40897900  | 3.15224300  | -0.69862400 |
| H  | 0.32076700  | 2.68904800  | -0.84856900 |
| C  | 3.71711900  | 1.87602500  | 0.91484800  |
| N  | 2.64774700  | 0.19929400  | 2.23395200  |
| H  | 1.61237100  | -1.23787700 | 3.28215600  |
| C  | 3.64898900  | 2.84982600  | -0.06401200 |
| H  | 2.38389200  | 3.92053600  | -1.46303400 |
| H  | 4.64767900  | 1.62035300  | 1.40757200  |
| C  | 4.83100200  | 3.55786500  | -0.45569100 |
| N  | 5.78655900  | 4.13685600  | -0.77590400 |
| O  | -0.75107700 | 0.35986200  | -1.77260300 |
| S  | -0.30493800 | -1.11554300 | -1.89145700 |
| C  | 1.46166900  | -1.01088000 | -1.59749500 |
| O  | -0.51869400 | -1.60763200 | -3.24840100 |
| O  | -0.81540200 | -1.94753500 | -0.76030900 |
| C  | 2.23506600  | -0.09838000 | -2.32225900 |
| C  | 2.06353500  | -1.80514800 | -0.63007600 |

|   |            |             |             |
|---|------------|-------------|-------------|
| N | 3.54396000 | 0.06455900  | -2.11318100 |
| H | 1.77512200 | 0.53123200  | -3.07869000 |
| C | 3.42853900 | -1.63225200 | -0.40809800 |
| H | 1.47425000 | -2.50897400 | -0.05526200 |
| C | 4.12179700 | -0.68941200 | -1.17089900 |
| C | 4.14931800 | -2.43388200 | 0.63957900  |
| H | 5.18227200 | -0.52176100 | -1.00299800 |
| F | 3.29714000 | -2.88117400 | 1.59160700  |
| F | 4.75909300 | -3.51427700 | 0.11229500  |
| F | 5.09864500 | -1.69585600 | 1.25100400  |

Pre\_TS1°

0 1

|    |             |             |             |
|----|-------------|-------------|-------------|
| C  | -3.67618500 | 1.15585400  | 1.35200000  |
| C  | -4.34069500 | 2.32364600  | 0.99438300  |
| C  | -3.63291200 | 3.53392700  | 0.94922700  |
| C  | -2.28389100 | 3.60926600  | 1.27842400  |
| C  | -1.61269400 | 2.43932500  | 1.65879700  |
| H  | -5.39570200 | 2.31298000  | 0.75011900  |
| H  | -1.76179900 | 4.55978400  | 1.26110200  |
| H  | -0.59618500 | 2.49458600  | 2.03426800  |
| C  | -2.27777800 | 1.18435900  | 1.65857600  |
| H  | -1.86878800 | 0.30163200  | 2.15654200  |
| Pd | -1.10150600 | 0.95375700  | -0.30392500 |
| O  | -2.63829300 | 1.61638300  | -1.41961900 |
| C  | -3.40395200 | 0.77793100  | -2.02398800 |
| O  | -3.48990100 | -0.45028300 | -1.79407600 |
| Ag | -2.48865100 | -1.68574400 | -0.30303400 |
| O  | -1.96537000 | -2.98718900 | 1.29001000  |
| C  | -1.75137500 | -2.63060500 | 2.51265100  |
| O  | -1.43269700 | -1.48859900 | 2.89789000  |
| C  | -1.89405700 | -3.75967600 | 3.52640600  |
| H  | -1.52963200 | -3.44805100 | 4.50719100  |
| H  | -2.95118700 | -4.03818100 | 3.60609600  |
| H  | -1.35310900 | -4.64725500 | 3.18388000  |
| C  | -4.25842800 | 1.38091200  | -3.11631400 |
| H  | -5.13543400 | 0.75761600  | -3.29994000 |
| H  | -4.55174700 | 2.40172100  | -2.86077900 |
| H  | -3.65859100 | 1.42055800  | -4.03282200 |
| H  | -4.16467500 | 4.43585200  | 0.65982400  |
| O  | -4.24947800 | -0.05729300 | 1.45365300  |
| C  | -5.59536200 | -0.22346300 | 1.01015100  |
| H  | -6.28516800 | 0.37309400  | 1.61778100  |
| H  | -5.68563300 | 0.04676500  | -0.04726200 |



|   |             |             |             |
|---|-------------|-------------|-------------|
| H | -5.81331100 | -1.28333900 | 1.13754300  |
| N | 0.58107300  | 0.34328000  | 0.71461600  |
| C | 1.66110900  | 1.17799900  | 0.88713400  |
| C | 0.65031500  | -0.89197700 | 1.17999700  |
| C | 1.68817800  | 2.47327300  | 0.32219600  |
| C | 2.79071000  | 0.69574400  | 1.61281400  |
| C | 1.78126800  | -1.32276500 | 1.92673900  |
| H | -0.16425800 | -1.56541500 | 0.96874200  |
| C | 2.80739300  | 3.25896500  | 0.46519500  |
| H | 0.83586100  | 2.81461200  | -0.25571700 |
| C | 3.92727000  | 1.52190700  | 1.75570200  |
| N | 2.81958600  | -0.55666100 | 2.15259600  |
| H | 1.79151800  | -2.33183600 | 2.32714800  |
| C | 3.93822500  | 2.78440400  | 1.18733700  |
| H | 2.84752300  | 4.24315300  | 0.01242600  |
| H | 4.78142700  | 1.12655100  | 2.29248800  |
| C | 5.09646500  | 3.61862500  | 1.30824000  |
| N | 6.03128700  | 4.30281100  | 1.40400200  |
| N | 4.03645400  | 0.99038300  | -1.95527200 |
| C | 2.78777100  | 0.70929000  | -2.34148700 |
| C | 4.67988700  | 0.07269400  | -1.22653000 |
| C | 2.14302700  | -0.48639300 | -2.01269000 |
| H | 2.26608900  | 1.47133300  | -2.91324900 |
| C | 4.11809900  | -1.15506100 | -0.86379500 |
| H | 5.68338100  | 0.33264600  | -0.89985000 |
| C | 2.81957400  | -1.44951200 | -1.27386400 |
| S | 0.43183100  | -0.74583900 | -2.49560200 |
| C | 4.91083400  | -2.12011800 | -0.02721100 |
| H | 2.32957200  | -2.37702400 | -1.00220600 |
| O | 0.38818300  | -0.92962400 | -3.94483500 |
| O | -0.07136500 | -1.83010500 | -1.62357500 |
| O | -0.20595900 | 0.62242600  | -2.13227700 |
| F | 5.80719400  | -2.80429300 | -0.76677900 |
| F | 4.11279600  | -3.02588900 | 0.57858900  |
| F | 5.60333100  | -1.47058700 | 0.93485200  |

TS1°

0 1

|   |             |            |            |
|---|-------------|------------|------------|
| C | -3.74120100 | 1.57542600 | 0.56050400 |
| C | -4.54809600 | 2.71679200 | 0.60465700 |
| C | -3.95424500 | 3.96274300 | 0.80167100 |
| C | -2.57247000 | 4.09238600 | 0.98530800 |
| C | -1.78224800 | 2.95261000 | 0.93962400 |
| H | -5.62311900 | 2.64768000 | 0.48911000 |

|    |             |             |             |
|----|-------------|-------------|-------------|
| H  | -2.13141000 | 5.06898400  | 1.15786900  |
| H  | -0.71077800 | 3.04625600  | 1.09229400  |
| C  | -2.32443300 | 1.65978800  | 0.71562400  |
| H  | -2.03708700 | 0.81110600  | 1.72032600  |
| Pd | -1.14359600 | 0.57314700  | -0.62445800 |
| O  | -2.66072500 | 0.59006700  | -1.97392100 |
| C  | -3.23595400 | -0.49088200 | -2.36290700 |
| O  | -3.20912000 | -1.60779500 | -1.79426100 |
| Ag | -2.34177200 | -1.89970300 | 0.19956800  |
| O  | -2.10303700 | -1.88433400 | 2.37700500  |
| C  | -2.12741200 | -0.92676800 | 3.19211700  |
| O  | -1.94950200 | 0.31312300  | 2.91926700  |
| C  | -2.37255600 | -1.24051400 | 4.65577600  |
| H  | -1.77549500 | -0.58469200 | 5.29413000  |
| H  | -3.42885600 | -1.05072200 | 4.88056800  |
| H  | -2.15442500 | -2.28942400 | 4.86383900  |
| C  | -4.00380600 | -0.36352100 | -3.66299700 |
| H  | -4.81290200 | -1.09568500 | -3.70018400 |
| H  | -4.38910800 | 0.65028700  | -3.79309000 |
| H  | -3.31096000 | -0.57251300 | -4.48629800 |
| H  | -4.58627600 | 4.84638600  | 0.82711500  |
| O  | -4.23375000 | 0.32565800  | 0.43835200  |
| C  | -5.61403200 | 0.13484500  | 0.14773300  |
| H  | -6.24525300 | 0.47767000  | 0.97571500  |
| H  | -5.89103300 | 0.65931900  | -0.77366800 |
| H  | -5.73481300 | -0.93921700 | 0.00862400  |
| N  | 0.53431900  | 0.63914900  | 0.57638700  |
| C  | 1.56328700  | 1.50401100  | 0.29144800  |
| C  | 0.70236500  | -0.23553900 | 1.55424900  |
| C  | 1.47529800  | 2.41509000  | -0.78729200 |
| C  | 2.75048900  | 1.45215700  | 1.08322600  |
| C  | 1.88863700  | -0.24642900 | 2.33085600  |
| H  | -0.08618100 | -0.95233300 | 1.72959300  |
| C  | 2.53964300  | 3.23357000  | -1.07804300 |
| H  | 0.57244900  | 2.42974700  | -1.38899600 |
| C  | 3.83066100  | 2.30893500  | 0.77140700  |
| N  | 2.88847400  | 0.57705700  | 2.11697000  |
| H  | 1.99362700  | -0.97333700 | 3.13111700  |
| C  | 3.72986100  | 3.18224400  | -0.29639500 |
| H  | 2.49001600  | 3.92026900  | -1.91547800 |
| H  | 4.72927200  | 2.23766900  | 1.37275800  |
| C  | 4.82877400  | 4.03815700  | -0.63094300 |
| N  | 5.71448400  | 4.73941000  | -0.90454700 |
| N  | 4.16060100  | 0.13701400  | -2.03207900 |

|   |             |             |             |
|---|-------------|-------------|-------------|
| C | 2.92573100  | -0.31469100 | -2.27104700 |
| C | 4.81309400  | -0.37047100 | -0.98018200 |
| C | 2.30251700  | -1.28194500 | -1.47534300 |
| H | 2.39474500  | 0.12336500  | -3.11101700 |
| C | 4.27186800  | -1.34297700 | -0.13600900 |
| H | 5.80472600  | 0.03069100  | -0.78823700 |
| C | 2.98797700  | -1.82072100 | -0.39441400 |
| S | 0.60979900  | -1.77940000 | -1.82669000 |
| C | 5.06082500  | -1.84141300 | 1.04145600  |
| H | 2.51323000  | -2.55793100 | 0.24212600  |
| O | 0.62583700  | -2.64298100 | -3.00656100 |
| O | 0.11169200  | -2.36340000 | -0.54984000 |
| O | -0.05466200 | -0.42818600 | -2.13333300 |
| F | 5.92086100  | -2.82068100 | 0.69373000  |
| F | 4.25195900  | -2.34395900 | 2.00283600  |
| F | 5.78996600  | -0.84923000 | 1.59598400  |

Pro\_1°

0 1

|    |             |             |             |
|----|-------------|-------------|-------------|
| C  | -3.20467300 | 1.76259400  | 1.12982100  |
| C  | -3.79797900 | 2.56836000  | 2.10376400  |
| C  | -3.16093300 | 3.73590400  | 2.51868700  |
| C  | -1.93030900 | 4.08013900  | 1.95861700  |
| C  | -1.34185800 | 3.25042500  | 1.00116600  |
| H  | -4.75091600 | 2.27278800  | 2.53410700  |
| H  | -1.42316200 | 4.98963100  | 2.26868200  |
| H  | -0.37822800 | 3.53293000  | 0.58642000  |
| C  | -1.96563000 | 2.07139700  | 0.56232100  |
| H  | -3.93209500 | -0.51440700 | 1.96698400  |
| Pd | -1.05072200 | 0.91272800  | -0.77318600 |
| O  | -2.54515700 | 1.17266100  | -2.14071100 |
| C  | -3.23906900 | 0.21180700  | -2.62957300 |
| O  | -3.39009400 | -0.93762000 | -2.14693700 |
| Ag | -2.37176900 | -1.61938300 | -0.31457100 |
| O  | -2.23884500 | -2.19894700 | 1.91812400  |
| C  | -3.05379700 | -2.00577300 | 2.82601400  |
| O  | -3.99629300 | -1.08468500 | 2.79406100  |
| C  | -3.05387100 | -2.81855600 | 4.09205400  |
| H  | -2.95489900 | -2.15698400 | 4.95841500  |
| H  | -4.01222800 | -3.33952600 | 4.18897600  |
| H  | -2.23935000 | -3.54233500 | 4.07109300  |
| C  | -3.93854100 | 0.53163400  | -3.93630600 |
| H  | -4.83820600 | -0.07708600 | -4.04720800 |
| H  | -4.17714900 | 1.59538200  | -4.00228100 |

|   |             |             |             |
|---|-------------|-------------|-------------|
| H | -3.25308300 | 0.28470300  | -4.75538800 |
| H | -3.61981300 | 4.36512500  | 3.27529700  |
| O | -3.87231800 | 0.58550000  | 0.74811400  |
| C | -5.08838300 | 0.80371900  | 0.00858800  |
| H | -5.85527000 | 1.25239300  | 0.64854700  |
| H | -4.87728500 | 1.45811200  | -0.83944100 |
| H | -5.41157000 | -0.17482800 | -0.34681400 |
| N | 0.53357000  | 0.72930100  | 0.53379500  |
| C | 1.69196200  | 1.43977700  | 0.34596700  |
| C | 0.47832800  | -0.12497100 | 1.54340500  |
| C | 1.82547000  | 2.34238100  | -0.73593400 |
| C | 2.77888200  | 1.24941100  | 1.25187800  |
| C | 1.57970000  | -0.29577500 | 2.41813000  |
| H | -0.43215800 | -0.69519300 | 1.67358200  |
| C | 3.00313200  | 3.02565700  | -0.91351100 |
| H | 0.99392200  | 2.45792900  | -1.42423000 |
| C | 3.98302600  | 1.96349400  | 1.05133600  |
| N | 2.70184700  | 0.37638700  | 2.29263700  |
| H | 1.51036300  | -1.01559400 | 3.22912100  |
| C | 4.09407500  | 2.83639400  | -0.01536900 |
| H | 3.12211500  | 3.70673000  | -1.74843400 |
| H | 4.80428500  | 1.78272500  | 1.73451500  |
| C | 5.31830400  | 3.54672200  | -0.23629200 |
| N | 6.30834500  | 4.12792500  | -0.41845300 |
| N | 4.24803300  | -0.09664700 | -1.94065100 |
| C | 2.99372700  | -0.43708300 | -2.25447200 |
| C | 4.78160400  | -0.64287100 | -0.84307700 |
| C | 2.23393100  | -1.32686300 | -1.48991700 |
| H | 2.56130700  | 0.03273700  | -3.13321800 |
| C | 4.09802600  | -1.54414200 | -0.02226500 |
| H | 5.79287900  | -0.33271900 | -0.59283200 |
| C | 2.79467100  | -1.90510500 | -0.35745300 |
| S | 0.53374900  | -1.68089300 | -1.95304500 |
| C | 4.76407500  | -2.08597100 | 1.21044100  |
| H | 2.21226800  | -2.58313900 | 0.25439800  |
| O | 0.55694500  | -2.55557800 | -3.12553300 |
| O | -0.06400700 | -2.25184200 | -0.70176700 |
| O | -0.02803200 | -0.30122500 | -2.26855800 |
| F | 5.60933100  | -3.09747200 | 0.92353500  |
| F | 3.86117800  | -2.55833900 | 2.09886100  |
| F | 5.48963600  | -1.12870700 | 1.83161300  |

Int 2

0 1

|    |             |             |             |
|----|-------------|-------------|-------------|
| Pd | -0.49880800 | -0.63167300 | -1.25428400 |
| O  | 1.01656000  | -0.46032100 | -2.56267600 |
| C  | 2.24919400  | -0.67501700 | -2.20607500 |
| O  | 2.63128100  | -1.04933100 | -1.08778300 |
| Ag | 1.54154500  | -1.85573500 | 0.86991900  |
| O  | 0.25431600  | -3.41453400 | -0.19018600 |
| C  | -0.33757300 | -3.48806200 | -1.29306500 |
| O  | -0.84218200 | -2.50152300 | -1.95314600 |
| C  | -0.49912200 | -4.84117500 | -1.95252300 |
| H  | -1.31509600 | -4.83616900 | -2.67708800 |
| H  | 0.43355800  | -5.07740100 | -2.47804300 |
| H  | -0.65840000 | -5.60861600 | -1.19172500 |
| C  | 3.26053000  | -0.34862500 | -3.28784900 |
| H  | 4.15861100  | -0.95340800 | -3.14935200 |
| H  | 2.84031800  | -0.50010800 | -4.28412600 |
| H  | 3.53593800  | 0.70745900  | -3.18539200 |
| N  | -2.16366700 | -0.76404800 | -0.02417300 |
| C  | -3.18579900 | 0.15144700  | -0.09395000 |
| C  | -2.22589800 | -1.71002500 | 0.90298400  |
| C  | -3.19617000 | 1.16731000  | -1.07860900 |
| C  | -4.25652300 | 0.06382400  | 0.84896800  |
| C  | -3.30438800 | -1.76476700 | 1.82172500  |
| H  | -1.41582200 | -2.43008800 | 0.93234300  |
| C  | -4.23099800 | 2.06997600  | -1.11909600 |
| H  | -2.38455400 | 1.21390700  | -1.79582900 |
| C  | -5.30966300 | 1.00659700  | 0.79191000  |
| N  | -4.29599200 | -0.90299300 | 1.80651100  |
| H  | -3.31579500 | -2.54135500 | 2.58152700  |
| C  | -5.29708600 | 1.99526800  | -0.17566700 |
| H  | -4.24963600 | 2.84955400  | -1.87243200 |
| H  | -6.10985300 | 0.92685600  | 1.51824800  |
| C  | -6.36040400 | 2.95340600  | -0.24373700 |
| N  | -7.21733200 | 3.73569400  | -0.31099700 |
| N  | 0.16498000  | 1.13902300  | -0.35668100 |
| C  | 0.28916800  | 0.90835900  | 0.96510800  |
| C  | 1.06070000  | 1.94263600  | -0.95937900 |
| C  | 1.39527500  | 1.31938600  | 1.69122600  |
| H  | -0.47027200 | 0.31102700  | 1.45068800  |
| C  | 2.12548500  | 2.49813900  | -0.25504100 |
| H  | 0.95217100  | 2.07569900  | -2.02750300 |
| C  | 2.33626500  | 2.13954200  | 1.08034100  |
| S  | 1.67567900  | 0.41606700  | 3.24675900  |
| C  | 3.07276400  | 3.42507000  | -0.97110000 |
| H  | 3.21975700  | 2.45603200  | 1.62437300  |

|   |            |             |             |
|---|------------|-------------|-------------|
| O | 2.32419800 | -0.84469400 | 2.68632300  |
| O | 2.60387200 | 1.22979200  | 4.03537600  |
| O | 0.31565300 | 0.17288100  | 3.76288400  |
| F | 4.29838300 | 3.39748500  | -0.42340100 |
| F | 2.63201800 | 4.69814800  | -0.93290200 |
| F | 3.19190200 | 3.08596800  | -2.27802600 |

Pre\_TS2°

0 1

|    |             |             |             |
|----|-------------|-------------|-------------|
| C  | 1.67645800  | -2.92183700 | -1.74444900 |
| C  | 1.80904900  | -2.64454800 | -3.10513000 |
| C  | 0.66387400  | -2.54732500 | -3.90279000 |
| C  | -0.61854600 | -2.73793900 | -3.38717800 |
| C  | -0.76446200 | -3.01719800 | -2.02940000 |
| H  | 2.78633100  | -2.51230000 | -3.55184100 |
| H  | -1.48770200 | -2.67003200 | -4.03156300 |
| H  | -1.74282900 | -3.23922500 | -1.61413000 |
| C  | 0.37153200  | -3.06251000 | -1.17858800 |
| H  | 0.31261400  | -3.50543100 | -0.18971400 |
| Pd | -0.22490200 | -0.93882700 | -0.54519100 |
| O  | 0.42484100  | -0.02551400 | -2.23848300 |
| C  | 1.21584200  | 0.98612100  | -2.38524100 |
| O  | 2.12959100  | 1.32178300  | -1.59373500 |
| Ag | 2.91321000  | 0.16876200  | -0.00544100 |
| O  | 3.93270300  | -1.10592300 | 1.35592500  |
| C  | 3.06145800  | -1.68849600 | 2.08907500  |
| O  | 1.82898400  | -1.44729700 | 2.04262500  |
| C  | 3.57927900  | -2.76044200 | 3.03182600  |
| H  | 3.46407000  | -3.73726900 | 2.54549000  |
| H  | 4.63668900  | -2.61005900 | 3.25739100  |
| H  | 2.99361000  | -2.77256000 | 3.95444800  |
| C  | 0.96519400  | 1.83452600  | -3.60254500 |
| H  | 1.91331000  | 2.20200100  | -4.00185700 |
| H  | 0.40894900  | 1.27996900  | -4.36046500 |
| H  | 0.36970700  | 2.70782200  | -3.28756000 |
| H  | 0.78589300  | -2.32700300 | -4.95917200 |
| O  | 2.69012600  | -3.09632200 | -0.88381600 |
| C  | 4.02948300  | -2.86970900 | -1.33678500 |
| H  | 4.31639300  | -3.62360700 | -2.07839200 |
| H  | 4.12613400  | -1.86417000 | -1.76041200 |
| H  | 4.65062500  | -2.93994000 | -0.44677800 |
| N  | -1.40656200 | -1.73268100 | 0.96212900  |
| C  | -2.77441700 | -1.62795500 | 0.82823600  |
| C  | -0.91325200 | -2.28787800 | 2.05852900  |

|   |             |             |             |
|---|-------------|-------------|-------------|
| C | -3.36719900 | -1.01860900 | -0.30328700 |
| C | -3.60750500 | -2.14201100 | 1.86975900  |
| C | -1.77943400 | -2.78847800 | 3.06667900  |
| H | 0.17180100  | -2.29788700 | 2.16862500  |
| C | -4.73539000 | -0.92010800 | -0.39590400 |
| H | -2.73417100 | -0.62235300 | -1.08936800 |
| C | -5.01281700 | -2.04073000 | 1.74983400  |
| N | -3.08840100 | -2.72875600 | 2.98424400  |
| H | -1.34748000 | -3.24240300 | 3.95475900  |
| C | -5.57014100 | -1.43944200 | 0.63495100  |
| H | -5.19081800 | -0.43828500 | -1.25382500 |
| H | -5.62533300 | -2.44000300 | 2.54964400  |
| C | -6.99402200 | -1.34225400 | 0.50694700  |
| N | -8.14855900 | -1.27193800 | 0.39443700  |
| N | -0.46303300 | 0.92472800  | 0.25769600  |
| C | -1.07945000 | 1.87131400  | -0.47010400 |
| C | 0.28592200  | 1.25812500  | 1.32516600  |
| C | -0.93408800 | 3.21936600  | -0.18135500 |
| H | -1.67561100 | 1.55818600  | -1.31757300 |
| C | 0.46278400  | 2.59581200  | 1.66559200  |
| H | 0.76809500  | 0.44670500  | 1.86284400  |
| C | -0.14081200 | 3.59500000  | 0.90073800  |
| S | -1.66022400 | 4.40381100  | -1.36568200 |
| C | 1.41286100  | 2.90186300  | 2.79211700  |
| H | -0.00967800 | 4.64860400  | 1.12362100  |
| O | -2.92014400 | 3.72588600  | -1.74840900 |
| O | -1.77950600 | 5.64771400  | -0.58442800 |
| O | -0.61318600 | 4.40500000  | -2.42235600 |
| F | 1.33847900  | 4.18224600  | 3.18411500  |
| F | 2.69278800  | 2.66031100  | 2.41009900  |
| F | 1.17351400  | 2.11548900  | 3.86389500  |

TS2°

0 1

|   |             |             |             |
|---|-------------|-------------|-------------|
| C | -2.49564300 | -2.08924500 | -1.82958300 |
| C | -3.25303000 | -2.28727300 | -2.98807900 |
| C | -4.02839200 | -1.23975200 | -3.48335700 |
| C | -4.08592700 | -0.00502000 | -2.82772700 |
| C | -3.32508500 | 0.17909100  | -1.68125300 |
| H | -3.24865700 | -3.23948500 | -3.50441900 |
| H | -4.71228000 | 0.79286800  | -3.21361700 |
| H | -3.37629300 | 1.13403700  | -1.16641800 |
| C | -2.49200500 | -0.83739900 | -1.14754600 |
| H | -2.81420400 | -1.11992500 | 0.16913300  |

|    |             |             |             |
|----|-------------|-------------|-------------|
| Pd | -0.62884400 | -0.06721100 | -0.51454700 |
| O  | 0.31601300  | -1.20746400 | -1.91723100 |
| C  | 1.17617700  | -2.12237200 | -1.63389300 |
| O  | 1.29924300  | -2.68727500 | -0.51125600 |
| Ag | -0.22291200 | -2.49462500 | 0.97535100  |
| O  | -1.80622100 | -2.35296200 | 2.41135100  |
| C  | -3.01873800 | -2.06636400 | 2.20268300  |
| O  | -3.48251200 | -1.40367900 | 1.21180500  |
| C  | -4.03624200 | -2.52991500 | 3.22253400  |
| H  | -4.89346600 | -1.85439300 | 3.25046600  |
| H  | -4.39498500 | -3.52233000 | 2.92416300  |
| H  | -3.57380200 | -2.61894900 | 4.20750900  |
| C  | 2.12195300  | -2.49487500 | -2.74277400 |
| H  | 2.45366800  | -3.52843200 | -2.62454800 |
| H  | 1.65333100  | -2.34155800 | -3.71742000 |
| H  | 3.00571900  | -1.83763100 | -2.68300800 |
| H  | -4.60849800 | -1.39846500 | -4.38813700 |
| O  | -1.77346300 | -3.07669000 | -1.24816700 |
| C  | -1.56192200 | -4.30055100 | -1.95108700 |
| H  | -2.49890300 | -4.85612800 | -2.06779800 |
| H  | -1.11435700 | -4.10735800 | -2.93161200 |
| H  | -0.86640200 | -4.87302400 | -1.33763100 |
| N  | -1.44373600 | 1.32735800  | 0.76807900  |
| C  | -1.59342000 | 2.63152200  | 0.35983300  |
| C  | -1.72232800 | 1.02716700  | 2.02664800  |
| C  | -1.27386600 | 3.02703400  | -0.96062300 |
| C  | -2.07230200 | 3.59868400  | 1.29699600  |
| C  | -2.19060000 | 2.01305400  | 2.93039800  |
| H  | -1.57760900 | 0.00089500  | 2.34051900  |
| C  | -1.43128600 | 4.33867900  | -1.33871100 |
| H  | -0.90234800 | 2.28459400  | -1.65944600 |
| C  | -2.23488000 | 4.94178600  | 0.88427000  |
| N  | -2.37202400 | 3.26715500  | 2.58321500  |
| H  | -2.41507600 | 1.73191100  | 3.95603000  |
| C  | -1.92092600 | 5.30631700  | -0.41310900 |
| H  | -1.18081200 | 4.65140400  | -2.34617600 |
| H  | -2.60217800 | 5.66094000  | 1.60686800  |
| C  | -2.09034000 | 6.66405700  | -0.83882600 |
| N  | -2.23355300 | 7.76177200  | -1.19259000 |
| N  | 1.29373300  | 0.56225000  | 0.04532800  |
| C  | 2.21696100  | 0.77149800  | -0.90990900 |
| C  | 1.68813700  | 0.38427700  | 1.31747300  |
| C  | 3.57806900  | 0.76447300  | -0.63210000 |
| H  | 1.86730500  | 0.91396400  | -1.92481200 |



|   |            |             |             |
|---|------------|-------------|-------------|
| C | 3.03233200 | 0.38450100  | 1.66985300  |
| H | 0.91445800 | 0.22404700  | 2.05823200  |
| C | 3.99933900 | 0.56437500  | 0.68027900  |
| S | 4.73899300 | 0.83972600  | -2.03631600 |
| C | 3.37981200 | 0.08642100  | 3.10189500  |
| H | 5.06136600 | 0.55461400  | 0.90159500  |
| O | 4.06994500 | 1.78671400  | -2.95520100 |
| O | 6.00148600 | 1.28609400  | -1.41811900 |
| O | 4.71262700 | -0.58134400 | -2.47807300 |
| F | 4.65966700 | 0.36537200  | 3.38476300  |
| F | 3.16670600 | -1.22135500 | 3.38486400  |
| F | 2.59594400 | 0.79530700  | 3.95087300  |

Pro 2°

0 1

|    |             |             |             |
|----|-------------|-------------|-------------|
| C  | -1.99421000 | -2.38419700 | -1.89165700 |
| C  | -3.02423800 | -3.05035500 | -2.56762100 |
| C  | -4.23524900 | -2.40277100 | -2.80606900 |
| C  | -4.42748000 | -1.09784600 | -2.35724900 |
| C  | -3.39254700 | -0.44270600 | -1.68562600 |
| H  | -2.88503800 | -4.07340800 | -2.89953300 |
| H  | -5.36861100 | -0.58631700 | -2.53619700 |
| H  | -3.55428400 | 0.58200400  | -1.36462700 |
| C  | -2.15142700 | -1.05453300 | -1.44791900 |
| H  | -2.44438100 | -2.39085300 | 0.33337500  |
| Pd | -0.62915700 | 0.03736400  | -0.69388400 |
| O  | 0.59112600  | -0.58856300 | -2.20491000 |
| C  | 1.67590600  | -1.26037200 | -2.05818700 |
| O  | 2.01547500  | -1.89820000 | -1.02110500 |
| Ag | 0.59677400  | -2.27084800 | 0.54664100  |
| O  | -0.86452800 | -2.89500300 | 2.09584600  |
| C  | -2.05405500 | -3.22439200 | 2.04092800  |
| O  | -2.88036000 | -2.89535000 | 1.06378300  |
| C  | -2.70383300 | -4.05194600 | 3.11156300  |
| H  | -3.70949600 | -3.68253000 | 3.32681700  |
| H  | -2.80122300 | -5.08098000 | 2.74580800  |
| H  | -2.08453600 | -4.05133200 | 4.00866300  |
| C  | 2.62914100  | -1.23696000 | -3.22279800 |
| H  | 3.12650800  | -2.20540800 | -3.31698000 |
| H  | 2.11088700  | -0.97133600 | -4.14588500 |
| H  | 3.40248000  | -0.48027000 | -3.01277900 |
| H  | -5.02709300 | -2.92618000 | -3.33348700 |
| O  | -0.81828400 | -3.02780900 | -1.57159500 |
| C  | -0.35139000 | -4.06647100 | -2.43063900 |

|   |             |             |             |
|---|-------------|-------------|-------------|
| H | -0.90888100 | -4.99818700 | -2.27734900 |
| H | -0.42663100 | -3.75761900 | -3.47851400 |
| H | 0.69574700  | -4.21931700 | -2.16579500 |
| N | -1.83594100 | 0.95016300  | 0.71376900  |
| C | -2.31399300 | 2.21611700  | 0.47422500  |
| C | -2.08216300 | 0.40718400  | 1.89568900  |
| C | -2.06808000 | 2.86652900  | -0.75851800 |
| C | -3.06653100 | 2.88027200  | 1.49232900  |
| C | -2.82658100 | 1.09343200  | 2.88553200  |
| H | -1.68160200 | -0.58081800 | 2.08263800  |
| C | -2.55596800 | 4.13276300  | -0.97274700 |
| H | -1.49042200 | 2.35151900  | -1.51990000 |
| C | -3.56373600 | 4.18203700  | 1.24895200  |
| N | -3.31699200 | 2.29809800  | 2.69729000  |
| H | -3.00874800 | 0.61603200  | 3.84512900  |
| C | -3.31356600 | 4.79824200  | 0.03578300  |
| H | -2.36734900 | 4.64047100  | -1.91196000 |
| H | -4.13277400 | 4.67030800  | 2.03125300  |
| C | -3.82053100 | 6.11417000  | -0.21869800 |
| N | -4.23540200 | 7.17837200  | -0.43318900 |
| N | 1.09669700  | 1.04429200  | 0.13522300  |
| C | 2.04490100  | 1.53610400  | -0.68194600 |
| C | 1.45345400  | 0.62204500  | 1.36008300  |
| C | 3.38722900  | 1.58487100  | -0.32040500 |
| H | 1.73401400  | 1.87386700  | -1.66336500 |
| C | 2.77723700  | 0.61865100  | 1.78464900  |
| H | 0.66119700  | 0.26823300  | 2.01048300  |
| C | 3.76786100  | 1.09961400  | 0.92911700  |
| S | 4.61245500  | 2.12947000  | -1.55593000 |
| C | 3.07912300  | -0.02765600 | 3.10508000  |
| H | 4.81621600  | 1.11242200  | 1.20787100  |
| O | 3.86487200  | 3.15309900  | -2.31884000 |
| O | 5.73946300  | 2.60348400  | -0.72961300 |
| O | 4.85677400  | 0.85821900  | -2.28945600 |
| F | 4.33168700  | 0.19730800  | 3.51925800  |
| F | 2.90870000  | -1.37808600 | 3.02162200  |
| F | 2.22929000  | 0.39664500  | 4.07113900  |

Int 3

l 1

|    |             |             |            |
|----|-------------|-------------|------------|
| Pd | -0.67826100 | -0.81493000 | 0.63526700 |
| O  | -2.04315100 | -0.40079300 | 2.09374200 |
| C  | -2.94716100 | 0.51348100  | 2.01781500 |
| O  | -3.32138700 | 1.09317000  | 0.96311900 |

|    |             |             |             |
|----|-------------|-------------|-------------|
| Ag | -3.08132400 | -0.05888000 | -0.84297500 |
| O  | -2.56789100 | -1.97496400 | -1.70875400 |
| C  | -2.16397900 | -2.85488700 | -0.88994700 |
| O  | -1.49294400 | -2.62475200 | 0.17876600  |
| C  | -2.49131900 | -4.30009600 | -1.17122700 |
| H  | -1.89722200 | -4.97070100 | -0.55002100 |
| H  | -3.55454800 | -4.46173100 | -0.96018200 |
| H  | -2.33376500 | -4.51143900 | -2.23211000 |
| C  | -3.61545900 | 0.88854600  | 3.31918500  |
| H  | -4.61120100 | 0.43152500  | 3.34081400  |
| H  | -3.04596800 | 0.53493000  | 4.17917100  |
| H  | -3.75165300 | 1.97210800  | 3.36066500  |
| N  | 0.84639700  | -1.26669500 | -0.68929200 |
| C  | 2.13754600  | -1.44650300 | -0.25713500 |
| C  | 0.60023200  | -1.32398000 | -1.99195100 |
| C  | 2.45976000  | -1.50566600 | 1.11856300  |
| C  | 3.17433000  | -1.59517800 | -1.23411800 |
| C  | 1.64777700  | -1.50333400 | -2.92740700 |
| H  | -0.43170900 | -1.23174500 | -2.31084200 |
| C  | 3.76716300  | -1.66462800 | 1.51034600  |
| H  | 1.66377000  | -1.46219700 | 1.85279800  |
| C  | 4.51612200  | -1.74140800 | -0.80800300 |
| N  | 2.90729000  | -1.61014700 | -2.56642600 |
| H  | 1.41708700  | -1.53973300 | -3.98876600 |
| C  | 4.81042500  | -1.76786300 | 0.54321000  |
| H  | 4.02130800  | -1.72508800 | 2.56280000  |
| H  | 5.28672400  | -1.84149400 | -1.56346300 |
| C  | 6.16334200  | -1.91314500 | 0.98991500  |
| N  | 7.25604000  | -2.02416000 | 1.36909100  |
| N  | 0.20753700  | 0.95903100  | 1.20597000  |
| C  | 0.47588400  | 1.99121100  | 0.34272200  |
| C  | 0.53842400  | 1.09569900  | 2.48338600  |
| C  | 0.07885800  | 1.95308800  | -1.01371800 |
| C  | 1.16058400  | 3.14439200  | 0.84595800  |
| C  | 1.20265200  | 2.25567100  | 2.94821600  |
| H  | 0.27746700  | 0.28661000  | 3.15553600  |
| C  | 0.37237500  | 3.00577800  | -1.84605900 |
| H  | -0.47845200 | 1.09938500  | -1.37826700 |
| C  | 1.46266400  | 4.21341100  | -0.03177200 |
| N  | 1.52333300  | 3.25083300  | 2.15085000  |
| H  | 1.47187600  | 2.33647500  | 3.99789600  |
| C  | 1.07974800  | 4.14470200  | -1.35882900 |
| H  | 0.06203500  | 2.98759400  | -2.88502000 |
| H  | 1.98702000  | 5.07323000  | 0.36862200  |

|          |             |             |             |
|----------|-------------|-------------|-------------|
| C        | 1.37825000  | 5.21732500  | -2.25948400 |
| N        | 1.61557000  | 6.07620000  | -3.00520100 |
| L8-      |             |             |             |
| -1 1     |             |             |             |
| C        | 0.86007600  | 1.77436200  | -0.03669100 |
| C        | 0.97326500  | 0.38055900  | -0.02544300 |
| C        | -0.19408600 | -0.37347500 | 0.00047900  |
| C        | -1.41863500 | 0.29751200  | 0.03419500  |
| C        | -1.42349400 | 1.69463800  | 0.03790600  |
| N        | -0.30822900 | 2.43216900  | -0.00121800 |
| H        | -0.12562500 | -1.45594200 | -0.01325600 |
| H        | 1.76375300  | 2.37541300  | -0.09120900 |
| H        | -2.36490300 | 2.23842500  | 0.07543200  |
| S        | 2.60338900  | -0.42611400 | 0.00314700  |
| O        | 2.97014300  | -0.39243300 | 1.44114800  |
| O        | 2.32361200  | -1.78136200 | -0.53693600 |
| O        | 3.43028500  | 0.44516100  | -0.86929200 |
| C        | -2.70711800 | -0.46102100 | 0.00265400  |
| F        | -2.61823200 | -1.65296100 | 0.63586000  |
| F        | -3.11556900 | -0.73020300 | -1.26480700 |
| F        | -3.72200100 | 0.22631500  | 0.58775100  |
| Pre_TS3° |             |             |             |
| 1 1      |             |             |             |
| C        | 2.82189700  | -0.48177500 | 2.11541400  |
| C        | 3.29011400  | -1.78687400 | 2.33965800  |
| C        | 2.50729200  | -2.66623200 | 3.07818900  |
| C        | 1.25219200  | -2.30365300 | 3.60877800  |
| C        | 0.77685600  | -1.02834500 | 3.39012700  |
| H        | 4.26050300  | -2.09697500 | 1.97452300  |
| H        | 0.68770000  | -3.01534100 | 4.20053400  |
| H        | -0.15640000 | -0.69563700 | 3.83452100  |
| C        | 1.51527800  | -0.10869000 | 2.58151900  |
| H        | 1.34069600  | 0.95384000  | 2.71483300  |
| Pd       | 0.31719800  | -0.37704200 | 0.69411700  |
| O        | 0.64567400  | -2.37809100 | 0.58216200  |
| C        | 1.60386200  | -2.91946600 | -0.08488000 |
| O        | 2.45357300  | -2.31807800 | -0.78537500 |
| Ag       | 2.34922700  | -0.33519500 | -1.55912200 |
| O        | 1.89385100  | 1.49713400  | -2.54392100 |
| C        | 2.76161200  | 2.37583000  | -2.13802400 |
| O        | 3.54744600  | 2.16827400  | -1.19605500 |
| C        | 2.74342700  | 3.69763300  | -2.88050900 |

|   |             |             |             |
|---|-------------|-------------|-------------|
| H | 3.41680400  | 4.41571900  | -2.41009400 |
| H | 3.05774500  | 3.53402800  | -3.91678500 |
| H | 1.72521700  | 4.09917300  | -2.91553900 |
| C | 1.69182800  | -4.42427200 | 0.00976400  |
| H | 2.72212200  | -4.70991200 | 0.24019200  |
| H | 1.00988700  | -4.81925100 | 0.76302200  |
| H | 1.44681100  | -4.85514700 | -0.96697000 |
| H | 2.88962800  | -3.66550500 | 3.26642300  |
| O | 3.50415200  | 0.48841000  | 1.51452100  |
| C | 4.79677700  | 0.21254800  | 0.93429500  |
| H | 5.51853600  | -0.00311800 | 1.72743300  |
| H | 4.72474600  | -0.62750100 | 0.23743200  |
| H | 5.05499800  | 1.11712900  | 0.39071000  |
| N | -0.02483300 | 1.64809200  | 0.76614300  |
| C | -1.26982000 | 2.19515700  | 0.96554300  |
| C | 0.98915400  | 2.44703300  | 0.46355100  |
| C | -2.37722600 | 1.40294600  | 1.34341700  |
| C | -1.43152600 | 3.60490000  | 0.78320900  |
| C | 0.78843100  | 3.84225400  | 0.30358300  |
| H | 1.97338900  | 2.01302100  | 0.31535100  |
| C | -3.61006700 | 1.98694000  | 1.51449800  |
| H | -2.24234000 | 0.33947700  | 1.50257600  |
| C | -2.71046800 | 4.18365500  | 0.95886400  |
| N | -0.38778800 | 4.41018800  | 0.44385100  |
| H | 1.63664100  | 4.46711300  | 0.03940500  |
| C | -3.78523800 | 3.38731400  | 1.31458700  |
| H | -4.46504000 | 1.38786500  | 1.80789500  |
| H | -2.81534600 | 5.25223400  | 0.81137100  |
| C | -5.08601500 | 3.95992100  | 1.49239400  |
| N | -6.14817000 | 4.40804800  | 1.63779200  |
| N | -1.03648300 | -0.49966000 | -0.92858400 |
| C | -2.11716300 | -1.34816700 | -0.87811100 |
| C | -0.88705300 | 0.27958200  | -1.99133500 |
| C | -2.36094500 | -2.18312900 | 0.23848700  |
| C | -3.03329200 | -1.35746700 | -1.97901900 |
| C | -1.81147400 | 0.23166900  | -3.06602900 |
| H | -0.03054000 | 0.94699400  | -2.03760200 |
| C | -3.47067000 | -2.99381700 | 0.25863200  |
| H | -1.65578400 | -2.19656100 | 1.05967300  |
| C | -4.16557900 | -2.20532800 | -1.93827900 |
| N | -2.85828300 | -0.56160000 | -3.06784500 |
| H | -1.65285100 | 0.87276600  | -3.92890800 |
| C | -4.38412700 | -3.01079700 | -0.83548500 |
| H | -3.66251200 | -3.63690000 | 1.11050100  |

|      |             |             |             |
|------|-------------|-------------|-------------|
| H    | -4.84383900 | -2.19502100 | -2.78350800 |
| C    | -5.52883200 | -3.86970700 | -0.77654100 |
| N    | -6.45279600 | -4.57128900 | -0.71079800 |
| TS3° |             |             |             |
| 1 1  |             |             |             |
| C    | 2.61650100  | -0.28707700 | 2.17778900  |
| C    | 2.92387000  | -0.18872000 | 3.53819500  |
| C    | 2.31714800  | 0.80186200  | 4.30725100  |
| C    | 1.42852100  | 1.72500000  | 3.73959400  |
| C    | 1.13139800  | 1.62295300  | 2.39136100  |
| H    | 3.62614000  | -0.86887600 | 4.00380400  |
| H    | 0.98977800  | 2.50886100  | 4.34794600  |
| H    | 0.46477700  | 2.35433400  | 1.94666900  |
| C    | 1.70112500  | 0.62044600  | 1.55292100  |
| H    | 2.41707000  | 1.21792300  | 0.58835000  |
| Pd   | 0.27151600  | -0.14165300 | 0.22035900  |
| O    | 0.46968500  | -2.00411800 | 1.03918200  |
| C    | 0.95427400  | -2.98870500 | 0.37384500  |
| O    | 1.58755100  | -2.90654500 | -0.71133300 |
| Ag   | 2.58712800  | -1.08973700 | -1.27061100 |
| O    | 3.58524700  | 0.68851000  | -1.87019900 |
| C    | 3.84157900  | 1.69370100  | -1.13981600 |
| O    | 3.24625200  | 1.99932300  | -0.05356000 |
| C    | 4.93913700  | 2.62635600  | -1.59718100 |
| H    | 4.78799200  | 3.63072500  | -1.19800600 |
| H    | 5.89476200  | 2.24631200  | -1.21637200 |
| H    | 4.99649300  | 2.64062000  | -2.68751400 |
| C    | 0.69813300  | -4.35402200 | 0.97026600  |
| H    | 1.28029900  | -5.11587500 | 0.45126900  |
| H    | 0.94032400  | -4.34835600 | 2.03675300  |
| H    | -0.36841300 | -4.58892700 | 0.88113800  |
| H    | 2.55706500  | 0.86474500  | 5.36470600  |
| O    | 3.20883200  | -1.18266500 | 1.35897400  |
| C    | 4.16652000  | -2.10750800 | 1.88676000  |
| H    | 5.02945000  | -1.57903600 | 2.30352200  |
| H    | 3.70728900  | -2.74284700 | 2.65070300  |
| H    | 4.47823400  | -2.71696400 | 1.03903800  |
| N    | -0.13889500 | 1.71669900  | -0.59006000 |
| C    | -1.23873100 | 2.43783100  | -0.18807700 |
| C    | 0.58169600  | 2.18032200  | -1.60063600 |
| C    | -2.06010900 | 1.99734400  | 0.87557300  |
| C    | -1.55426200 | 3.65532200  | -0.86949900 |
| C    | 0.24314400  | 3.39429400  | -2.24879600 |

|   |             |             |             |
|---|-------------|-------------|-------------|
| H | 1.43985600  | 1.59961100  | -1.91583900 |
| C | -3.15932400 | 2.73498000  | 1.24467200  |
| H | -1.80588500 | 1.07962800  | 1.39346000  |
| C | -2.68950900 | 4.40078000  | -0.47207300 |
| N | -0.79558100 | 4.11876900  | -1.89938000 |
| H | 0.85956400  | 3.75093600  | -3.06979200 |
| C | -3.48218200 | 3.94744100  | 0.56747800  |
| H | -3.79406400 | 2.40389600  | 2.05912800  |
| H | -2.91191400 | 5.31980900  | -1.00166400 |
| C | -4.63596900 | 4.69032400  | 0.97801900  |
| N | -5.57567900 | 5.28065000  | 1.32246300  |
| N | -1.22893700 | -0.97174100 | -1.06869300 |
| C | -2.35658500 | -1.58620900 | -0.58723000 |
| C | -1.05772700 | -0.91660000 | -2.37972700 |
| C | -2.59511900 | -1.70558700 | 0.80358100  |
| C | -3.30850300 | -2.11399500 | -1.51776700 |
| C | -2.01017900 | -1.45901400 | -3.27663300 |
| H | -0.15481700 | -0.44161900 | -2.74754300 |
| C | -3.74365900 | -2.31326500 | 1.24925800  |
| H | -1.85045500 | -1.34619800 | 1.50276200  |
| C | -4.48678500 | -2.73224300 | -1.03539700 |
| N | -3.11475600 | -2.03861200 | -2.86172800 |
| H | -1.83743900 | -1.40099500 | -4.34811400 |
| C | -4.70306600 | -2.82807900 | 0.32723100  |
| H | -3.93283100 | -2.41508900 | 2.31223600  |
| H | -5.19632500 | -3.12119400 | -1.75635100 |
| C | -5.89003000 | -3.45141400 | 0.83164300  |
| N | -6.84758800 | -3.95332800 | 1.25765000  |

Pro 3°

1 1

|    |            |             |            |
|----|------------|-------------|------------|
| C  | 2.73759300 | -0.31045500 | 2.00577300 |
| C  | 3.57766300 | 0.13873100  | 3.03280100 |
| C  | 3.32854600 | 1.35860000  | 3.66051000 |
| C  | 2.25050100 | 2.14242100  | 3.25947900 |
| C  | 1.41701600 | 1.68797000  | 2.23478500 |
| H  | 4.42913200 | -0.45498700 | 3.34304900 |
| H  | 2.05098200 | 3.09566900  | 3.73859800 |
| H  | 0.57497100 | 2.30862300  | 1.94845500 |
| C  | 1.62628800 | 0.45820700  | 1.58795100 |
| H  | 3.25719000 | 1.18021200  | 0.32887200 |
| Pd | 0.19306800 | -0.19100600 | 0.31737400 |
| O  | 0.21562400 | -2.06121900 | 1.14201600 |
| C  | 0.58997400 | -3.08512800 | 0.47130600 |

|    |             |             |             |
|----|-------------|-------------|-------------|
| O  | 1.19971600  | -3.06581700 | -0.63304400 |
| Ag | 2.39305900  | -1.33734700 | -1.16003400 |
| O  | 3.68275800  | 0.29426300  | -1.87448800 |
| C  | 4.26662600  | 1.23874800  | -1.32369600 |
| O  | 3.97195700  | 1.69576500  | -0.12197300 |
| C  | 5.39301600  | 1.97354700  | -1.98538600 |
| H  | 5.30881400  | 3.04823800  | -1.80597600 |
| H  | 6.33721300  | 1.63955600  | -1.53859800 |
| H  | 5.40878400  | 1.75281500  | -3.05267300 |
| C  | 0.25472800  | -4.42167500 | 1.09481100  |
| H  | 0.50220900  | -5.23696900 | 0.41465800  |
| H  | 0.82266800  | -4.53473700 | 2.02461700  |
| H  | -0.80663800 | -4.45514400 | 1.35721400  |
| H  | 3.98798200  | 1.69317700  | 4.45501400  |
| O  | 2.99326300  | -1.47904100 | 1.32564900  |
| C  | 3.93781900  | -2.40637100 | 1.86185400  |
| H  | 4.95950600  | -2.01364000 | 1.80989600  |
| H  | 3.68765300  | -2.65473000 | 2.89840100  |
| H  | 3.85776200  | -3.29726300 | 1.23783800  |
| N  | -0.03699100 | 1.69309900  | -0.52026700 |
| C  | -1.10131200 | 2.48621200  | -0.16397900 |
| C  | 0.74496000  | 2.10776400  | -1.50693700 |
| C  | -1.97118100 | 2.11489800  | 0.88796000  |
| C  | -1.32749800 | 3.70810900  | -0.87335800 |
| C  | 0.49888200  | 3.32684000  | -2.18385400 |
| H  | 1.57739500  | 1.47361900  | -1.78507700 |
| C  | -3.03582400 | 2.91985500  | 1.21372400  |
| H  | -1.77770000 | 1.19714100  | 1.43218400  |
| C  | -2.43089900 | 4.52197600  | -0.52284100 |
| N  | -0.51180000 | 4.11195600  | -1.88419900 |
| H  | 1.16097400  | 3.63717000  | -2.98826600 |
| C  | -3.27444700 | 4.13305300  | 0.50248000  |
| H  | -3.70638700 | 2.64358400  | 2.01982000  |
| H  | -2.58801400 | 5.44151900  | -1.07444000 |
| C  | -4.39633700 | 4.94621100  | 0.86547300  |
| N  | -5.31109700 | 5.59492900  | 1.16972500  |
| N  | -1.41915600 | -0.90010100 | -0.98896000 |
| C  | -2.58920400 | -1.42350300 | -0.50269300 |
| C  | -1.26140700 | -0.85116600 | -2.30086400 |
| C  | -2.82153800 | -1.53077400 | 0.89080600  |
| C  | -3.59205100 | -1.86569300 | -1.42370800 |
| C  | -2.26331100 | -1.30718400 | -3.19232300 |
| H  | -0.32714200 | -0.44680200 | -2.67658400 |
| C  | -4.01105700 | -2.04420200 | 1.34734900  |



|   |             |             |             |
|---|-------------|-------------|-------------|
| H | -2.04168100 | -1.23807400 | 1.58281000  |
| C | -4.81163300 | -2.38795200 | -0.93094900 |
| N | -3.40764200 | -1.79755100 | -2.76994600 |
| H | -2.09829900 | -1.25569100 | -4.26550900 |
| C | -5.01959400 | -2.47319900 | 0.43377700  |
| H | -4.19624800 | -2.13604400 | 2.41196200  |
| H | -5.55911800 | -2.71348600 | -1.64495300 |
| C | -6.24864400 | -2.99938400 | 0.94826600  |
| N | -7.24038800 | -3.42269200 | 1.38146000  |

Pd<sub>3</sub>(OAc)<sub>6</sub>

0 1

|    |             |             |             |
|----|-------------|-------------|-------------|
| Pd | 0.00000000  | 1.83699200  | 0.00000000  |
| C  | 2.27374300  | 1.24863400  | 1.86564600  |
| O  | 1.60141200  | 2.11330500  | 1.23022300  |
| O  | 2.29462200  | -0.00437400 | 1.66782100  |
| C  | 0.05552200  | -2.59343600 | -1.86564600 |
| O  | -1.02947000 | -2.44351600 | -1.23022300 |
| O  | 1.15109900  | -1.98501400 | -1.66782100 |
| C  | 0.05889200  | -3.63939500 | -2.95803600 |
| H  | 0.79532500  | -3.38371500 | -3.72235600 |
| H  | 0.34390200  | -4.60131700 | -2.51622700 |
| H  | -0.93684800 | -3.73811500 | -3.39383400 |
| C  | 3.18125500  | 1.76869500  | 2.95803600  |
| H  | 2.76887900  | 2.68039100  | 3.39383400  |
| H  | 3.32804600  | 1.00308600  | 3.72235600  |
| H  | 4.15680800  | 2.00283100  | 2.51622700  |
| Pd | -1.59088200 | -0.91849600 | 0.00000000  |
| C  | -0.05552200 | -2.59343600 | 1.86564600  |
| O  | 1.02947000  | -2.44351600 | 1.23022300  |
| O  | -1.15109900 | -1.98501400 | 1.66782100  |
| C  | 2.21822000  | 1.34480200  | -1.86564600 |
| O  | 1.14352300  | 1.98938800  | -1.66782100 |
| O  | 2.63088200  | 0.33021100  | -1.23022300 |
| C  | 3.12236300  | 1.87070000  | -2.95803600 |
| H  | 3.70572600  | 1.05772400  | -3.39383400 |
| H  | 2.53272100  | 2.38062900  | -3.72235600 |
| H  | 3.81290600  | 2.59848600  | -2.51622700 |
| C  | -0.05889200 | -3.63939500 | 2.95803600  |
| H  | 0.93684800  | -3.73811500 | 3.39383400  |
| H  | -0.79532500 | -3.38371500 | 3.72235600  |
| H  | -0.34390200 | -4.60131700 | 2.51622700  |
| Pd | 1.59088200  | -0.91849600 | 0.00000000  |
| C  | -2.27374300 | 1.24863400  | -1.86564600 |

|   |             |             |             |
|---|-------------|-------------|-------------|
| O | -1.60141200 | 2.11330500  | -1.23022300 |
| O | -2.29462200 | -0.00437400 | -1.66782100 |
| C | -3.18125500 | 1.76869500  | -2.95803600 |
| H | -2.76887900 | 2.68039100  | -3.39383400 |
| H | -3.32804600 | 1.00308600  | -3.72235600 |
| H | -4.15680800 | 2.00283100  | -2.51622700 |
| C | -2.21822000 | 1.34480200  | 1.86564600  |
| O | -1.14352300 | 1.98938800  | 1.66782100  |
| O | -2.63088200 | 0.33021100  | 1.23022300  |
| C | -3.12236300 | 1.87070000  | 2.95803600  |
| H | -3.81290600 | 2.59848600  | 2.51622700  |
| H | -3.70572600 | 1.05772400  | 3.39383400  |
| H | -2.53272100 | 2.38062900  | 3.72235600  |

Ag<sub>2</sub>(OAc)<sub>4</sub>

0 1

|    |             |             |             |
|----|-------------|-------------|-------------|
| C  | -2.67638300 | -0.00002500 | -0.00461700 |
| O  | -2.11179300 | 1.13864700  | -0.00663400 |
| O  | -2.11179000 | -1.13869200 | -0.00664400 |
| O  | 2.11179000  | 1.13869200  | -0.00662400 |
| O  | 2.11179300  | -1.13864700 | -0.00663200 |
| C  | 2.67638300  | 0.00002500  | -0.00460300 |
| C  | 4.19247000  | -0.00000400 | 0.03964600  |
| H  | 4.50889400  | -0.00079900 | 1.08940200  |
| H  | 4.58956700  | -0.89834700 | -0.43664200 |
| H  | 4.58961400  | 0.89898100  | -0.43537800 |
| C  | -4.19247000 | 0.00000300  | 0.03962600  |
| H  | -4.58956600 | 0.89835500  | -0.43664900 |
| H  | -4.58961200 | -0.89897300 | -0.43541500 |
| H  | -4.50889900 | 0.00078000  | 1.08938100  |
| Ag | 0.00000600  | -1.38713200 | -0.00684300 |
| Ag | -0.00000600 | 1.38713200  | -0.00683200 |

(HOAc)<sub>2</sub>

0 1

|   |             |             |             |
|---|-------------|-------------|-------------|
| C | -1.92185400 | 0.05576800  | 0.00001700  |
| O | -1.24565900 | 1.08404800  | -0.00000300 |
| O | -1.41970000 | -1.16630100 | 0.00017500  |
| H | -0.41469500 | -1.12640100 | 0.00032600  |
| H | 0.41469800  | 1.12636300  | 0.00015000  |
| O | 1.24567600  | -1.08406600 | 0.00005900  |
| C | 1.92184700  | -0.05576900 | 0.00007000  |
| O | 1.41969700  | 1.16629600  | 0.00008000  |
| C | 3.42847000  | -0.07504500 | -0.00001700 |

|   |             |             |             |
|---|-------------|-------------|-------------|
| H | 3.80384000  | 0.45453700  | 0.88164200  |
| H | 3.78729600  | -1.10427400 | -0.00017200 |
| H | 3.80378300  | 0.45480900  | -0.88153200 |
| C | -3.42847700 | 0.07507000  | -0.00034100 |
| H | -3.80362400 | -0.45485000 | -0.88189200 |
| H | -3.80402200 | -0.45444300 | 0.88128100  |
| H | -3.78729900 | 1.10430100  | -0.00066300 |

L7

01

|   |             |             |            |
|---|-------------|-------------|------------|
| C | 0.14765800  | -1.99275100 | 0.00000000 |
| C | -1.08578300 | -1.38988800 | 0.00000000 |
| C | -1.18897400 | 0.02421900  | 0.00000000 |
| C | 0.00000000  | 0.81668400  | 0.00000000 |
| C | 1.26264300  | 0.18158200  | 0.00000000 |
| C | 1.33422300  | -1.20134700 | 0.00000000 |
| H | 0.23836200  | -3.07350800 | 0.00000000 |
| H | -2.00386500 | -1.96765500 | 0.00000000 |
| H | 2.15491400  | 0.79730300  | 0.00000000 |
| C | -1.26037800 | 2.71006500  | 0.00000000 |
| C | -2.44543500 | 1.92084600  | 0.00000000 |
| H | -1.33000500 | 3.79634800  | 0.00000000 |
| H | -3.42061000 | 2.40466500  | 0.00000000 |
| N | -0.05701400 | 2.18111600  | 0.00000000 |
| N | -2.42340600 | 0.60577600  | 0.00000000 |
| C | 2.61028400  | -1.85368300 | 0.00000000 |
| N | 3.63981600  | -2.39425000 | 0.00000000 |

L8

01

|   |             |             |             |
|---|-------------|-------------|-------------|
| C | 0.91391100  | 1.72726600  | -0.02316100 |
| C | 0.98291300  | 0.34383800  | -0.02223900 |
| C | -0.20633400 | -0.38521200 | -0.01989800 |
| C | -1.43641300 | 0.28235600  | 0.00425100  |
| C | -1.46471900 | 1.66478300  | 0.01655000  |
| N | -0.29167100 | 2.33886000  | -0.00026800 |
| H | -0.15418500 | -1.46989500 | -0.05355000 |
| H | 1.80858500  | 2.33871300  | -0.05853800 |
| H | -2.37543800 | 2.24691300  | 0.03160200  |
| H | -0.32033200 | 3.35437100  | -0.00361200 |
| S | 2.63289600  | -0.46335000 | 0.00337000  |
| O | 2.76953600  | -0.74832300 | 1.44508200  |
| O | 2.40680500  | -1.62605500 | -0.87439100 |
| O | 3.48793300  | 0.61915300  | -0.52944700 |

|   |             |             |             |
|---|-------------|-------------|-------------|
| C | -2.72939900 | -0.49909400 | 0.00069400  |
| F | -2.77877600 | -1.33808800 | 1.04684600  |
| F | -2.83717300 | -1.22976100 | -1.12042700 |
| F | -3.79707500 | 0.32447900  | 0.06968500  |

Anisole

0 1

|   |             |             |             |
|---|-------------|-------------|-------------|
| C | 0.03608700  | 1.06137600  | -0.00022600 |
| C | -1.33154500 | 1.35203900  | -0.00001900 |
| C | -2.28032800 | 0.33321600  | 0.00013600  |
| C | -1.85147600 | -0.99839500 | 0.00016200  |
| C | -0.49597200 | -1.30398000 | -0.00004600 |
| C | 0.45483300  | -0.27362100 | -0.00023500 |
| H | 0.75516300  | 1.87195400  | -0.00039900 |
| H | -1.64886800 | 2.39136100  | -0.00003900 |
| H | -3.34007700 | 0.56920000  | 0.00024500  |
| H | -2.57934200 | -1.80515100 | 0.00029400  |
| H | -0.14478500 | -2.33085400 | -0.00004000 |
| O | 1.76036700  | -0.67517000 | -0.00028700 |
| C | 2.76201300  | 0.32686900  | 0.00035200  |
| H | 2.69838500  | 0.96064600  | 0.89492600  |
| H | 3.71645900  | -0.20237800 | 0.00014700  |
| H | 2.69846000  | 0.96155600  | -0.89359000 |

Pre\_TS1<sup>m</sup>

0 1

|    |             |             |             |
|----|-------------|-------------|-------------|
| C  | -3.76223000 | 0.39351800  | 1.45756400  |
| C  | -4.47940300 | 1.53980600  | 1.11695700  |
| C  | -3.92404700 | 2.83013300  | 1.33096600  |
| C  | -2.63763700 | 2.96305500  | 1.78972900  |
| C  | -1.84229800 | 1.80702800  | 2.04215500  |
| H  | -0.91168200 | 1.91503300  | 2.59095600  |
| C  | -2.44552200 | 0.52506000  | 1.92320000  |
| H  | -1.93205800 | -0.37598700 | 2.24700300  |
| Pd | -0.94595200 | 1.11914800  | 0.02365800  |
| O  | -2.44851100 | 1.92524400  | -1.03197600 |
| C  | -3.12356600 | 1.24368500  | -1.90222500 |
| O  | -3.07819600 | 0.01311400  | -2.07223700 |
| Ag | -2.33404000 | -1.61156900 | -0.67334400 |
| O  | -3.29463300 | -2.93764400 | 0.76260900  |
| C  | -2.59300000 | -3.09927200 | 1.82213500  |
| O  | -1.52122800 | -2.50116200 | 2.07807500  |
| C  | -3.13440700 | -4.11752000 | 2.81775400  |
| H  | -2.64908200 | -4.00866600 | 3.78974800  |

|   |             |             |             |
|---|-------------|-------------|-------------|
| H | -4.21861600 | -4.01450300 | 2.91937100  |
| H | -2.93818400 | -5.12588300 | 2.43510200  |
| C | -4.08702000 | 2.08764700  | -2.71233300 |
| H | -4.46925100 | 1.51096200  | -3.55582500 |
| H | -4.92111800 | 2.38215800  | -2.06489800 |
| H | -3.59599000 | 2.99876600  | -3.06320600 |
| H | -4.53498700 | 3.69319600  | 1.08962300  |
| N | 0.73284700  | 0.45717200  | 1.01658200  |
| C | 1.86287800  | 1.24000900  | 1.06038800  |
| C | 0.78390200  | -0.77032300 | 1.51045600  |
| C | 1.88072300  | 2.54235800  | 0.50862000  |
| C | 3.04395900  | 0.70598100  | 1.65857100  |
| C | 1.97804800  | -1.25746000 | 2.10689300  |
| H | -0.10685600 | -1.39640600 | 1.46449100  |
| C | 3.03908700  | 3.28126100  | 0.53821200  |
| H | 0.98347100  | 2.93036700  | 0.03876000  |
| C | 4.22318200  | 1.48473300  | 1.68154300  |
| N | 3.07971500  | -0.54820800 | 2.18844200  |
| H | 1.98981700  | -2.26735700 | 2.50573800  |
| C | 4.22340100  | 2.75137400  | 1.12566400  |
| H | 3.06761600  | 4.27281300  | 0.10079000  |
| H | 5.11284100  | 1.05000700  | 2.12169400  |
| C | 5.42101500  | 3.53721700  | 1.12613000  |
| N | 6.38788400  | 4.18229100  | 1.12688800  |
| N | 4.34410600  | 0.85616100  | -1.80592500 |
| C | 3.06004700  | 0.73902900  | -2.15434800 |
| C | 4.89935300  | -0.15884900 | -1.13380100 |
| C | 2.29052700  | -0.38622500 | -1.84186900 |
| H | 2.61455000  | 1.57729400  | -2.68240000 |
| C | 4.20843800  | -1.32264800 | -0.78792700 |
| H | 5.93777500  | -0.03103100 | -0.83976700 |
| C | 2.87027600  | -1.44697800 | -1.15752400 |
| S | 0.55214500  | -0.43286300 | -2.28647000 |
| C | 4.90375800  | -2.40652900 | -0.01203800 |
| H | 2.28167100  | -2.31826800 | -0.89614200 |
| O | 0.44969300  | -0.51002200 | -3.74087300 |
| O | -0.01246900 | -1.54723800 | -1.47775600 |
| O | 0.05410000  | 0.94336200  | -1.78353600 |
| F | 5.63619300  | -3.20527500 | -0.81449700 |
| F | 4.01971100  | -3.19411300 | 0.63983300  |
| F | 5.74510500  | -1.88308200 | 0.90531900  |
| H | -4.17436100 | -0.60049800 | 1.34240900  |
| H | -2.21112000 | 3.94935700  | 1.94241600  |
| O | -5.70481900 | 1.52752100  | 0.56160700  |

|   |             |             |             |
|---|-------------|-------------|-------------|
| C | -6.26754100 | 0.25926500  | 0.20353900  |
| H | -6.45656900 | -0.35048800 | 1.09358900  |
| H | -7.21037400 | 0.48886700  | -0.29233600 |
| H | -5.60214700 | -0.27823200 | -0.48028800 |

TS1<sup>m</sup>

0 1

|    |             |             |             |
|----|-------------|-------------|-------------|
| C  | -3.78084000 | 1.29426200  | 0.44972300  |
| C  | -4.65788400 | 2.37089300  | 0.53388700  |
| C  | -4.15572500 | 3.64734000  | 0.84643300  |
| C  | -2.79731800 | 3.83794700  | 1.08226700  |
| C  | -1.91678900 | 2.76042600  | 0.99698900  |
| H  | -0.86183900 | 2.91293000  | 1.20206400  |
| C  | -2.39063700 | 1.46632800  | 0.67926300  |
| H  | -2.03474800 | 0.60612700  | 1.61826200  |
| Pd | -1.12632900 | 0.41162300  | -0.62168300 |
| O  | -2.63666500 | 0.28379900  | -1.97768200 |
| C  | -3.16974500 | -0.83314600 | -2.31283300 |
| O  | -3.12405500 | -1.91048500 | -1.66806700 |
| Ag | -2.16502400 | -2.13277800 | 0.26547700  |
| O  | -1.92458400 | -2.09170400 | 2.41770100  |
| C  | -1.95461100 | -1.10104000 | 3.19876800  |
| O  | -1.87239100 | 0.12926600  | 2.86675100  |
| C  | -2.08929300 | -1.37843500 | 4.68378500  |
| H  | -1.51411500 | -0.65223900 | 5.26306600  |
| H  | -3.14349100 | -1.26811200 | 4.96425000  |
| H  | -1.77340700 | -2.39766900 | 4.91325900  |
| C  | -3.91162700 | -0.81781100 | -3.63205400 |
| H  | -4.68790300 | -1.58525500 | -3.64155100 |
| H  | -4.33538300 | 0.16925800  | -3.82961000 |
| H  | -3.19016300 | -1.04383600 | -4.42586700 |
| H  | -4.85836300 | 4.47277600  | 0.90577200  |
| N  | 0.54900100  | 0.62367100  | 0.56208500  |
| C  | 1.50480100  | 1.56161900  | 0.25471100  |
| C  | 0.79372700  | -0.22289600 | 1.54831700  |
| C  | 1.33544500  | 2.44971400  | -0.83308300 |
| C  | 2.70159700  | 1.60944300  | 1.03252700  |
| C  | 1.98362000  | -0.13090800 | 2.31370700  |
| H  | 0.06823700  | -0.99935700 | 1.73677800  |
| C  | 2.33331300  | 3.33953100  | -1.14919500 |
| H  | 0.42479100  | 2.39333100  | -1.42038900 |
| C  | 3.71173000  | 2.53876400  | 0.69500700  |
| N  | 2.91555900  | 0.76278900  | 2.07685500  |
| H  | 2.15161300  | -0.83598000 | 3.12263100  |

|   |             |             |             |
|---|-------------|-------------|-------------|
| C | 3.53417700  | 3.38610200  | -0.38368200 |
| H | 2.22207400  | 4.00992600  | -1.99388600 |
| H | 4.61975200  | 2.54382100  | 1.28633900  |
| C | 4.56317800  | 4.31494400  | -0.74500500 |
| N | 5.39189700  | 5.07439200  | -1.04079200 |
| N | 4.16089100  | 0.31929500  | -2.05156000 |
| C | 2.96133900  | -0.22849200 | -2.26750900 |
| C | 4.86245200  | -0.11965900 | -1.00038900 |
| C | 2.42343300  | -1.22751300 | -1.44878200 |
| H | 2.38851000  | 0.15437300  | -3.10689500 |
| C | 4.40710300  | -1.11676400 | -0.13449000 |
| H | 5.82256500  | 0.35908200  | -0.82729800 |
| C | 3.16063600  | -1.69542100 | -0.36893400 |
| S | 0.76952000  | -1.85535000 | -1.77141200 |
| C | 5.24409100  | -1.53408300 | 1.04164400  |
| H | 2.75172300  | -2.45612300 | 0.28552400  |
| O | 0.83583600  | -2.74787800 | -2.92740900 |
| O | 0.31792900  | -2.43669800 | -0.47578600 |
| O | 0.00712300  | -0.56379600 | -2.10966700 |
| F | 6.16188700  | -2.46226000 | 0.70287700  |
| F | 4.48272400  | -2.06652900 | 2.02576800  |
| F | 5.91228600  | -0.48316300 | 1.56288300  |
| H | -4.14564800 | 0.30184800  | 0.21854000  |
| H | -2.43134700 | 4.82967100  | 1.33189000  |
| O | -6.00034800 | 2.29837600  | 0.32968500  |
| C | -6.54207800 | 1.03964200  | -0.04741500 |
| H | -6.39547100 | 0.28871500  | 0.73980900  |
| H | -7.60974100 | 1.20614200  | -0.19512500 |
| H | -6.09355600 | 0.67684100  | -0.98099200 |

Pro 1<sup>m</sup>

0 1

|    |             |             |             |
|----|-------------|-------------|-------------|
| C  | -3.55251500 | 1.36603300  | 0.37411400  |
| C  | -4.41493600 | 2.06625100  | 1.23464400  |
| C  | -3.92414000 | 3.12587500  | 2.00956100  |
| C  | -2.58476600 | 3.47978300  | 1.90686100  |
| C  | -1.71411500 | 2.79056900  | 1.05134600  |
| H  | -0.67557000 | 3.09944700  | 0.99162800  |
| C  | -2.19432000 | 1.73297700  | 0.27175900  |
| H  | -2.91009500 | 0.20016800  | 2.05100700  |
| Pd | -1.01776100 | 0.70550600  | -0.95491400 |
| O  | -2.45378100 | 0.70454400  | -2.40476400 |
| C  | -3.30953300 | -0.22142100 | -2.60640400 |
| O  | -3.52939600 | -1.22075700 | -1.86909300 |

|    |             |             |             |
|----|-------------|-------------|-------------|
| Ag | -2.14422700 | -1.84123900 | -0.27078200 |
| O  | -2.17436900 | -2.08579500 | 2.05985100  |
| C  | -2.52787400 | -1.42114100 | 3.03254700  |
| O  | -2.89478800 | -0.14894400 | 2.97778600  |
| C  | -2.58160800 | -1.98129500 | 4.42748400  |
| H  | -2.05304200 | -1.31914400 | 5.11961500  |
| H  | -3.62566500 | -2.02831700 | 4.75590000  |
| H  | -2.14646600 | -2.98038100 | 4.44310200  |
| C  | -4.12595800 | -0.08190200 | -3.87532600 |
| H  | -5.09073100 | -0.58078300 | -3.76415600 |
| H  | -4.25929000 | 0.96955500  | -4.13785100 |
| H  | -3.57760700 | -0.57046600 | -4.68920000 |
| H  | -4.60485300 | 3.64967600  | 2.67193000  |
| N  | 0.54551800  | 0.80045000  | 0.39242100  |
| C  | 1.64483200  | 1.58118600  | 0.13582800  |
| C  | 0.55786900  | 0.04422600  | 1.47808700  |
| C  | 1.70876000  | 2.38984000  | -1.02353600 |
| C  | 2.74217700  | 1.55917900  | 1.05002800  |
| C  | 1.65971500  | 0.04992100  | 2.36745600  |
| H  | -0.29651100 | -0.59409100 | 1.65100600  |
| C  | 2.83562900  | 3.13349700  | -1.27490600 |
| H  | 0.86596700  | 2.39071500  | -1.70762600 |
| C  | 3.89145600  | 2.33484100  | 0.77340400  |
| N  | 2.72753300  | 0.79035500  | 2.17266200  |
| H  | 1.64321700  | -0.59058400 | 3.24492200  |
| C  | 3.94012900  | 3.10506500  | -0.37399200 |
| H  | 2.90204400  | 3.74365600  | -2.16849500 |
| H  | 4.72190200  | 2.28393800  | 1.46758300  |
| C  | 5.11057100  | 3.87569500  | -0.67112900 |
| N  | 6.05651200  | 4.50556800  | -0.91502900 |
| N  | 4.41676200  | -0.05290000 | -1.78372700 |
| C  | 3.19745600  | -0.48860200 | -2.11461200 |
| C  | 4.93361400  | -0.47730000 | -0.62537400 |
| C  | 2.45751400  | -1.35985800 | -1.30849700 |
| H  | 2.77572700  | -0.11523900 | -3.04324300 |
| C  | 4.26714700  | -1.34766100 | 0.24077200  |
| H  | 5.91456500  | -0.08918100 | -0.36410900 |
| C  | 3.00171000  | -1.81231400 | -0.11319700 |
| S  | 0.80290600  | -1.84728700 | -1.81065100 |
| C  | 4.90389700  | -1.74933800 | 1.54097800  |
| H  | 2.43418400  | -2.47286800 | 0.53098800  |
| O  | 0.92033100  | -2.85032400 | -2.86869900 |
| O  | 0.16630200  | -2.31396100 | -0.52808600 |
| O  | 0.19765600  | -0.54222000 | -2.29842700 |



|   |             |             |             |
|---|-------------|-------------|-------------|
| F | 5.76574700  | -2.77499100 | 1.38523000  |
| F | 3.97725700  | -2.14107800 | 2.44642400  |
| F | 5.59782200  | -0.72454200 | 2.08163000  |
| H | -3.93963700 | 0.56882900  | -0.24431200 |
| H | -2.20548400 | 4.30594600  | 2.50281800  |
| O | -5.73342300 | 1.76807700  | 1.38971400  |
| C | -6.27419600 | 0.71065200  | 0.61040200  |
| H | -5.78639100 | -0.24659600 | 0.83749700  |
| H | -7.33012000 | 0.65264600  | 0.87802500  |
| H | -6.17801400 | 0.91226700  | -0.46370600 |

Pre\_TS1P

0 1

|    |             |             |             |
|----|-------------|-------------|-------------|
| C  | -3.54469400 | 0.00035700  | 1.65438000  |
| C  | -4.62505500 | 0.71780900  | 1.20592300  |
| C  | -4.52478900 | 2.12203700  | 1.03848000  |
| C  | -3.35812900 | 2.80775200  | 1.40293000  |
| C  | -2.26308700 | 2.07950600  | 1.86683600  |
| H  | -5.56274800 | 0.23816200  | 0.94643500  |
| H  | -3.28597700 | 3.88304100  | 1.30428700  |
| H  | -1.37732300 | 2.60709900  | 2.20915100  |
| C  | -2.31117100 | 0.66005600  | 1.94827800  |
| H  | -1.58482900 | 0.10567200  | 2.53008700  |
| Pd | -1.17655500 | 0.70537200  | -0.00783000 |
| O  | -2.78180400 | 1.21369300  | -1.10340100 |
| C  | -3.35664700 | 0.38481600  | -1.91004700 |
| O  | -3.14927300 | -0.84092200 | -1.97978600 |
| Ag | -2.18108400 | -2.20480700 | -0.56069200 |
| O  | -2.02955300 | -3.85815200 | 0.80425900  |
| C  | -1.75824400 | -3.49060600 | 1.99765400  |
| O  | -1.55431300 | -2.30375100 | 2.35735400  |
| C  | -1.65978600 | -4.61434700 | 3.02170100  |
| H  | -1.63462500 | -4.21553100 | 4.03778800  |
| H  | -2.49937400 | -5.30577200 | 2.90659500  |
| H  | -0.74268400 | -5.18670400 | 2.83864600  |
| C  | -4.38622300 | 1.03016800  | -2.81340100 |
| H  | -4.89226900 | 0.27116300  | -3.41103100 |
| H  | -5.11343900 | 1.57666300  | -2.20367000 |
| H  | -3.89148900 | 1.75137300  | -3.47183700 |
| N  | 0.58559800  | 0.40817500  | 1.01342800  |
| C  | 1.57780300  | 1.35920400  | 0.97456300  |
| C  | 0.83178300  | -0.75349300 | 1.59890000  |
| C  | 1.38322900  | 2.60619400  | 0.33470700  |
| C  | 2.83368600  | 1.06368800  | 1.58545000  |

|   |             |             |             |
|---|-------------|-------------|-------------|
| C | 2.09825400  | -1.00700900 | 2.18965400  |
| H | 0.02010500  | -1.48025900 | 1.64937100  |
| C | 2.40636600  | 3.52258400  | 0.29918200  |
| H | 0.43551400  | 2.80807700  | -0.15169200 |
| C | 3.87204200  | 2.02171100  | 1.53806400  |
| N | 3.07563100  | -0.13041200 | 2.19351300  |
| H | 2.27954100  | -1.97089100 | 2.65628600  |
| C | 3.66361000  | 3.23223000  | 0.90263800  |
| H | 2.27295500  | 4.47336900  | -0.20440900 |
| H | 4.82354200  | 1.76462700  | 1.98827700  |
| C | 4.71736800  | 4.19984700  | 0.83284600  |
| N | 5.56546200  | 4.99268400  | 0.77665700  |
| N | 4.14393100  | 1.26846000  | -1.91353200 |
| C | 2.89237100  | 0.93154900  | -2.23702100 |
| C | 4.85101700  | 0.39822100  | -1.18345200 |
| C | 2.30614600  | -0.27465400 | -1.84163300 |
| H | 2.32184300  | 1.65345700  | -2.81453400 |
| C | 4.34902500  | -0.83235200 | -0.75325600 |
| H | 5.85811300  | 0.70390100  | -0.91197700 |
| C | 3.04531800  | -1.18524800 | -1.09717200 |
| S | 0.59433600  | -0.62682100 | -2.25649000 |
| C | 5.20554500  | -1.73876500 | 0.08584000  |
| H | 2.59831400  | -2.11806300 | -0.77480200 |
| O | 0.49845600  | -0.76424100 | -3.70800000 |
| O | 0.22610400  | -1.78184700 | -1.40275300 |
| O | -0.12132700 | 0.66934600  | -1.79622300 |
| F | 6.07493000  | -2.44471800 | -0.66541700 |
| F | 4.45887600  | -2.62750500 | 0.77820600  |
| F | 5.93363100  | -1.02992600 | 0.97629600  |
| O | -5.61995800 | 2.70984100  | 0.52445300  |
| C | -5.58927200 | 4.11272600  | 0.26672500  |
| H | -4.78198100 | 4.36121600  | -0.43137500 |
| H | -6.55343800 | 4.35035600  | -0.18250700 |
| H | -5.46709200 | 4.68109100  | 1.19586800  |
| H | -3.58628000 | -1.07275100 | 1.79950200  |

TS1P

0 1

|   |             |            |            |
|---|-------------|------------|------------|
| C | -3.98267700 | 0.66884000 | 0.14476000 |
| C | -4.98152000 | 1.61759900 | 0.15887400 |
| C | -4.65754500 | 2.97301000 | 0.37349300 |
| C | -3.32245100 | 3.35442600 | 0.59824900 |
| C | -2.33497300 | 2.38004300 | 0.59438500 |
| H | -6.02336100 | 1.35644900 | 0.00436500 |

|    |             |             |             |
|----|-------------|-------------|-------------|
| H  | -3.06123700 | 4.39034600  | 0.77802300  |
| H  | -1.31204100 | 2.68797100  | 0.79185900  |
| C  | -2.61528100 | 1.00395700  | 0.38228500  |
| H  | -2.25177800 | 0.33582200  | 1.48559900  |
| Pd | -1.19036500 | 0.00472200  | -0.74939000 |
| O  | -2.61699600 | -0.50496600 | -2.10606800 |
| C  | -2.95264400 | -1.72550500 | -2.31712900 |
| O  | -2.77088400 | -2.69797000 | -1.54332000 |
| Ag | -1.89478400 | -2.52595400 | 0.43607000  |
| O  | -1.76869000 | -2.19082100 | 2.57793600  |
| C  | -1.99552200 | -1.14115500 | 3.23749000  |
| O  | -2.09921500 | 0.04362100  | 2.76783100  |
| C  | -2.15500100 | -1.27099300 | 4.74008200  |
| H  | -1.74056600 | -0.39654000 | 5.24738100  |
| H  | -3.22534100 | -1.31628800 | 4.97359200  |
| H  | -1.68317400 | -2.18826100 | 5.09688900  |
| C  | -3.61800700 | -1.98575500 | -3.65125800 |
| H  | -4.26881200 | -2.85979100 | -3.58781600 |
| H  | -4.17502600 | -1.10841400 | -3.98676300 |
| H  | -2.82961400 | -2.19173800 | -4.38462700 |
| N  | 0.38435200  | 0.59683000  | 0.44765400  |
| C  | 1.22598000  | 1.60618600  | 0.04636000  |
| C  | 0.68833500  | -0.07161800 | 1.54790500  |
| C  | 0.99506900  | 2.31436600  | -1.15622500 |
| C  | 2.36639700  | 1.91734200  | 0.84725600  |
| C  | 1.81935100  | 0.27720900  | 2.32867300  |
| H  | 0.05827500  | -0.90441100 | 1.82096200  |
| C  | 1.88035000  | 3.28526300  | -1.55740500 |
| H  | 0.13056400  | 2.05492000  | -1.75880500 |
| C  | 3.26023200  | 2.92554100  | 0.41988400  |
| N  | 2.63835400  | 1.25006600  | 2.00248400  |
| H  | 2.03807300  | -0.28792200 | 3.23014700  |
| C  | 3.02482600  | 3.59533100  | -0.76719900 |
| H  | 1.72404300  | 3.81878900  | -2.48813800 |
| H  | 4.13007200  | 3.13063400  | 1.03270900  |
| C  | 3.93679300  | 4.60478000  | -1.21605300 |
| N  | 4.66860100  | 5.42985300  | -1.58323000 |
| N  | 4.13001200  | 0.47141600  | -2.00414400 |
| C  | 3.02724100  | -0.26346200 | -2.17745000 |
| C  | 4.83519200  | 0.27551500  | -0.88428000 |
| C  | 2.59233700  | -1.21386100 | -1.24743200 |
| H  | 2.44682000  | -0.07706300 | -3.07614500 |
| C  | 4.47922300  | -0.65444600 | 0.09539700  |
| H  | 5.71258900  | 0.90274000  | -0.75073400 |

|   |             |             |             |
|---|-------------|-------------|-------------|
| C | 3.33517400  | -1.42830600 | -0.09383400 |
| S | 1.05654700  | -2.10741900 | -1.52948800 |
| C | 5.30912600  | -0.79290800 | 1.34012500  |
| H | 3.00281600  | -2.14732700 | 0.64555800  |
| O | 1.30584600  | -3.13120400 | -2.54348100 |
| O | 0.63076000  | -2.56933500 | -0.17723200 |
| O | 0.14311700  | -0.99693700 | -2.06447400 |
| F | 6.36251900  | -1.61471500 | 1.15518100  |
| F | 4.58396200  | -1.29858800 | 2.36469000  |
| F | 5.79996500  | 0.40149800  | 1.73538700  |
| O | -5.69869300 | 3.82717600  | 0.35874700  |
| C | -5.45265300 | 5.21636900  | 0.55894100  |
| H | -4.79306600 | 5.61684000  | -0.21964100 |
| H | -6.42765600 | 5.70008900  | 0.49684400  |
| H | -5.01269400 | 5.40138600  | 1.54589900  |
| H | -4.24533200 | -0.37093800 | -0.02026100 |

Pro 1<sup>p</sup>

0 1

|    |             |             |             |
|----|-------------|-------------|-------------|
| C  | -3.78857700 | 0.77156200  | -0.55040000 |
| C  | -4.77701400 | 1.67037000  | -0.14936500 |
| C  | -4.45039900 | 3.00174500  | 0.13932500  |
| C  | -3.12016700 | 3.41907300  | 0.02011900  |
| C  | -2.13523600 | 2.50608300  | -0.37369600 |
| H  | -5.81213800 | 1.35668300  | -0.05584700 |
| H  | -2.83598800 | 4.44410600  | 0.22879900  |
| H  | -1.11551400 | 2.86863500  | -0.46032300 |
| C  | -2.43895400 | 1.16928500  | -0.66541600 |
| H  | -3.18336900 | 0.60890100  | 1.57207900  |
| Pd | -1.04778300 | -0.14144000 | -1.21485600 |
| O  | -2.33891600 | -1.04435500 | -2.50688700 |
| C  | -2.99371000 | -2.11544800 | -2.26351900 |
| O  | -3.13324400 | -2.67745300 | -1.14533900 |
| Ag | -1.97419500 | -2.11741500 | 0.63382100  |
| O  | -2.12568500 | -1.19007200 | 2.75590600  |
| C  | -2.70134100 | -0.21945200 | 3.24706400  |
| O  | -3.25031500 | 0.76088800  | 2.54605600  |
| C  | -2.85088300 | -0.02820500 | 4.73113700  |
| H  | -2.56435600 | 0.98900100  | 5.01292900  |
| H  | -3.90430700 | -0.15838300 | 5.00305000  |
| H  | -2.24460100 | -0.76175800 | 5.26231400  |
| C  | -3.65200100 | -2.75634300 | -3.46823800 |
| H  | -4.53136700 | -3.32637700 | -3.16227000 |
| H  | -3.91647700 | -2.00322600 | -4.21322300 |

|   |             |             |             |
|---|-------------|-------------|-------------|
| H | -2.93218500 | -3.44824300 | -3.92094100 |
| N | 0.38913000  | 0.79648300  | -0.06367500 |
| C | 1.42385500  | 1.47715500  | -0.65611200 |
| C | 0.39959100  | 0.67085800  | 1.25369900  |
| C | 1.49055200  | 1.61997600  | -2.06232600 |
| C | 2.45108400  | 2.03418400  | 0.16547200  |
| C | 1.43140600  | 1.23906700  | 2.03975900  |
| H | -0.39922100 | 0.10187100  | 1.70732000  |
| C | 2.55454600  | 2.27583900  | -2.63142500 |
| H | 0.70252100  | 1.18612900  | -2.66966200 |
| C | 3.53549200  | 2.70877800  | -0.44102300 |
| N | 2.43287600  | 1.91312100  | 1.52084300  |
| H | 1.41685900  | 1.10799900  | 3.11825300  |
| C | 3.58977900  | 2.82261400  | -1.81802500 |
| H | 2.62437600  | 2.37607000  | -3.70860200 |
| H | 4.31572000  | 3.10225700  | 0.19971900  |
| C | 4.69680600  | 3.48636800  | -2.43929400 |
| N | 5.59057300  | 4.02824400  | -2.94782800 |
| N | 4.51371800  | -0.51648900 | -1.46466400 |
| C | 3.37057000  | -1.20142900 | -1.56508400 |
| C | 4.97686000  | -0.25987500 | -0.23620300 |
| C | 2.65536600  | -1.65382200 | -0.45129100 |
| H | 2.98900900  | -1.37958600 | -2.56622400 |
| C | 4.33057400  | -0.67407100 | 0.93091900  |
| H | 5.89341800  | 0.32128300  | -0.17813100 |
| C | 3.14572700  | -1.40028500 | 0.82329900  |
| S | 1.09605000  | -2.51737600 | -0.68191400 |
| C | 4.89888400  | -0.31471000 | 2.27430800  |
| H | 2.59400400  | -1.72787800 | 1.69607000  |
| O | 1.38976600  | -3.88232100 | -1.11829600 |
| O | 0.41425100  | -2.38100400 | 0.65136200  |
| O | 0.40963500  | -1.69051100 | -1.75719300 |
| F | 5.86044600  | -1.17698300 | 2.66315900  |
| F | 3.94483400  | -0.32249100 | 3.23453500  |
| F | 5.45233900  | 0.91723400  | 2.25676400  |
| O | -5.48444100 | 3.80011200  | 0.52639400  |
| C | -5.20399500 | 5.16153000  | 0.80538400  |
| H | -4.79843400 | 5.67715400  | -0.07498200 |
| H | -6.15758300 | 5.61393700  | 1.08190400  |
| H | -4.49748600 | 5.26411900  | 1.63984000  |
| H | -4.07846100 | -0.24663000 | -0.78092500 |

Int Pd1

0 1

|    |             |             |             |
|----|-------------|-------------|-------------|
| C  | -2.78080100 | -2.91523200 | 1.49084300  |
| C  | -1.62378900 | -2.19022500 | 1.10624500  |
| C  | -2.97820000 | -0.56955600 | 0.14753400  |
| C  | -4.11965800 | -1.33395500 | 0.54442200  |
| C  | -5.41420200 | -0.86242400 | 0.22640000  |
| H  | -6.26730400 | -1.45584100 | 0.53355500  |
| C  | -5.56192500 | 0.32998900  | -0.46002100 |
| C  | -4.41851400 | 1.08773400  | -0.84632100 |
| C  | -3.15037400 | 0.64710400  | -0.55285900 |
| H  | -4.55991000 | 2.02485700  | -1.37307300 |
| H  | -2.28175400 | 1.24257200  | -0.81407000 |
| H  | -0.62162400 | -2.56055100 | 1.28675300  |
| H  | -2.66487000 | -3.85237000 | 2.02931900  |
| N  | -1.72611700 | -1.04364900 | 0.45317200  |
| N  | -4.00118300 | -2.50939300 | 1.22317700  |
| Pd | 0.00004100  | -0.00001000 | 0.00001400  |
| O  | 1.05711200  | -2.87003200 | -0.01052700 |
| C  | 0.88107200  | -2.47445300 | -1.17025200 |
| O  | 0.44417900  | -1.29075800 | -1.50184500 |
| C  | 1.20174000  | -3.35378400 | -2.36724600 |
| H  | 2.11855700  | -2.98983000 | -2.84526000 |
| H  | 1.35328800  | -4.38530800 | -2.04470200 |
| H  | 0.40174900  | -3.29970800 | -3.11095800 |
| O  | -1.05740400 | 2.86985200  | 0.01042300  |
| C  | -0.88131900 | 2.47435900  | 1.17016700  |
| O  | -0.44416100 | 1.29077200  | 1.50182500  |
| C  | -1.20222600 | 3.35364300  | 2.36713000  |
| H  | -0.40187400 | 3.30031600  | 3.11051400  |
| H  | -1.35468300 | 4.38499800  | 2.04447700  |
| H  | -2.11854000 | 2.98904300  | 2.84560800  |
| C  | -6.87081600 | 0.81522200  | -0.78474600 |
| N  | -7.92830700 | 1.21692100  | -1.05269300 |
| C  | 2.78081000  | 2.91565000  | -1.49011800 |
| C  | 1.62382000  | 2.19047700  | -1.10576400 |
| C  | 2.97827900  | 0.56955000  | -0.14755400 |
| C  | 4.11971000  | 1.33414000  | -0.54415100 |
| C  | 5.41426900  | 0.86256000  | -0.22626200 |
| H  | 6.26734800  | 1.45612500  | -0.53319600 |
| C  | 5.56203400  | -0.33008300 | 0.45975100  |
| C  | 4.41864800  | -1.08801000 | 0.84576400  |
| C  | 3.15049200  | -0.64734100 | 0.55242300  |
| H  | 4.56007100  | -2.02530700 | 1.37220000  |
| H  | 2.28190100  | -1.24294500 | 0.81343500  |
| H  | 0.62164200  | 2.56083000  | -1.28616300 |

|   |            |             |             |
|---|------------|-------------|-------------|
| H | 2.66484800 | 3.85298300  | -2.02824700 |
| N | 1.72617900 | 1.04369600  | -0.45305600 |
| N | 4.00120300 | 2.50979500  | -1.22252600 |
| C | 6.87094000 | -0.81536300 | 0.78434600  |
| N | 7.92844500 | -1.21710200 | 1.05218000  |

Pre\_TS<sup>Pd</sup>

0 1

|    |             |             |             |
|----|-------------|-------------|-------------|
| C  | 1.96315600  | -2.19246100 | 2.53459400  |
| C  | 0.82746900  | -1.53805500 | 1.99724100  |
| C  | 2.18561800  | -0.43479000 | 0.48042000  |
| C  | 3.31129200  | -1.11023600 | 1.04894600  |
| C  | 4.60103500  | -0.87108500 | 0.52019500  |
| H  | 5.44387400  | -1.38887100 | 0.96250800  |
| C  | 4.75418300  | 0.00464600  | -0.53954400 |
| C  | 3.62344000  | 0.66391200  | -1.10588400 |
| C  | 2.36112800  | 0.44685500  | -0.61111500 |
| H  | 3.77022200  | 1.34053100  | -1.94020700 |
| H  | 1.50212000  | 0.94965000  | -1.04084700 |
| H  | -0.16955900 | -1.72950800 | 2.37591500  |
| H  | 1.83875000  | -2.89368600 | 3.35622100  |
| N  | 0.94322400  | -0.67333100 | 1.00537800  |
| N  | 3.18035800  | -1.98615800 | 2.08362400  |
| Pd | -0.78079500 | 0.22909700  | 0.26964600  |
| O  | 0.36376600  | 2.85448000  | -1.00138100 |
| C  | 0.28600900  | 2.94278800  | 0.22679900  |
| O  | -0.16312500 | 2.01001500  | 1.02605600  |
| C  | 0.75683000  | 4.18382800  | 0.97026600  |
| H  | 0.03362300  | 4.47415900  | 1.73761700  |
| H  | 1.70232200  | 3.96066300  | 1.47815200  |
| H  | 0.91457400  | 5.00269100  | 0.26616600  |
| C  | -4.30505000 | -0.54102100 | -0.75281500 |
| C  | -3.74838600 | -0.59244100 | -2.04181200 |
| C  | -2.72627600 | 0.25981100  | -2.43496400 |
| C  | -2.24153700 | 1.21288400  | -1.52564500 |
| C  | -2.76608800 | 1.26777100  | -0.21043700 |
| C  | -3.82279400 | 0.38587100  | 0.16208400  |
| H  | -5.10008500 | -1.22718300 | -0.48903200 |
| H  | -4.13769800 | -1.32486200 | -2.74400300 |
| H  | -2.30136000 | 0.19659300  | -3.43021700 |
| H  | -1.48613100 | 1.93488600  | -1.81781400 |
| H  | -2.56259600 | 2.11291700  | 0.43858200  |
| O  | -4.28661700 | 0.55153800  | 1.42262300  |
| C  | -5.28577200 | -0.34598600 | 1.88996600  |

|   |             |             |             |
|---|-------------|-------------|-------------|
| H | -5.48495300 | -0.05819300 | 2.92259500  |
| H | -6.20685900 | -0.25622900 | 1.30072800  |
| H | -4.92878200 | -1.38248000 | 1.85643400  |
| C | 6.05838700  | 0.25421600  | -1.07913500 |
| N | 7.11351600  | 0.46363800  | -1.52015100 |
| O | -1.43731900 | -1.61775700 | -0.18854900 |
| C | -0.79612500 | -2.17819000 | -1.18887100 |
| O | 0.15252700  | -1.67579000 | -1.78631900 |
| C | -1.37266400 | -3.53280200 | -1.57131100 |
| H | -1.59459400 | -4.13044900 | -0.68233100 |
| H | -2.31624300 | -3.37647200 | -2.10676300 |
| H | -0.67674000 | -4.06461200 | -2.22271000 |

TS<sup>Pd1</sup>

0 1

|    |             |             |             |
|----|-------------|-------------|-------------|
| C  | -2.57186000 | -2.55128700 | 1.91946900  |
| C  | -1.35231400 | -2.03826800 | 1.41182000  |
| C  | -2.51510600 | -0.39742900 | 0.27732500  |
| C  | -3.73127600 | -0.94109300 | 0.80042600  |
| C  | -4.96415900 | -0.34535300 | 0.44787500  |
| H  | -5.87628100 | -0.76948800 | 0.85098800  |
| C  | -4.97831100 | 0.75183000  | -0.39547500 |
| C  | -3.76109600 | 1.28716800  | -0.90988700 |
| C  | -2.55026300 | 0.72448800  | -0.58446900 |
| H  | -3.79931500 | 2.15292100  | -1.56178000 |
| H  | -1.61967900 | 1.15218900  | -0.95133900 |
| H  | -0.40152100 | -2.49873400 | 1.65578800  |
| H  | -2.55794800 | -3.41665400 | 2.57794800  |
| N  | -1.32406400 | -0.98499800 | 0.61497300  |
| N  | -3.73996600 | -2.02348400 | 1.62807500  |
| Pd | 0.59497500  | -0.35102400 | -0.05934700 |
| O  | 2.74037800  | -1.96223900 | -1.80204800 |
| C  | 1.68493500  | -2.63556800 | -1.59607900 |
| O  | 0.68085100  | -2.22289800 | -0.93774500 |
| C  | 1.62862500  | -4.04142500 | -2.14843500 |
| H  | 2.18235500  | -4.70495600 | -1.47415700 |
| H  | 0.59605000  | -4.38719200 | -2.21627100 |
| H  | 2.11332700  | -4.07881800 | -3.12656900 |
| C  | 4.35337200  | 1.39451600  | 0.68686900  |
| C  | 4.38827300  | 2.41548800  | -0.26588700 |
| C  | 3.52404700  | 2.41899700  | -1.36386900 |
| C  | 2.60058100  | 1.38764100  | -1.49676200 |
| C  | 2.52205000  | 0.33372700  | -0.55883600 |
| C  | 3.41824800  | 0.36549600  | 0.54398300  |



|   |             |             |             |
|---|-------------|-------------|-------------|
| H | 5.03894400  | 1.42357900  | 1.52532400  |
| H | 5.11124700  | 3.21829400  | -0.14547800 |
| H | 3.56790800  | 3.21977000  | -2.09509300 |
| H | 1.91512100  | 1.38353800  | -2.33718200 |
| H | 2.60784600  | -0.84225000 | -1.19501500 |
| O | 3.30047500  | -0.66793400 | 1.41792800  |
| C | 4.17092600  | -0.71145100 | 2.53949400  |
| H | 3.90397300  | -1.61534700 | 3.08841400  |
| H | 5.22133800  | -0.76989400 | 2.22806500  |
| H | 4.02847000  | 0.16378800  | 3.18479600  |
| C | -6.22462200 | 1.36047700  | -0.75731300 |
| N | -7.23144800 | 1.85930300  | -1.05596500 |
| O | 0.45682500  | 1.37598900  | 0.98506600  |
| C | 0.24282900  | 2.47778900  | 0.31628800  |
| O | -0.09607000 | 2.54413500  | -0.86838700 |
| C | 0.49410800  | 3.73069600  | 1.14068000  |
| H | 0.19544600  | 3.58764400  | 2.18240900  |
| H | 1.57117700  | 3.93663300  | 1.12445400  |
| H | -0.03255400 | 4.58129500  | 0.70324300  |

Pro<sup>PdI</sup>

0 1

|    |             |             |             |
|----|-------------|-------------|-------------|
| C  | 2.53734200  | 2.57103800  | 1.98747000  |
| C  | 1.33948800  | 1.91466900  | 1.60623900  |
| C  | 2.55486100  | 0.44368300  | 0.31514300  |
| C  | 3.74870900  | 1.12826500  | 0.70593600  |
| C  | 4.99517800  | 0.68940800  | 0.20326800  |
| H  | 5.89077200  | 1.21959000  | 0.50547400  |
| C  | 5.04307400  | -0.39686000 | -0.65341100 |
| C  | 3.84889300  | -1.07995900 | -1.02899100 |
| C  | 2.62498500  | -0.66922600 | -0.55768800 |
| H  | 3.91777300  | -1.93738000 | -1.68938800 |
| H  | 1.71518000  | -1.20945200 | -0.81191200 |
| H  | 0.37336200  | 2.24924000  | 1.97118700  |
| H  | 2.49470800  | 3.42042200  | 2.66553700  |
| N  | 1.34609200  | 0.87802600  | 0.78924400  |
| N  | 3.71996700  | 2.19834500  | 1.55016700  |
| Pd | -0.62703800 | 0.03565800  | 0.24536900  |
| O  | -2.36798200 | 1.21753500  | -2.36864100 |
| C  | -1.57597000 | 2.10151100  | -1.80358100 |
| O  | -0.89480900 | 1.88679400  | -0.79202400 |
| C  | -1.55878600 | 3.43494600  | -2.49291900 |
| H  | -2.54858700 | 3.89653800  | -2.41078800 |
| H  | -0.80902400 | 4.08195600  | -2.03809100 |

|   |             |             |             |
|---|-------------|-------------|-------------|
| H | -1.34823600 | 3.29781700  | -3.55780400 |
| C | -4.87597800 | -0.47988900 | 0.17056000  |
| C | -5.06278200 | -1.62961600 | -0.60453900 |
| C | -3.97263400 | -2.29602500 | -1.15298000 |
| C | -2.67727700 | -1.81449900 | -0.91609300 |
| C | -2.46091200 | -0.66199500 | -0.15057300 |
| C | -3.58255100 | 0.00097500  | 0.39541600  |
| H | -5.73888400 | 0.02386400  | 0.59102400  |
| H | -6.07203600 | -1.99457400 | -0.77419800 |
| H | -4.11696400 | -3.18966400 | -1.75326200 |
| H | -1.81709000 | -2.34513400 | -1.31146900 |
| H | -2.39614300 | 0.39168900  | -1.80789400 |
| O | -3.31453000 | 1.13724400  | 1.11906900  |
| C | -4.40325600 | 1.81987400  | 1.71507300  |
| H | -3.97000300 | 2.66670000  | 2.25012400  |
| H | -5.11125300 | 2.19001600  | 0.96104700  |
| H | -4.93986300 | 1.17752000  | 2.42513800  |
| C | 6.30306100  | -0.84616900 | -1.16852200 |
| N | 7.32096300  | -1.21492400 | -1.59244400 |
| O | -0.29171800 | -1.64376800 | 1.33375600  |
| C | 0.08381300  | -2.70766700 | 0.68106700  |
| O | 0.35028000  | -2.75566400 | -0.52593900 |
| C | 0.14644800  | -3.95148000 | 1.55482400  |
| H | 0.53228400  | -3.71288400 | 2.54952400  |
| H | -0.86955200 | -4.34466900 | 1.67849500  |
| H | 0.76397600  | -4.71499200 | 1.07753300  |

Int Pd2

0 1

|    |             |             |             |
|----|-------------|-------------|-------------|
| Pd | 1.45202400  | -0.36506100 | 0.92865900  |
| C  | 2.13775200  | -2.99270100 | 0.00747500  |
| O  | 1.34622400  | -1.97690600 | -0.27738900 |
| O  | 3.06978600  | -2.95757400 | 0.80236700  |
| C  | 1.77049300  | -4.24799300 | -0.76924900 |
| H  | 1.66557700  | -4.02191400 | -1.83531000 |
| H  | 2.53388800  | -5.01378200 | -0.62385200 |
| H  | 0.80578000  | -4.62839900 | -0.41367400 |
| Pd | -1.45195200 | 0.36018900  | 0.93071100  |
| C  | -2.13785600 | 2.99218900  | 0.02219500  |
| O  | -3.06952200 | 2.95347000  | 0.81734300  |
| O  | -1.34676200 | 1.97754500  | -0.26799500 |
| C  | -1.77043100 | 4.25121800  | -0.74836800 |
| H  | -1.66364700 | 4.03012000  | -1.81527600 |
| H  | -2.53458500 | 5.01580000  | -0.60059800 |

|   |             |             |             |
|---|-------------|-------------|-------------|
| H | -0.80658800 | 4.63073600  | -0.38947200 |
| C | 0.49604900  | 1.77492700  | 2.70128900  |
| O | 1.52180300  | 1.29812800  | 2.11906900  |
| O | -0.71492000 | 1.47849700  | 2.47980600  |
| C | 0.75561300  | 2.78399000  | 3.79688000  |
| H | -0.11009700 | 3.43507400  | 3.92838500  |
| H | 0.93266200  | 2.24130700  | 4.73268900  |
| H | 1.65136800  | 3.36623600  | 3.57049300  |
| C | -0.49526700 | -1.78798300 | 2.69322500  |
| O | 0.71565000  | -1.49046400 | 2.47290600  |
| O | -1.52115100 | -1.30851200 | 2.11343700  |
| C | -0.75462200 | -2.80223700 | 3.78404800  |
| H | -0.93171600 | -2.26400500 | 4.72241600  |
| H | -1.65032300 | -3.38350700 | 3.55496300  |
| H | 0.11116700  | -3.45384600 | 3.91244700  |
| C | 2.16595800  | 2.49797500  | -2.16834000 |
| C | 1.59553500  | 1.68333700  | -1.15715500 |
| C | 3.62045200  | 0.56378700  | -0.94718600 |
| C | 4.15752800  | 1.41228600  | -1.96639700 |
| C | 5.50569100  | 1.25231000  | -2.36113800 |
| H | 5.89614300  | 1.90470500  | -3.13327300 |
| C | 6.28675600  | 0.28043300  | -1.76093500 |
| C | 5.74121900  | -0.56229400 | -0.74963000 |
| C | 4.43435700  | -0.42477300 | -0.34611300 |
| H | 6.36975500  | -1.32289400 | -0.29997900 |
| H | 4.01329400  | -1.09124600 | 0.40178100  |
| H | 0.56290900  | 1.82061200  | -0.84475500 |
| H | 1.55201000  | 3.26250800  | -2.63807900 |
| N | 2.31123000  | 0.73864100  | -0.56714200 |
| N | 3.41056000  | 2.37793600  | -2.57104800 |
| C | 7.65371600  | 0.11222500  | -2.15768300 |
| N | 8.76297100  | -0.03106900 | -2.47455600 |
| C | -2.16683500 | -2.48800200 | -2.17967300 |
| C | -1.59628700 | -1.67857100 | -1.16438700 |
| C | -3.62079600 | -0.55924600 | -0.94932200 |
| C | -4.15799700 | -1.40249000 | -1.97282000 |
| C | -5.50601000 | -1.24002000 | -2.36705400 |
| H | -5.89655500 | -1.88842200 | -3.14249800 |
| C | -6.28682400 | -0.27082900 | -1.76220100 |
| C | -5.74118700 | 0.56662400  | -0.74657700 |
| C | -4.43446500 | 0.42659100  | -0.34347600 |
| H | -6.36953300 | 1.32519800  | -0.29325500 |
| H | -4.01332700 | 1.08914400  | 0.40784400  |
| H | -0.56375900 | -1.81774000 | -0.85250300 |

|   |             |             |             |
|---|-------------|-------------|-------------|
| H | -1.55312800 | -3.25052700 | -2.65297700 |
| N | -2.31170200 | -0.73645100 | -0.56992700 |
| N | -3.41129200 | -2.36544700 | -2.58207200 |
| C | -7.65363000 | -0.10010500 | -2.15840500 |
| N | -8.76275800 | 0.04518800  | -2.47481600 |

Pre\_TS<sup>Pd2</sup>

0 1

|    |             |             |             |
|----|-------------|-------------|-------------|
| Pd | -0.66778100 | 0.89125700  | 0.20845400  |
| C  | -1.45515600 | 2.44727300  | -2.01874300 |
| O  | -0.42746800 | 1.74550600  | -1.59628900 |
| O  | -2.52037700 | 2.57204600  | -1.42039500 |
| C  | -1.18810700 | 3.12352400  | -3.35583400 |
| H  | -0.78405400 | 2.40613000  | -4.07689100 |
| H  | -2.10912900 | 3.56458800  | -3.74051300 |
| H  | -0.43936400 | 3.91237300  | -3.22125000 |
| Pd | 1.81722400  | -0.69175200 | 0.27008000  |
| C  | -0.27318500 | -1.03245200 | 2.40985400  |
| O  | -0.93599500 | -0.01130600 | 2.03759500  |
| O  | 0.71450000  | -1.55539900 | 1.81905300  |
| C  | -0.69931000 | -1.67220200 | 3.71394000  |
| H  | -0.50540300 | -2.74634000 | 3.68683600  |
| H  | -0.09940600 | -1.24010300 | 4.52317900  |
| H  | -1.75302500 | -1.47195400 | 3.91651300  |
| C  | 1.74938100  | 1.92183900  | 1.60164900  |
| O  | 0.64496700  | 2.21850300  | 1.05876300  |
| O  | 2.37298500  | 0.81545100  | 1.52790200  |
| C  | 2.42370300  | 3.01496400  | 2.39932700  |
| H  | 3.13795100  | 2.58926300  | 3.10617000  |
| H  | 2.96620300  | 3.66247000  | 1.70134800  |
| H  | 1.67799100  | 3.62103600  | 2.91804200  |
| C  | -2.69847900 | -2.19761600 | -1.93950300 |
| C  | -1.73202200 | -1.30443200 | -1.41128500 |
| C  | -3.40608200 | -0.23756800 | -0.20735100 |
| C  | -4.34686400 | -1.16261900 | -0.75475200 |
| C  | -5.70891100 | -1.06538900 | -0.38540500 |
| H  | -6.40939000 | -1.77507100 | -0.80944300 |
| C  | -6.11116200 | -0.07912900 | 0.49680100  |
| C  | -5.16553900 | 0.84432000  | 1.03235600  |
| C  | -3.83967500 | 0.76932600  | 0.68583700  |
| H  | -5.51082800 | 1.61584500  | 1.71121900  |
| H  | -3.11697200 | 1.47996800  | 1.06515200  |
| H  | -0.67791000 | -1.41227800 | -1.63961800 |
| H  | -2.37926800 | -2.97510000 | -2.62912600 |

|   |             |             |             |
|---|-------------|-------------|-------------|
| N | -2.08643100 | -0.35137100 | -0.56597200 |
| N | -3.97319100 | -2.14114800 | -1.62634300 |
| C | -7.48828500 | 0.02372300  | 0.87989700  |
| N | -8.60251000 | 0.11251500  | 1.19965200  |
| O | 2.80398800  | -3.50025000 | -0.22850000 |
| C | 1.78056400  | -3.29850500 | -0.86617100 |
| O | 1.17542400  | -2.12734300 | -0.96796800 |
| C | 1.05207400  | -4.38926400 | -1.63689600 |
| H | 0.82647500  | -4.05833100 | -2.65594800 |
| H | 1.66120900  | -5.29410700 | -1.66528500 |
| H | 0.10058300  | -4.60949600 | -1.13922700 |
| C | 4.79329800  | 1.54719400  | -0.38802200 |
| C | 3.77851200  | 2.37236000  | -0.91441000 |
| C | 2.66997300  | 1.85002400  | -1.55411100 |
| C | 2.56417400  | 0.44975700  | -1.70578400 |
| C | 3.56997700  | -0.40158300 | -1.18681500 |
| C | 4.69376600  | 0.16960200  | -0.51815900 |
| H | 5.64282200  | 2.00005900  | 0.10837800  |
| H | 3.87861000  | 3.44917400  | -0.80614000 |
| H | 1.87144700  | 2.47998000  | -1.92244600 |
| H | 1.77211400  | 0.03629000  | -2.31941500 |
| H | 3.62855700  | -1.45329500 | -1.44263800 |
| O | 5.60441100  | -0.72589800 | -0.07949000 |
| C | 6.69910100  | -0.24640800 | 0.68961300  |
| H | 7.26691200  | -1.13032800 | 0.98027400  |
| H | 7.33770700  | 0.42295500  | 0.09916200  |
| H | 6.34677800  | 0.27814700  | 1.58615900  |

TS<sup>Pd2</sup>

0 1

|    |             |             |             |
|----|-------------|-------------|-------------|
| Pd | 0.73195300  | -0.65562300 | 0.53916900  |
| C  | 1.27060600  | -2.73518700 | -1.31932700 |
| O  | 0.71748100  | -1.54426700 | -1.26685400 |
| O  | 1.95851500  | -3.23874200 | -0.43437500 |
| C  | 0.95535900  | -3.46670000 | -2.61537600 |
| H  | 1.04565400  | -2.79514800 | -3.47401200 |
| H  | 1.61983900  | -4.32471200 | -2.73158200 |
| H  | -0.08167700 | -3.82132600 | -2.58088700 |
| Pd | -1.83261000 | 0.85986200  | 0.38492500  |
| C  | 0.10494200  | 1.31113800  | 2.64990000  |
| O  | 0.78136800  | 0.26631600  | 2.37394100  |
| O  | -0.77093400 | 1.85673600  | 1.92115400  |
| C  | 0.37512900  | 1.94469200  | 3.99797100  |
| H  | 0.31222200  | 3.03265800  | 3.91915700  |

|   |             |             |             |
|---|-------------|-------------|-------------|
| H | -0.40303900 | 1.61500200  | 4.69605100  |
| H | 1.34852600  | 1.64041500  | 4.38624700  |
| C | -1.74702100 | -1.76399000 | 1.70956000  |
| O | -0.60842500 | -2.03952700 | 1.22907900  |
| O | -2.34010600 | -0.63914300 | 1.68525900  |
| C | -2.50847400 | -2.90448500 | 2.34500100  |
| H | -3.11106900 | -2.53872000 | 3.17945900  |
| H | -3.18785500 | -3.31227600 | 1.58723900  |
| H | -1.82692900 | -3.69104200 | 2.67223100  |
| C | 2.73642700  | 2.89817500  | -0.76389100 |
| C | 1.77829900  | 1.91823900  | -0.40226800 |
| C | 3.48440500  | 0.36480200  | -0.15910000 |
| C | 4.42088600  | 1.38584500  | -0.51673900 |
| C | 5.79973600  | 1.07594300  | -0.55773800 |
| H | 6.49630200  | 1.86145400  | -0.82613000 |
| C | 6.22379800  | -0.20706900 | -0.25937000 |
| C | 5.28132900  | -1.22043100 | 0.08178700  |
| C | 3.93599600  | -0.94361000 | 0.13420700  |
| H | 5.63730100  | -2.22227400 | 0.29471000  |
| H | 3.21239300  | -1.72616400 | 0.35030000  |
| H | 0.72203500  | 2.15751700  | -0.35879500 |
| H | 2.39966600  | 3.90406200  | -1.00301100 |
| N | 2.14934600  | 0.68306600  | -0.10401500 |
| N | 4.02658400  | 2.65466300  | -0.81814100 |
| C | 7.62040800  | -0.52711600 | -0.29946800 |
| N | 8.75159600  | -0.79365200 | -0.32965700 |
| O | -2.50148400 | 1.74826500  | -2.61866100 |
| C | -1.73051300 | 2.56154800  | -2.02803900 |
| O | -1.33208300 | 2.44083000  | -0.82652900 |
| C | -1.20719000 | 3.74865600  | -2.80305900 |
| H | -0.18057600 | 3.53234900  | -3.12187100 |
| H | -1.81831900 | 3.93009900  | -3.68796000 |
| H | -1.18380700 | 4.63308000  | -2.16196300 |
| C | -5.20229200 | -1.34029400 | -0.78938700 |
| C | -4.61296700 | -2.50462200 | -1.28637300 |
| C | -3.25809200 | -2.54696600 | -1.63097900 |
| C | -2.48012100 | -1.40642000 | -1.46197200 |
| C | -3.03143000 | -0.20560400 | -0.95709500 |
| C | -4.41198600 | -0.19920100 | -0.61489600 |
| H | -6.25500900 | -1.34150200 | -0.53289400 |
| H | -5.23001700 | -3.39103200 | -1.41008300 |
| H | -2.82028600 | -3.46035900 | -2.02218000 |
| H | -1.42303100 | -1.42791700 | -1.70992800 |
| H | -2.75790300 | 0.80147200  | -1.79853700 |

|   |             |            |             |
|---|-------------|------------|-------------|
| O | -4.88290600 | 0.97423800 | -0.12838700 |
| C | -6.25464800 | 1.06549900 | 0.23287600  |
| H | -6.39861600 | 2.08545400 | 0.59008000  |
| H | -6.90656400 | 0.88249100 | -0.63018600 |
| H | -6.49865600 | 0.35819500 | 1.03452700  |

Pro<sup>Pd2</sup>

0 1

|    |             |             |             |
|----|-------------|-------------|-------------|
| Pd | -0.59134400 | -1.20136100 | 0.58428900  |
| C  | -0.99984800 | 0.95870500  | 2.54834400  |
| O  | -0.57655800 | 0.68659200  | 1.32222800  |
| O  | -1.59530100 | 0.15896100  | 3.25494100  |
| C  | -0.69041200 | 2.38403700  | 2.96698300  |
| H  | -1.20133900 | 3.08488400  | 2.29694000  |
| H  | -1.02297800 | 2.55053000  | 3.99255800  |
| H  | 0.38359000  | 2.57597400  | 2.87989100  |
| Pd | 1.93329100  | -0.50497700 | -0.63170400 |
| C  | 0.36019300  | -3.11264400 | -1.33543100 |
| O  | -0.44595400 | -3.01265000 | -0.33966500 |
| O  | 1.06309600  | -2.18335700 | -1.81037500 |
| C  | 0.45125200  | -4.48486800 | -1.96540300 |
| H  | 0.55086900  | -4.39091700 | -3.04957000 |
| H  | 1.35808400  | -4.97308900 | -1.58977800 |
| H  | -0.41279200 | -5.09944600 | -1.70720900 |
| C  | 1.93691700  | -2.18314900 | 1.76110500  |
| O  | 0.72373000  | -1.87536000 | 1.99662200  |
| O  | 2.61188100  | -1.89378300 | 0.72898100  |
| C  | 2.65518400  | -2.93226200 | 2.86002500  |
| H  | 3.47609500  | -3.51884900 | 2.44328600  |
| H  | 3.07710400  | -2.19608000 | 3.55438400  |
| H  | 1.96002000  | -3.56802600 | 3.41134000  |
| C  | -2.50886200 | 0.03613600  | -3.04050300 |
| C  | -1.64093100 | -0.52690600 | -2.07307000 |
| C  | -3.21010900 | -0.07752400 | -0.42422100 |
| C  | -4.05561200 | 0.48837800  | -1.43036700 |
| C  | -5.31909300 | 1.00602800  | -1.06224500 |
| H  | -5.94574300 | 1.43269300  | -1.83652200 |
| C  | -5.72401000 | 0.95395600  | 0.25975300  |
| C  | -4.87836300 | 0.38004700  | 1.25340100  |
| C  | -3.64619300 | -0.12915500 | 0.92038200  |
| H  | -5.21577500 | 0.35148000  | 2.28342700  |
| H  | -2.99562900 | -0.54234200 | 1.68465700  |
| H  | -0.66848700 | -0.92133200 | -2.34290400 |
| H  | -2.19557300 | 0.06350700  | -4.08128900 |

|   |             |             |             |
|---|-------------|-------------|-------------|
| N | -1.98009700 | -0.56631100 | -0.79264400 |
| N | -3.68313400 | 0.54499300  | -2.73932800 |
| C | -7.00267500 | 1.47880000  | 0.63895000  |
| N | -8.03799000 | 1.90371500  | 0.95343600  |
| O | 0.03523500  | 2.32927000  | -0.59912600 |
| C | 0.58670800  | 1.98354700  | -1.73298300 |
| O | 1.19972100  | 0.93074700  | -1.96880600 |
| C | 0.38796800  | 2.99693500  | -2.82678000 |
| H | -0.67519700 | 3.04685400  | -3.08749600 |
| H | 0.68331600  | 3.98730000  | -2.46820700 |
| H | 0.97311400  | 2.72030500  | -3.70350600 |
| C | 4.40275600  | 2.77123400  | 0.51242300  |
| C | 4.11465800  | 2.94540000  | 1.86918900  |
| C | 3.20575100  | 2.10673100  | 2.50614800  |
| C | 2.57147500  | 1.09310000  | 1.77456800  |
| C | 2.83232500  | 0.91269400  | 0.41786000  |
| C | 3.77077100  | 1.75246500  | -0.21122400 |
| H | 5.12469800  | 3.42304700  | 0.03339500  |
| H | 4.61412900  | 3.73673700  | 2.42119100  |
| H | 2.98782900  | 2.22838500  | 3.56377700  |
| H | 1.85571900  | 0.44816800  | 2.27081100  |
| H | 0.02952100  | 1.63699000  | 0.14193300  |
| O | 4.01342100  | 1.50674500  | -1.53915100 |
| C | 4.98372800  | 2.29600100  | -2.19963100 |
| H | 5.03196700  | 1.91712700  | -3.22190100 |
| H | 4.69971400  | 3.35759600  | -2.21829600 |
| H | 5.97109200  | 2.19988600  | -1.72887600 |

Int 4

0 1

|    |             |             |             |
|----|-------------|-------------|-------------|
| Pd | 0.03442800  | 0.12042100  | 0.80754100  |
| O  | -1.61238200 | 0.90885600  | 1.67919000  |
| C  | -2.79298500 | 0.97301500  | 1.16855300  |
| O  | -3.14460100 | 0.62661500  | 0.02171600  |
| Ag | -1.56185700 | -0.12232600 | -1.48054400 |
| O  | -1.26652700 | -2.30310900 | -0.69429300 |
| C  | -1.08548900 | -2.53671400 | 0.52669100  |
| O  | -0.55970100 | -1.74426500 | 1.39250900  |
| C  | -1.53549200 | -3.87549300 | 1.08238100  |
| H  | -1.02568600 | -4.10863600 | 2.01900100  |
| H  | -2.61362800 | -3.82285500 | 1.27424400  |
| H  | -1.36611700 | -4.66246200 | 0.34343000  |
| C  | -3.83661700 | 1.52404800  | 2.12767000  |
| H  | -4.75874300 | 1.75475500  | 1.59185800  |



|   |             |             |             |
|---|-------------|-------------|-------------|
| H | -4.04378400 | 0.77318400  | 2.89828800  |
| H | -3.45408100 | 2.41592300  | 2.63141500  |
| O | 0.59412900  | 1.97189200  | 0.13552000  |
| C | 0.41794400  | 2.27706700  | -1.10127200 |
| O | -0.12139900 | 1.57326300  | -1.98840600 |
| C | 0.90925900  | 3.66203800  | -1.48783700 |
| H | 1.65369200  | 4.03244200  | -0.78034800 |
| H | 1.31625600  | 3.64304800  | -2.50174700 |
| H | 0.05331600  | 4.34680900  | -1.48313100 |
| N | 1.80274800  | -0.61970700 | 0.04006400  |
| C | 1.81867500  | -1.44378200 | -1.02517700 |
| C | 2.96359300  | -0.15470900 | 0.54180600  |
| C | 2.99825600  | -1.81244500 | -1.65584100 |
| H | 0.84850400  | -1.80206500 | -1.34734800 |
| C | 4.19376500  | -0.47270600 | -0.04814200 |
| O | 2.80820300  | 0.60084500  | 1.63520000  |
| C | 4.20050300  | -1.30664400 | -1.16056000 |
| H | 2.96679200  | -2.47325800 | -2.51400500 |
| H | 5.11731300  | -0.08539400 | 0.36156000  |
| C | 3.94062600  | 1.27636100  | 2.17591300  |
| H | 5.14424800  | -1.56533200 | -1.63122700 |
| H | 3.55239600  | 1.87176200  | 3.00118100  |
| H | 4.68363400  | 0.56322000  | 2.55145100  |
| H | 4.39624700  | 1.93374300  | 1.42701600  |

Pre\_TS4°

0 1

|    |             |             |             |
|----|-------------|-------------|-------------|
| C  | -2.03132000 | 1.16208800  | 1.51434400  |
| C  | -2.30604500 | 2.52668500  | 1.50081300  |
| C  | -1.31429200 | 3.43640100  | 1.89643900  |
| C  | -0.06052400 | 3.01462100  | 2.32109300  |
| C  | 0.22789000  | 1.64092700  | 2.33740700  |
| H  | -3.28230400 | 2.88845100  | 1.20055400  |
| H  | 0.68824100  | 3.73239800  | 2.63805700  |
| H  | 1.16407300  | 1.28750500  | 2.75695800  |
| C  | -0.73352600 | 0.69747500  | 1.89594200  |
| H  | -0.64114800 | -0.37242800 | 2.07123600  |
| Pd | 0.66594300  | 0.77888000  | 0.04534100  |
| O  | -0.33633400 | 2.27476800  | -0.83367600 |
| C  | -1.34874200 | 2.05263800  | -1.61264400 |
| O  | -1.86353600 | 0.95281700  | -1.85426400 |
| Ag | -1.10775800 | -1.35848100 | -1.21856700 |
| O  | -2.70836900 | -2.38541400 | -0.18249100 |
| C  | -2.36883200 | -2.64331100 | 1.02393400  |

|   |             |             |             |
|---|-------------|-------------|-------------|
| O | -1.22769800 | -2.47730600 | 1.51401300  |
| C | -3.48731000 | -3.14251700 | 1.93143200  |
| H | -3.09213500 | -3.81291400 | 2.69894500  |
| H | -3.92508900 | -2.27247300 | 2.43658600  |
| H | -4.27294800 | -3.64039200 | 1.35799600  |
| C | -1.93022300 | 3.32759300  | -2.20339600 |
| H | -2.48415200 | 3.85834900  | -1.42030200 |
| H | -1.13337100 | 3.99039300  | -2.55119000 |
| H | -2.60995800 | 3.08532500  | -3.02217300 |
| H | -1.54507100 | 4.49800800  | 1.87902200  |
| O | -2.91080900 | 0.19496900  | 1.22464300  |
| C | -4.10214100 | 0.51491600  | 0.50634300  |
| H | -4.79548000 | 1.09009300  | 1.13264600  |
| H | -3.85130300 | 1.06252000  | -0.40629500 |
| H | -4.53294100 | -0.44969500 | 0.24227700  |
| O | 1.80287900  | 0.63905800  | -1.66726300 |
| C | 1.60036300  | -0.30314800 | -2.51865600 |
| O | 0.73955800  | -1.20437700 | -2.45419600 |
| C | 2.51492800  | -0.26452500 | -3.73204300 |
| H | 2.74261300  | -1.28255300 | -4.05636900 |
| H | 1.98297900  | 0.23833600  | -4.54779600 |
| H | 3.43280500  | 0.28855100  | -3.52346800 |
| N | 1.96379500  | -0.61333400 | 0.86465600  |
| C | 1.63562300  | -1.91090500 | 1.02691000  |
| C | 3.24764500  | -0.22146900 | 1.00111800  |
| C | 2.59809400  | -2.87384000 | 1.30636900  |
| H | 0.57690100  | -2.15737300 | 0.95063500  |
| C | 4.26839700  | -1.13718600 | 1.26818200  |
| C | 3.92980900  | -2.48022900 | 1.41464200  |
| H | 2.29305900  | -3.90629000 | 1.42863200  |
| H | 5.29390300  | -0.80652800 | 1.36850300  |
| H | 4.70797800  | -3.20877500 | 1.62239900  |
| O | 3.41672900  | 1.10556100  | 0.87681300  |
| C | 4.74007700  | 1.61972800  | 0.74799600  |
| H | 5.30920400  | 1.48600100  | 1.67542900  |
| H | 5.26249100  | 1.13828000  | -0.08559900 |
| H | 4.61772200  | 2.68241100  | 0.54169800  |

TS4°

0 1

|   |             |            |             |
|---|-------------|------------|-------------|
| C | -1.95860100 | 1.97661900 | -0.02601600 |
| C | -2.58925400 | 3.16524700 | -0.40544800 |
| C | -1.81103000 | 4.24594200 | -0.82270900 |
| C | -0.41653100 | 4.16719000 | -0.84012300 |

|    |             |             |             |
|----|-------------|-------------|-------------|
| C  | 0.19481400  | 2.97764700  | -0.45573700 |
| H  | -3.66833900 | 3.26126200  | -0.37836300 |
| H  | 0.17707800  | 5.02212200  | -1.15038400 |
| H  | 1.27771900  | 2.91420800  | -0.46473800 |
| C  | -0.54243200 | 1.83982200  | -0.05542600 |
| H  | -0.16661000 | 1.35606900  | 1.16111800  |
| Pd | 0.27402500  | 0.04579100  | -0.84875900 |
| O  | -1.39510700 | -0.15069500 | -2.00176400 |
| C  | -2.27278800 | -1.07361000 | -1.85548800 |
| O  | -2.39927900 | -1.86100500 | -0.88902400 |
| Ag | -1.22232800 | -1.53814700 | 0.99068100  |
| O  | -0.74437800 | -0.67223800 | 2.96962600  |
| C  | -0.24572200 | 0.44556800  | 3.24312000  |
| O  | 0.13746800  | 1.34857700  | 2.41613000  |
| C  | -0.01496200 | 0.79173700  | 4.70498100  |
| H  | 1.05904700  | 0.91892900  | 4.88027300  |
| H  | -0.49593700 | 1.74660200  | 4.93855600  |
| H  | -0.40350600 | 0.00538000  | 5.35387400  |
| C  | -3.24169400 | -1.19424900 | -3.02060200 |
| H  | -3.53059400 | -0.20340700 | -3.38170100 |
| H  | -2.73764400 | -1.71132000 | -3.84493700 |
| H  | -4.12286600 | -1.76824800 | -2.72807200 |
| H  | -2.30632500 | 5.16566500  | -1.12343800 |
| O  | -2.63562900 | 0.90109700  | 0.44336100  |
| C  | -4.05441300 | 0.88792800  | 0.39803800  |
| H  | -4.48243000 | 1.65388200  | 1.05632000  |
| H  | -4.41396800 | 1.04023400  | -0.62669500 |
| H  | -4.34714800 | -0.10353600 | 0.74343400  |
| O  | 1.00879000  | -1.68680100 | -1.73654800 |
| C  | 1.06621900  | -2.74673600 | -1.00447400 |
| O  | 0.71474400  | -2.83955700 | 0.19006900  |
| C  | 1.59161700  | -3.98163700 | -1.72179500 |
| H  | 2.10568200  | -4.63645300 | -1.01426000 |
| H  | 0.73595100  | -4.53151600 | -2.13150600 |
| H  | 2.25303600  | -3.71187300 | -2.54824600 |
| N  | 2.09712900  | 0.19323100  | 0.12033200  |
| C  | 2.31087500  | -0.42969200 | 1.29410600  |
| C  | 3.12902700  | 0.78117200  | -0.51388100 |
| C  | 3.56132500  | -0.46804000 | 1.89448800  |
| H  | 1.45269100  | -0.91711300 | 1.73100300  |
| C  | 4.41872700  | 0.79085300  | 0.02894100  |
| C  | 4.62696000  | 0.15702800  | 1.24965100  |
| H  | 3.68694600  | -0.98370300 | 2.83911700  |
| H  | 5.23399300  | 1.27526200  | -0.49191200 |

|   |            |            |             |
|---|------------|------------|-------------|
| H | 5.62058100 | 0.14951600 | 1.68768400  |
| O | 2.78603700 | 1.34159400 | -1.68551400 |
| C | 3.80260300 | 1.93216000 | -2.49043700 |
| H | 4.26663400 | 2.78384000 | -1.97908200 |
| H | 4.56778500 | 1.19481600 | -2.75740500 |
| H | 3.29298800 | 2.27578900 | -3.38986800 |

Pro 4°

0 1

|    |             |             |             |
|----|-------------|-------------|-------------|
| C  | -0.79587900 | 2.06606600  | 1.54474700  |
| C  | -0.90723800 | 3.09432600  | 2.48512800  |
| C  | -0.01156600 | 4.16148300  | 2.45993700  |
| C  | 0.99970100  | 4.18802400  | 1.49878200  |
| C  | 1.11257600  | 3.14287900  | 0.57869300  |
| H  | -1.69061300 | 3.05194100  | 3.23655600  |
| H  | 1.70269500  | 5.01648300  | 1.46683400  |
| H  | 1.90770600  | 3.16503100  | -0.16138500 |
| C  | 0.21888600  | 2.06150000  | 0.58092600  |
| H  | -1.44719500 | -0.44617700 | 2.41983700  |
| Pd | 0.49213400  | 0.58387500  | -0.71542300 |
| O  | -0.76902800 | 1.55337000  | -2.03019900 |
| C  | -2.02392400 | 1.42530500  | -2.20678800 |
| O  | -2.78390100 | 0.56673800  | -1.68148300 |
| Ag | -1.81392800 | -1.12679600 | -0.67672300 |
| O  | -2.87351600 | -2.01939200 | 1.43918200  |
| C  | -1.91609700 | -2.28736800 | 2.15609900  |
| O  | -1.18027400 | -1.34944400 | 2.76360900  |
| C  | -1.40220500 | -3.68171600 | 2.37964300  |
| H  | -0.70571000 | -3.89217800 | 1.55780900  |
| H  | -0.87282000 | -3.77025300 | 3.33071200  |
| H  | -2.22601100 | -4.39520500 | 2.32346600  |
| C  | -2.65043900 | 2.45843000  | -3.12737800 |
| H  | -2.79428000 | 3.38849900  | -2.56478300 |
| H  | -1.98158300 | 2.67723500  | -3.96325300 |
| H  | -3.61928700 | 2.11242100  | -3.49174400 |
| H  | -0.10181000 | 4.96059400  | 3.19017200  |
| O  | -1.70483900 | 0.99924900  | 1.60238000  |
| C  | -3.08971200 | 1.34787200  | 1.42979400  |
| H  | -3.42713700 | 2.01927500  | 2.22625700  |
| H  | -3.23257200 | 1.80928500  | 0.45083300  |
| H  | -3.63833600 | 0.40672200  | 1.47323100  |
| O  | 0.97765500  | -1.16198200 | -1.97356300 |
| C  | 0.76162500  | -2.32038200 | -1.50390300 |
| O  | -0.17438300 | -2.64188000 | -0.70698200 |

|   |            |             |             |
|---|------------|-------------|-------------|
| C | 1.75012900 | -3.40934800 | -1.88952600 |
| H | 2.61565100 | -3.34135100 | -1.21778500 |
| H | 1.30524400 | -4.40076200 | -1.78230400 |
| H | 2.10719200 | -3.25771000 | -2.91101200 |
| N | 1.99686300 | -0.19786300 | 0.47674000  |
| C | 1.75698700 | -1.02260900 | 1.51061800  |
| C | 3.26510700 | 0.00077100  | 0.06847700  |
| C | 2.77304100 | -1.70194400 | 2.17008200  |
| H | 0.72188500 | -1.13590000 | 1.79833100  |
| C | 4.34428800 | -0.64951000 | 0.67879000  |
| C | 4.08510300 | -1.51227400 | 1.73910200  |
| H | 2.53052200 | -2.36061600 | 2.99566200  |
| H | 5.35640700 | -0.48158000 | 0.33500700  |
| H | 4.90810200 | -2.02757900 | 2.22528100  |
| O | 3.36905000 | 0.86380800  | -0.95297900 |
| C | 4.64253100 | 1.06076000  | -1.56135300 |
| H | 5.35184800 | 1.51102600  | -0.85696800 |
| H | 5.04251000 | 0.11500300  | -1.94344700 |
| H | 4.46242200 | 1.74463500  | -2.38995200 |

L3

01

|   |             |             |             |
|---|-------------|-------------|-------------|
| C | 1.16631900  | 1.34704400  | -0.00000200 |
| C | 2.20750300  | 0.42806800  | -0.00000200 |
| C | 1.87846000  | -0.93482100 | -0.00001600 |
| C | 0.54597100  | -1.31311800 | 0.00000400  |
| C | -0.42322500 | -0.29294600 | 0.00002900  |
| N | -0.13261400 | 1.00387500  | 0.00000500  |
| H | 2.65826000  | -1.69136100 | -0.00002900 |
| H | 1.37035000  | 2.41624400  | 0.00000200  |
| H | 3.23957700  | 0.76216700  | 0.00001100  |
| H | 0.23344600  | -2.35120700 | 0.00001500  |
| O | -1.71691500 | -0.68388000 | 0.00000200  |
| C | -2.70166000 | 0.35057200  | -0.00001200 |
| H | -3.66218400 | -0.16715500 | -0.00000300 |
| H | -2.60801500 | 0.98323500  | 0.88786600  |
| H | -2.60802000 | 0.98320500  | -0.88791300 |

TS1P\_NHAc

01

|   |             |             |            |
|---|-------------|-------------|------------|
| C | -3.77943500 | -0.41877600 | 0.09236400 |
| C | -4.96633700 | 0.28266500  | 0.06586200 |
| C | -4.97202200 | 1.68313500  | 0.24547000 |
| C | -3.76048000 | 2.36150800  | 0.48412600 |

|    |             |             |             |
|----|-------------|-------------|-------------|
| C  | -2.58269600 | 1.63297000  | 0.52435900  |
| H  | -5.90654600 | -0.23895600 | -0.10093700 |
| H  | -3.77087800 | 3.43087400  | 0.63441000  |
| H  | -1.66187500 | 2.17006400  | 0.73291300  |
| C  | -2.53371200 | 0.22426600  | 0.34036100  |
| H  | -2.03341400 | -0.33076300 | 1.44814500  |
| Pd | -0.90053300 | -0.44425800 | -0.75751200 |
| O  | -2.15337700 | -1.30601500 | -2.11000700 |
| C  | -2.18371300 | -2.57502300 | -2.29809900 |
| O  | -1.78958900 | -3.46118300 | -1.50024100 |
| Ag | -0.99644600 | -3.04850000 | 0.47937200  |
| O  | -0.97298700 | -2.64898300 | 2.61248800  |
| C  | -1.45063900 | -1.66765000 | 3.24341100  |
| O  | -1.83486200 | -0.55632200 | 2.74262800  |
| C  | -1.58275700 | -1.79307400 | 4.74923000  |
| H  | -1.39781700 | -0.83078700 | 5.23240600  |
| H  | -2.61080000 | -2.09287500 | 4.98473900  |
| H  | -0.90308100 | -2.55744700 | 5.13020700  |
| C  | -2.74216700 | -3.01251400 | -3.63501900 |
| H  | -3.17558300 | -4.01147800 | -3.55827100 |
| H  | -3.47781100 | -2.29511600 | -4.00477300 |
| H  | -1.91090000 | -3.04883500 | -4.34882000 |
| N  | 0.47753900  | 0.52948300  | 0.43120300  |
| C  | 1.05823100  | 1.70151600  | 0.01020000  |
| C  | 0.92017800  | -0.02361900 | 1.54834200  |
| C  | 0.67590700  | 2.31008800  | -1.20805200 |
| C  | 2.08548700  | 2.29093500  | 0.80816700  |
| C  | 1.92781200  | 0.60082200  | 2.32583100  |
| H  | 0.50384400  | -0.97664600 | 1.83741900  |
| C  | 1.31045800  | 3.45375000  | -1.62829900 |
| H  | -0.09998300 | 1.84360700  | -1.80636700 |
| C  | 2.72047000  | 3.47169500  | 0.36029000  |
| N  | 2.49649400  | 1.73235800  | 1.97962300  |
| H  | 2.26517000  | 0.12396600  | 3.24159600  |
| C  | 2.34425900  | 4.04087600  | -0.84283300 |
| H  | 1.03839600  | 3.91686400  | -2.56997400 |
| H  | 3.51214700  | 3.88926600  | 0.97108000  |
| C  | 2.99974400  | 5.22441100  | -1.31375000 |
| N  | 3.52503600  | 6.18678000  | -1.69971300 |
| N  | 4.16989800  | 1.23616600  | -2.00306200 |
| C  | 3.27329100  | 0.25839300  | -2.16438200 |
| C  | 4.88782700  | 1.23817600  | -0.87423800 |
| C  | 3.06385500  | -0.74607500 | -1.21330600 |
| H  | 2.67606400  | 0.28196600  | -3.07106900 |

|   |             |             |             |
|---|-------------|-------------|-------------|
| C | 4.74939600  | 0.27345900  | 0.12655200  |
| H | 5.59099600  | 2.05761600  | -0.75121000 |
| C | 3.82262300  | -0.75286300 | -0.05019700 |
| S | 1.78612500  | -1.98296300 | -1.48294000 |
| C | 5.57396000  | 0.36416600  | 1.37930100  |
| H | 3.66067900  | -1.51297200 | 0.70487100  |
| O | 2.27819600  | -2.93737400 | -2.47567000 |
| O | 1.46906900  | -2.50740700 | -0.12376000 |
| O | 0.63970700  | -1.13113600 | -2.04470500 |
| F | 6.79542700  | -0.18537700 | 1.21969300  |
| F | 4.97937500  | -0.27866600 | 2.41106600  |
| F | 5.76035800  | 1.64936600  | 1.74926600  |
| N | -6.20707200 | 2.32482400  | 0.18811200  |
| H | -6.99771800 | 1.71726800  | 0.01541400  |
| C | -6.49829000 | 3.67992100  | 0.31593500  |
| C | -7.97755200 | 3.99113200  | 0.16575800  |
| H | -8.58519800 | 3.39191500  | 0.85369600  |
| H | -8.13177900 | 5.04939200  | 0.37666000  |
| H | -8.31464300 | 3.77842600  | -0.85589300 |
| O | -5.65408300 | 4.53349800  | 0.51912200  |
| H | -3.79828300 | -1.49411700 | -0.05065000 |

TS1<sup>P</sup>\_Me

0 1

|    |             |             |             |
|----|-------------|-------------|-------------|
| C  | -3.97389600 | 1.24394100  | 0.26083800  |
| C  | -4.84582600 | 2.31967600  | 0.29801900  |
| C  | -4.37239800 | 3.61941300  | 0.54829300  |
| C  | -3.00053800 | 3.80516000  | 0.78093800  |
| C  | -2.12883300 | 2.72500900  | 0.76028000  |
| H  | -5.90804100 | 2.16466500  | 0.12580600  |
| H  | -2.62471500 | 4.80543100  | 0.98102100  |
| H  | -1.07656500 | 2.89516400  | 0.96923100  |
| C  | -2.58309000 | 1.40567000  | 0.50118700  |
| H  | -2.26338300 | 0.61846300  | 1.51614500  |
| Pd | -1.28566400 | 0.28214800  | -0.69108100 |
| O  | -2.77400600 | 0.00512000  | -2.04762700 |
| C  | -3.23639900 | -1.16043500 | -2.32209400 |
| O  | -3.15135500 | -2.18834800 | -1.60585900 |
| Ag | -2.26129200 | -2.22073100 | 0.37181600  |
| O  | -2.06856000 | -2.00945600 | 2.51884400  |
| C  | -2.16253100 | -0.96575300 | 3.22138300  |
| O  | -2.12543300 | 0.23900600  | 2.79940500  |
| C  | -2.32622500 | -1.13894000 | 4.71937700  |
| H  | -1.83467800 | -0.32499400 | 5.25716000  |

|   |             |             |             |
|---|-------------|-------------|-------------|
| H | -3.39569400 | -1.10132500 | 4.95841000  |
| H | -1.93607700 | -2.10777000 | 5.03681100  |
| C | -3.93366900 | -1.27410900 | -3.66019400 |
| H | -4.67542600 | -2.07456300 | -3.63565500 |
| H | -4.39340300 | -0.32466500 | -3.94247900 |
| H | -3.17634800 | -1.52488000 | -4.41213300 |
| N | 0.36237600  | 0.62875500  | 0.50179900  |
| C | 1.30407400  | 1.56124900  | 0.13917900  |
| C | 0.60440600  | -0.13017100 | 1.55766900  |
| C | 1.13801400  | 2.35580300  | -1.01920300 |
| C | 2.48197400  | 1.70021200  | 0.93435200  |
| C | 1.77577800  | 0.05030400  | 2.33592900  |
| H | -0.10917800 | -0.90450800 | 1.79492500  |
| C | 2.12119300  | 3.24296200  | -1.38480100 |
| H | 0.24238100  | 2.22859200  | -1.61852100 |
| C | 3.47767600  | 2.62447600  | 0.54403600  |
| N | 2.69221400  | 0.94486200  | 2.04724500  |
| H | 1.94195100  | -0.58385600 | 3.20197600  |
| C | 3.30363500  | 3.37981800  | -0.60151400 |
| H | 2.01322500  | 3.84121100  | -2.28243200 |
| H | 4.37304400  | 2.69695500  | 1.15004400  |
| C | 4.31825800  | 4.30273000  | -1.01492000 |
| N | 5.13495600  | 5.05741100  | -1.35332700 |
| N | 4.03145600  | 0.22740800  | -2.04026100 |
| C | 2.85179700  | -0.37217400 | -2.22695900 |
| C | 4.72599300  | -0.09972900 | -0.94473800 |
| C | 2.32768100  | -1.31364300 | -1.33464900 |
| H | 2.28333700  | -0.07898400 | -3.10459000 |
| C | 4.28326800  | -1.03243300 | -0.00365400 |
| H | 5.66909800  | 0.42011700  | -0.79838600 |
| C | 3.05830700  | -1.66598300 | -0.20737500 |
| S | 0.69796900  | -2.01555200 | -1.62849700 |
| C | 5.11064500  | -1.31943700 | 1.21739800  |
| H | 2.65936900  | -2.38077700 | 0.50258500  |
| O | 0.81109000  | -2.99526600 | -2.70784700 |
| O | 0.24518500  | -2.50576800 | -0.29622200 |
| O | -0.09655900 | -0.77967600 | -2.07884100 |
| F | 6.07609700  | -2.22804100 | 0.97012700  |
| F | 4.35216600  | -1.80712300 | 2.22619600  |
| F | 5.72098400  | -0.20143100 | 1.66643300  |
| H | -4.36057700 | 0.24871700  | 0.06640000  |
| C | -5.32674500 | 4.78222400  | 0.60334400  |
| H | -4.81722100 | 5.73032700  | 0.40697300  |
| H | -6.13906400 | 4.66644200  | -0.12140800 |



|        |             |             |             |
|--------|-------------|-------------|-------------|
| H      | -5.78673100 | 4.85500700  | 1.59792700  |
| TS1P_H |             |             |             |
| 0 1    |             |             |             |
| C      | -3.91862700 | 1.77428600  | 0.42950200  |
| C      | -4.66271100 | 2.94217400  | 0.53308700  |
| C      | -4.02325300 | 4.14589900  | 0.85040200  |
| C      | -2.64589500 | 4.17758700  | 1.09026700  |
| C      | -1.90756300 | 3.00237500  | 1.00165800  |
| H      | -5.73546400 | 2.92459500  | 0.36418100  |
| H      | -2.15922300 | 5.11365000  | 1.34857600  |
| H      | -0.84351200 | 3.02824500  | 1.21754200  |
| C      | -2.51962500 | 1.76790900  | 0.66542400  |
| H      | -2.26453900 | 0.86432400  | 1.59173200  |
| Pd     | -1.35773800 | 0.57616700  | -0.61354600 |
| O      | -2.87837700 | 0.55143800  | -1.96088900 |
| C      | -3.45475400 | -0.53976500 | -2.31577700 |
| O      | -3.46890600 | -1.62107400 | -1.67780200 |
| Ag     | -2.59157200 | -1.88016900 | 0.28601700  |
| O      | -2.35793100 | -1.83560700 | 2.43528200  |
| C      | -2.32602400 | -0.83285900 | 3.20111600  |
| O      | -2.15319200 | 0.38276600  | 2.85183600  |
| C      | -2.49797100 | -1.07906700 | 4.68783100  |
| H      | -1.91350800 | -0.36082800 | 5.26732000  |
| H      | -3.55459600 | -0.93556100 | 4.94328400  |
| H      | -2.21851200 | -2.10364800 | 4.94031200  |
| C      | -4.16373700 | -0.48396200 | -3.65104700 |
| H      | -4.98039300 | -1.20769200 | -3.67838200 |
| H      | -4.52872800 | 0.52437500  | -3.85716200 |
| H      | -3.43669300 | -0.75033800 | -4.42713400 |
| H      | -4.60350700 | 5.06189800  | 0.92131600  |
| N      | 0.33308600  | 0.66111200  | 0.56591400  |
| C      | 1.36493600  | 1.51097300  | 0.24833400  |
| C      | 0.50603700  | -0.19361900 | 1.56041600  |
| C      | 1.26962200  | 2.40071200  | -0.84712100 |
| C      | 2.56248800  | 1.46452400  | 1.02497900  |
| C      | 1.70139600  | -0.19682300 | 2.32297500  |
| H      | -0.28394900 | -0.90188800 | 1.75878300  |
| C      | 2.33825100  | 3.20112300  | -1.17093100 |
| H      | 0.35710300  | 2.41553000  | -1.43405900 |
| C      | 3.64701500  | 2.30239600  | 0.67888900  |
| N      | 2.70551100  | 0.61219300  | 2.07673200  |
| H      | 1.81034900  | -0.90610800 | 3.13833700  |
| C      | 3.53976800  | 3.15299700  | -0.40646400 |

|   |             |             |             |
|---|-------------|-------------|-------------|
| H | 2.28286000  | 3.87125800  | -2.02131500 |
| H | 4.55332700  | 2.23484700  | 1.26900600  |
| C | 4.64275700  | 3.98900300  | -0.77606700 |
| N | 5.53203500  | 4.67373500  | -1.07829600 |
| N | 3.90975000  | 0.04922900  | -2.06507900 |
| C | 2.66893600  | -0.40253200 | -2.27006200 |
| C | 4.57859300  | -0.43274400 | -1.01143700 |
| C | 2.05606500  | -1.34505300 | -1.43734000 |
| H | 2.12508900  | 0.01526400  | -3.11211000 |
| C | 4.04808700  | -1.37914300 | -0.13149600 |
| H | 5.57524800  | -0.03144300 | -0.84807200 |
| C | 2.75794900  | -1.85781800 | -0.35428900 |
| S | 0.35623100  | -1.84395600 | -1.74590200 |
| C | 4.85438200  | -1.84764100 | 1.04680200  |
| H | 2.29181400  | -2.57513800 | 0.31073400  |
| O | 0.34607200  | -2.74510600 | -2.89688700 |
| O | -0.13020700 | -2.37869100 | -0.44362900 |
| O | -0.30598000 | -0.49868200 | -2.08959000 |
| F | 5.70279200  | -2.84149800 | 0.71368800  |
| F | 4.05851600  | -2.31656300 | 2.03558600  |
| F | 5.59755800  | -0.84348800 | 1.55934600  |
| H | -4.41405800 | 0.84032800  | 0.18490600  |

TS1P\_Cl

0 1

|    |             |             |             |
|----|-------------|-------------|-------------|
| C  | -3.97767000 | 0.73708400  | 0.22067300  |
| C  | -4.95986900 | 1.71567800  | 0.20531100  |
| C  | -4.58855300 | 3.04514500  | 0.43414600  |
| C  | -3.26389900 | 3.40298200  | 0.70144400  |
| C  | -2.29867500 | 2.40456300  | 0.72796000  |
| H  | -5.99873300 | 1.46873300  | 0.01628400  |
| H  | -3.00932300 | 4.44055300  | 0.88755000  |
| H  | -1.27483600 | 2.67976200  | 0.96288100  |
| C  | -2.61774600 | 1.04398700  | 0.48612600  |
| H  | -2.20481700 | 0.28883400  | 1.48555700  |
| Pd | -1.18988300 | 0.04735500  | -0.68770800 |
| O  | -2.63162700 | -0.39785000 | -2.04756100 |
| C  | -2.94983000 | -1.61058300 | -2.32817900 |
| O  | -2.75156800 | -2.62084400 | -1.61000300 |
| Ag | -1.89866400 | -2.54558300 | 0.38090600  |
| O  | -1.74405400 | -2.29594100 | 2.52336300  |
| C  | -1.94850700 | -1.25979100 | 3.21385100  |
| O  | -2.03233500 | -0.06250700 | 2.77713300  |
| C  | -2.10200500 | -1.43183800 | 4.71263200  |

|    |             |             |             |
|----|-------------|-------------|-------------|
| H  | -1.62566000 | -2.35712200 | 5.04186900  |
| H  | -1.68998600 | -0.57032100 | 5.24309800  |
| H  | -3.17144300 | -1.48951200 | 4.94765800  |
| C  | -3.61284400 | -1.80271700 | -3.67402200 |
| H  | -4.25042200 | -2.68853000 | -3.66066100 |
| H  | -4.18269400 | -0.91570700 | -3.95853900 |
| H  | -2.82176300 | -1.95424800 | -4.41773100 |
| N  | 0.40881400  | 0.58052800  | 0.50306700  |
| C  | 1.24428300  | 1.60651700  | 0.13244900  |
| C  | 0.73074000  | -0.14091400 | 1.56400900  |
| C  | 0.99422500  | 2.37052700  | -1.03133500 |
| C  | 2.40047100  | 1.87682800  | 0.92616600  |
| C  | 1.87616500  | 0.16973400  | 2.33975100  |
| H  | 0.10459600  | -0.98577700 | 1.80755300  |
| C  | 1.87646300  | 3.35589700  | -1.40324500 |
| H  | 0.11865500  | 2.14390300  | -1.63083000 |
| C  | 3.29077200  | 2.90051400  | 0.52931400  |
| N  | 2.69089400  | 1.15555400  | 2.04340800  |
| H  | 2.11017600  | -0.43700700 | 3.20971200  |
| C  | 3.03694300  | 3.62479000  | -0.62134700 |
| H  | 1.70499600  | 3.93277700  | -2.30497100 |
| H  | 4.17248100  | 3.07390100  | 1.13489200  |
| C  | 3.94681500  | 4.64826800  | -1.04169300 |
| N  | 4.67857600  | 5.48316600  | -1.38581100 |
| N  | 4.10746800  | 0.55954300  | -2.03043800 |
| C  | 2.99798000  | -0.16181900 | -2.21528300 |
| C  | 4.83235300  | 0.31191600  | -0.93358100 |
| C  | 2.57589100  | -1.14950100 | -1.31877300 |
| H  | 2.40266700  | 0.06609100  | -3.09449000 |
| C  | 4.49015300  | -0.65856200 | 0.01116700  |
| H  | 5.71528400  | 0.92893000  | -0.78953700 |
| C  | 3.33880100  | -1.41829900 | -0.18988900 |
| S  | 1.02990400  | -2.02073200 | -1.60776200 |
| C  | 5.34240500  | -0.85438300 | 1.23335300  |
| H  | 3.01705900  | -2.16784100 | 0.52339600  |
| O  | 1.24080400  | -2.98416600 | -2.68642400 |
| O  | 0.63007400  | -2.54978700 | -0.27402700 |
| O  | 0.10763700  | -0.87498600 | -2.06217800 |
| F  | 6.39059700  | -1.66725400 | 0.99170700  |
| F  | 4.63431100  | -1.40567400 | 2.24622700  |
| F  | 5.84106000  | 0.32077000  | 1.67317000  |
| H  | -4.26026400 | -0.29566800 | 0.04514300  |
| Cl | -5.81395500 | 4.28731700  | 0.40278700  |

TS1P\_CN

0 1

|    |             |             |             |
|----|-------------|-------------|-------------|
| C  | -4.01436000 | 0.92456900  | 0.26403700  |
| C  | -4.94676500 | 1.94958500  | 0.23648100  |
| C  | -4.52683200 | 3.27235300  | 0.46964400  |
| C  | -3.17968600 | 3.55436000  | 0.75533500  |
| C  | -2.26226700 | 2.51298400  | 0.79466100  |
| H  | -5.99328300 | 1.74841500  | 0.03378200  |
| H  | -2.87471000 | 4.57786700  | 0.94577700  |
| H  | -1.22941200 | 2.73403500  | 1.04459900  |
| C  | -2.64763500 | 1.17499400  | 0.53895800  |
| H  | -2.22403500 | 0.35835600  | 1.46992200  |
| Pd | -1.24513100 | 0.12506100  | -0.64752800 |
| O  | -2.70838300 | -0.24679400 | -2.00386900 |
| C  | -3.05176400 | -1.44485600 | -2.32061700 |
| O  | -2.87042900 | -2.47893800 | -1.63357300 |
| Ag | -2.02876600 | -2.47821400 | 0.36102200  |
| O  | -1.85420800 | -2.26391700 | 2.50114100  |
| C  | -2.02430100 | -1.22626700 | 3.20007800  |
| O  | -2.06218700 | -0.02394600 | 2.77280600  |
| C  | -2.19018200 | -1.40672900 | 4.69643000  |
| H  | -1.73808500 | -2.34601700 | 5.02026900  |
| H  | -1.76110800 | -0.55986700 | 5.23666900  |
| H  | -3.26209300 | -1.44177200 | 4.92459800  |
| C  | -3.72280100 | -1.58136600 | -3.66863500 |
| H  | -4.37649600 | -2.45529600 | -3.68060200 |
| H  | -4.27707300 | -0.67541400 | -3.92250400 |
| H  | -2.93704500 | -1.72339400 | -4.41985200 |
| N  | 0.38305800  | 0.58342300  | 0.53392400  |
| C  | 1.24535300  | 1.59109600  | 0.17496200  |
| C  | 0.69247400  | -0.17094200 | 1.57550600  |
| C  | 1.00844100  | 2.38652200  | -0.97028700 |
| C  | 2.41699100  | 1.80869800  | 0.96256200  |
| C  | 1.85419100  | 0.08832000  | 2.34581500  |
| H  | 0.04295000  | -1.00160300 | 1.80686100  |
| C  | 1.91788200  | 3.35136200  | -1.33058000 |
| H  | 0.12150700  | 2.20038200  | -1.56684600 |
| C  | 3.33542800  | 2.81196600  | 0.57776800  |
| N  | 2.69523700  | 1.05531100  | 2.06126100  |
| H  | 2.07819000  | -0.54342000 | 3.20043800  |
| C  | 3.09375800  | 3.56745900  | -0.55526600 |
| H  | 1.75626900  | 3.95180500  | -2.21863700 |
| H  | 4.22804300  | 2.94450300  | 1.17764700  |
| C  | 4.03226400  | 4.56918800  | -0.96480400 |

|   |             |             |             |
|---|-------------|-------------|-------------|
| N | 4.78810600  | 5.38590600  | -1.30024100 |
| N | 4.05225800  | 0.50628000  | -2.05097900 |
| C | 2.91870800  | -0.17591600 | -2.23739700 |
| C | 4.78007000  | 0.21539400  | -0.96676200 |
| C | 2.47499600  | -1.16604400 | -1.35415700 |
| H | 2.32254400  | 0.08691100  | -3.10626100 |
| C | 4.41722400  | -0.76158300 | -0.03640200 |
| H | 5.68351600  | 0.80152800  | -0.82098400 |
| C | 3.24041700  | -1.48071900 | -0.23884800 |
| S | 0.89868500  | -1.98043500 | -1.64045900 |
| C | 5.27532200  | -1.00532000 | 1.17338000  |
| H | 2.90285700  | -2.23360500 | 0.46348400  |
| O | 1.05730300  | -2.91603600 | -2.75133900 |
| O | 0.49941200  | -2.53088600 | -0.31634000 |
| O | 0.00504600  | -0.79121400 | -2.05060300 |
| F | 6.30154200  | -1.83649500 | 0.90368200  |
| F | 4.56273100  | -1.56213400 | 2.17994800  |
| F | 5.80481500  | 0.14807100  | 1.63416800  |
| H | -4.33856900 | -0.09491100 | 0.08529700  |
| C | -5.48159700 | 4.33931700  | 0.42878500  |
| N | -6.25596100 | 5.20623200  | 0.39633900  |

TS1<sup>P</sup>\_NO<sub>2</sub>

0 1

|    |             |             |             |
|----|-------------|-------------|-------------|
| C  | -3.95304400 | 0.39979800  | 0.22755700  |
| C  | -4.98974400 | 1.32069200  | 0.16751100  |
| C  | -4.68936000 | 2.66680800  | 0.37458500  |
| C  | -3.40298000 | 3.11711900  | 0.66301300  |
| C  | -2.38145800 | 2.17664200  | 0.73497900  |
| H  | -6.01130900 | 1.02666500  | -0.03751100 |
| H  | -3.22989100 | 4.17309300  | 0.82741800  |
| H  | -1.38043400 | 2.50972500  | 0.98909700  |
| C  | -2.62443200 | 0.80190300  | 0.50484200  |
| H  | -2.10524400 | 0.04249600  | 1.43190900  |
| Pd | -1.10222100 | -0.11794100 | -0.65260900 |
| O  | -2.50844500 | -0.66642500 | -2.00830300 |
| C  | -2.71532600 | -1.89951100 | -2.31032100 |
| O  | -2.42401300 | -2.89773900 | -1.60846100 |
| Ag | -1.60658500 | -2.77753400 | 0.39077300  |
| O  | -1.46440800 | -2.50881500 | 2.52521500  |
| C  | -1.74824200 | -1.48049500 | 3.20133000  |
| O  | -1.90952600 | -0.29830300 | 2.74836400  |
| C  | -1.90487600 | -1.64797900 | 4.70014100  |
| H  | -1.58645700 | -0.74449300 | 5.22478800  |

|   |             |             |             |
|---|-------------|-------------|-------------|
| H | -2.96668800 | -1.80882400 | 4.92151200  |
| H | -1.34578200 | -2.51892900 | 5.04728200  |
| C | -3.35981600 | -2.12646900 | -3.65886100 |
| H | -3.90978300 | -3.06915400 | -3.66277200 |
| H | -4.01243400 | -1.29242100 | -3.92505800 |
| H | -2.55934800 | -2.18626400 | -4.40558700 |
| N | 0.46234200  | 0.53225000  | 0.52506300  |
| C | 1.20858200  | 1.62492400  | 0.15513200  |
| C | 0.85030400  | -0.17161900 | 1.57566500  |
| C | 0.88756500  | 2.37720300  | -0.99873800 |
| C | 2.34767300  | 1.97891400  | 0.94120900  |
| C | 1.97486700  | 0.22267000  | 2.34380400  |
| H | 0.29586700  | -1.06628300 | 1.81570400  |
| C | 1.68579300  | 3.43257500  | -1.36873300 |
| H | 0.02753600  | 2.08906300  | -1.59407900 |
| C | 3.15066400  | 3.07312100  | 0.54614900  |
| N | 2.70509300  | 1.27282800  | 2.04828300  |
| H | 2.26543200  | -0.37081900 | 3.20576200  |
| C | 2.82930700  | 3.78524100  | -0.59512600 |
| H | 1.46023800  | 4.00237500  | -2.26301500 |
| H | 4.02188400  | 3.30987300  | 1.14540500  |
| C | 3.65256500  | 4.87973100  | -1.01499800 |
| N | 4.31488700  | 5.77066200  | -1.35906600 |
| N | 4.11959600  | 0.82823700  | -2.05167100 |
| C | 3.06853500  | 0.02282500  | -2.22942600 |
| C | 4.87517900  | 0.63152300  | -0.96530300 |
| C | 2.73713500  | -1.00047700 | -1.33477500 |
| H | 2.44692200  | 0.20864200  | -3.10031900 |
| C | 4.62264500  | -0.36939400 | -0.02395700 |
| H | 5.70822900  | 1.31557300  | -0.82703600 |
| C | 3.53257000  | -1.21635800 | -0.21695100 |
| S | 1.26095800  | -1.98752800 | -1.60964800 |
| C | 5.50221600  | -0.50352000 | 1.18757600  |
| H | 3.28057000  | -1.99389400 | 0.49438300  |
| O | 1.52216800  | -2.91507400 | -2.70758300 |
| O | 0.92000000  | -2.55837300 | -0.27833500 |
| O | 0.24228000  | -0.90900400 | -2.03843200 |
| F | 6.61394900  | -1.21906500 | 0.92577800  |
| F | 4.85508200  | -1.12467500 | 2.20063200  |
| F | 5.90070800  | 0.70631900  | 1.63507400  |
| H | -4.16623000 | -0.65182800 | 0.07060800  |
| N | -5.78270500 | 3.65610000  | 0.29744700  |
| O | -5.49013500 | 4.83719200  | 0.47123400  |
| O | -6.91252700 | 3.23357200  | 0.06354400  |

TS4<sup>p</sup>

0 1

|    |             |             |             |
|----|-------------|-------------|-------------|
| C  | -2.26808400 | -1.16173600 | 0.47081800  |
| C  | -3.64345500 | -1.27697800 | 0.44309600  |
| C  | -4.43383400 | -0.14454500 | 0.17092400  |
| C  | -3.82596900 | 1.10081000  | -0.04754300 |
| C  | -2.43800200 | 1.19319000  | -0.00186300 |
| H  | -4.14368100 | -2.22275700 | 0.62631800  |
| H  | -4.42130200 | 1.98478000  | -0.24494400 |
| H  | -1.98440300 | 2.16581000  | -0.16101700 |
| C  | -1.60524600 | 0.07974900  | 0.25535300  |
| H  | -0.81171400 | 0.33342800  | 1.32637300  |
| Pd | 0.19113700  | 0.03390200  | -0.85576300 |
| O  | -0.49245700 | -1.63675600 | -1.80291800 |
| C  | -0.16496700 | -2.84230500 | -1.52454700 |
| O  | 0.50598500  | -3.23854700 | -0.54046600 |
| Ag | 1.27259300  | -1.84605500 | 1.01060900  |
| O  | 1.05291000  | -0.87294600 | 2.97340000  |
| C  | 0.35959300  | 0.13154100  | 3.27009000  |
| O  | -0.43668900 | 0.77310200  | 2.49920700  |
| C  | 0.48773400  | 0.70081300  | 4.67281300  |
| H  | 0.97915000  | 1.67902000  | 4.61516500  |
| H  | -0.50493400 | 0.86037000  | 5.10352500  |
| H  | 1.07574400  | 0.03589900  | 5.30730800  |
| C  | -0.70591600 | -3.87660800 | -2.49595200 |
| H  | -1.78706100 | -3.97392800 | -2.34473100 |
| H  | -0.54502100 | -3.54579600 | -3.52544600 |
| H  | -0.23090500 | -4.84428000 | -2.32707400 |
| O  | 1.92924800  | -0.09911000 | -2.00987400 |
| C  | 3.00181700  | -0.50318600 | -1.42558500 |
| O  | 3.11163800  | -0.84118200 | -0.22558800 |
| C  | 4.22557300  | -0.58921800 | -2.32602800 |
| H  | 5.12997000  | -0.37403500 | -1.75180600 |
| H  | 4.30389000  | -1.61505900 | -2.70532000 |
| H  | 4.14061500  | 0.08723400  | -3.17933000 |
| N  | 0.95262300  | 1.81720000  | -0.13032800 |
| C  | 1.84478300  | 1.82584500  | 0.87742000  |
| C  | 0.66947400  | 2.96636900  | -0.77095100 |
| C  | 2.47008100  | 2.98873800  | 1.30379200  |
| H  | 2.06287600  | 0.86496800  | 1.31914700  |
| C  | 1.25093600  | 4.18271300  | -0.39528900 |
| C  | 2.15973000  | 4.18412800  | 0.65773600  |
| H  | 3.18428500  | 2.94651000  | 2.11757300  |

|   |             |             |             |
|---|-------------|-------------|-------------|
| H | 1.00405700  | 5.09791000  | -0.91690100 |
| H | 2.62562100  | 5.11616500  | 0.96336400  |
| O | -0.20859300 | 2.81509800  | -1.77690100 |
| C | -0.53870100 | 3.94603000  | -2.57822700 |
| H | -1.03296400 | 4.72217100  | -1.98190200 |
| H | 0.35446400  | 4.35845000  | -3.06049000 |
| H | -1.22541900 | 3.57040600  | -3.33596400 |
| H | -1.67345200 | -2.04397100 | 0.68879100  |
| O | -5.77212100 | -0.35613700 | 0.15611900  |
| C | -6.62827700 | 0.74335000  | -0.11860900 |
| H | -7.64349600 | 0.34540600  | -0.08770700 |
| H | -6.52141100 | 1.53118700  | 0.63755500  |
| H | -6.43043200 | 1.16440300  | -1.11223500 |

TS4<sup>P</sup>\_NHAc

0 1

|    |             |             |             |
|----|-------------|-------------|-------------|
| C  | -1.83405300 | -1.31017100 | 0.52568500  |
| C  | -3.20227000 | -1.50473300 | 0.51873000  |
| C  | -3.54320600 | 0.85440000  | 0.03218400  |
| C  | -2.16458300 | 1.02557300  | 0.05902800  |
| H  | -3.61565400 | -2.49296600 | 0.71259200  |
| H  | -4.21392500 | 1.68061100  | -0.15267300 |
| H  | -1.77519800 | 2.02518600  | -0.09959100 |
| C  | -1.25687600 | -0.03389400 | 0.29679600  |
| H  | -0.44092900 | 0.27685500  | 1.33012500  |
| Pd | 0.52389100  | 0.01571700  | -0.85081700 |
| O  | -0.05353900 | -1.72351100 | -1.74810400 |
| C  | 0.39934500  | -2.88910200 | -1.47764000 |
| O  | 1.10942300  | -3.21854100 | -0.49581300 |
| Ag | 1.76421300  | -1.75453600 | 1.03316600  |
| O  | 1.54727100  | -0.74747200 | 2.97159600  |
| C  | 0.79891700  | 0.22243200  | 3.25179500  |
| O  | -0.06740100 | 0.77306100  | 2.48762900  |
| C  | 0.94447000  | 0.86474100  | 4.62077100  |
| H  | 1.40030200  | 1.85438800  | 4.49892300  |
| H  | -0.04028300 | 1.01321000  | 5.07254000  |
| H  | 1.57473000  | 0.25409500  | 5.26917500  |
| C  | 0.02423600  | -3.96038600 | -2.48611600 |
| H  | -0.99265400 | -3.80164100 | -2.85339900 |
| H  | 0.70397700  | -3.88544400 | -3.34269500 |
| H  | 0.12424300  | -4.95310300 | -2.04344200 |
| O  | 2.23765600  | -0.03079200 | -2.04035800 |
| C  | 3.34909400  | -0.33717700 | -1.46758600 |
| O  | 3.50607900  | -0.62745300 | -0.26107200 |



|   |             |             |             |
|---|-------------|-------------|-------------|
| C | 4.55686300  | -0.36263300 | -2.39282300 |
| H | 5.45072400  | -0.04523200 | -1.85024800 |
| H | 4.71552600  | -1.39526000 | -2.72574000 |
| H | 4.39813200  | 0.26344300  | -3.27346000 |
| N | 1.16135300  | 1.86778300  | -0.18757100 |
| C | 2.07902200  | 1.97277100  | 0.79152300  |
| C | 0.74423300  | 2.97747900  | -0.82541200 |
| C | 2.59254300  | 3.19624900  | 1.19645800  |
| H | 2.40855500  | 1.04070900  | 1.22648700  |
| C | 1.20565700  | 4.24954900  | -0.46732000 |
| C | 2.13861600  | 4.35008700  | 0.55912600  |
| H | 3.33121700  | 3.23279200  | 1.98839100  |
| H | 0.85040600  | 5.13138600  | -0.98376900 |
| H | 2.51254400  | 5.32705200  | 0.85041000  |
| O | -0.13507700 | 2.72892600  | -1.80895400 |
| C | -0.65841100 | 3.82147200  | -2.56053500 |
| H | -1.21231200 | 4.51324300  | -1.91533800 |
| H | 0.14210900  | 4.35659900  | -3.08329100 |
| H | -1.33582200 | 3.37208200  | -3.28556500 |
| H | -1.18528900 | -2.15580900 | 0.73278100  |
| C | -4.07223800 | -0.42755900 | 0.25693200  |
| N | -5.44521200 | -0.70484200 | 0.25318700  |
| H | -5.68339700 | -1.67057700 | 0.43498100  |
| C | -6.50690500 | 0.14614000  | 0.00092200  |
| C | -7.86151700 | -0.54584400 | 0.01619700  |
| H | -8.62175000 | 0.18765000  | 0.28954400  |
| H | -8.09294600 | -0.91684700 | -0.98947000 |
| H | -7.90470800 | -1.39096500 | 0.71131800  |
| O | -6.38506400 | 1.33600800  | -0.24135200 |

TS4<sup>p</sup>\_Me

0 1

|    |             |             |             |
|----|-------------|-------------|-------------|
| C  | -2.67328200 | -0.45948400 | 0.44803300  |
| C  | -4.03644400 | -0.21234200 | 0.38541300  |
| C  | -4.51967000 | 1.07298700  | 0.08825800  |
| C  | -3.59382700 | 2.10265700  | -0.12490300 |
| C  | -2.22652000 | 1.85493000  | -0.04800100 |
| H  | -4.74385600 | -1.01913100 | 0.56430500  |
| H  | -3.95465100 | 3.10404700  | -0.34962900 |
| H  | -1.53448400 | 2.67578300  | -0.20291000 |
| C  | -1.71865600 | 0.56620800  | 0.23305300  |
| H  | -0.86148400 | 0.60080300  | 1.27182400  |
| Pd | 0.03592700  | 0.03807200  | -0.84528700 |
| O  | -1.03957700 | -1.42338700 | -1.77514000 |

|    |             |             |             |
|----|-------------|-------------|-------------|
| C  | -0.98053300 | -2.67375600 | -1.50885600 |
| O  | -0.42745500 | -3.21345300 | -0.51942200 |
| Ag | 0.57639400  | -2.03687100 | 1.06179000  |
| O  | 0.62239800  | -1.00316600 | 2.99436100  |
| C  | 0.20668100  | 0.15455400  | 3.25402500  |
| O  | -0.39045800 | 0.95545400  | 2.45509100  |
| C  | 0.46579000  | 0.71033500  | 4.64402500  |
| H  | 1.19811700  | 1.52268800  | 4.56979300  |
| H  | -0.45408300 | 1.13797500  | 5.05290200  |
| H  | 0.85179800  | -0.06677500 | 5.30550200  |
| C  | -1.66180600 | -3.56475700 | -2.53202000 |
| H  | -2.62524000 | -3.13752400 | -2.82291000 |
| H  | -1.03605600 | -3.61143700 | -3.43032600 |
| H  | -1.79418100 | -4.57223300 | -2.13428300 |
| O  | 1.67505100  | -0.55662100 | -1.98486400 |
| C  | 2.61211700  | -1.20278300 | -1.38126800 |
| O  | 2.63301200  | -1.51932700 | -0.17228400 |
| C  | 3.76985000  | -1.62353200 | -2.27440300 |
| H  | 4.70189400  | -1.62317500 | -1.70411400 |
| H  | 3.58606400  | -2.64853700 | -2.61777200 |
| H  | 3.85366100  | -0.97669200 | -3.15040000 |
| N  | 1.22115700  | 1.58463300  | -0.15017900 |
| C  | 2.08518600  | 1.39011400  | 0.86339700  |
| C  | 1.22724500  | 2.75856400  | -0.80858400 |
| C  | 2.97044000  | 2.37365600  | 1.28026600  |
| H  | 2.06332600  | 0.41034100  | 1.31685500  |
| C  | 2.08246000  | 3.80406700  | -0.44194200 |
| C  | 2.95927000  | 3.60037900  | 0.61833400  |
| H  | 3.65010000  | 2.17160200  | 2.09961100  |
| H  | 2.06611400  | 4.74455500  | -0.97654100 |
| H  | 3.63412600  | 4.39690700  | 0.91708900  |
| O  | 0.34662600  | 2.80720000  | -1.82148000 |
| C  | 0.28387900  | 3.98261700  | -2.62487700 |
| H  | -0.01691800 | 4.85216700  | -2.02872600 |
| H  | 1.24675700  | 4.17733200  | -3.11002800 |
| H  | -0.47311000 | 3.77383900  | -3.37990200 |
| H  | -2.32632000 | -1.46111300 | 0.68498000  |
| C  | -6.00211000 | 1.33948700  | 0.03778700  |
| H  | -6.22514200 | 2.27251900  | -0.48891200 |
| H  | -6.53657200 | 0.52486900  | -0.46316600 |
| H  | -6.41833300 | 1.42335700  | 1.05055600  |

TS4P\_H

0 1

|    |             |             |             |
|----|-------------|-------------|-------------|
| C  | -1.42200500 | 2.50854200  | 0.46803400  |
| C  | -1.68222900 | 3.87284500  | 0.41112700  |
| C  | -0.64328800 | 4.76613700  | 0.12868700  |
| C  | 0.65572600  | 4.29324000  | -0.07223800 |
| C  | 0.91098300  | 2.92547800  | 0.00008900  |
| H  | -2.68831500 | 4.24542300  | 0.58375400  |
| H  | 1.46249700  | 4.99164900  | -0.27915000 |
| H  | 1.92572700  | 2.56834200  | -0.13897300 |
| C  | -0.11936500 | 1.99384600  | 0.26097700  |
| H  | 0.20657900  | 1.17206700  | 1.27404900  |
| Pd | 0.03025300  | 0.16807100  | -0.83289500 |
| O  | -1.71246600 | 0.65534000  | -1.77150400 |
| C  | -2.85699200 | 0.13491900  | -1.53180300 |
| O  | -3.16898800 | -0.59666200 | -0.56035800 |
| Ag | -1.73425200 | -1.10938100 | 1.03921500  |
| O  | -0.77347200 | -0.80480000 | 2.98170300  |
| C  | 0.15356300  | -0.00017600 | 3.25533200  |
| O  | 0.69560400  | 0.84650400  | 2.46503100  |
| C  | 0.74579500  | -0.04404200 | 4.65360600  |
| H  | 1.77432000  | -0.41802400 | 4.59192700  |
| H  | 0.79172700  | 0.96608900  | 5.07062600  |
| H  | 0.15956000  | -0.69711700 | 5.30183900  |
| C  | -3.92104400 | 0.45911700  | -2.56469000 |
| H  | -3.87279000 | 1.51669000  | -2.83757400 |
| H  | -3.72220600 | -0.12543500 | -3.46993400 |
| H  | -4.91230700 | 0.20636900  | -2.18494500 |
| O  | 0.07491600  | -1.55166200 | -1.99898300 |
| C  | -0.18853800 | -2.66918400 | -1.41228300 |
| O  | -0.47836000 | -2.82063600 | -0.20669900 |
| C  | -0.15797200 | -3.88556100 | -2.32545100 |
| H  | 0.17648100  | -4.76357000 | -1.76770100 |
| H  | -1.17844500 | -4.07870200 | -2.67703700 |
| H  | 0.47964400  | -3.71562100 | -3.19569900 |
| N  | 1.89513700  | -0.39196000 | -0.13571700 |
| C  | 2.02040100  | -1.27738700 | 0.87025200  |
| C  | 2.99442400  | 0.02804900  | -0.78921400 |
| C  | 3.25489200  | -1.75597100 | 1.28458500  |
| H  | 1.09681700  | -1.61120300 | 1.31907100  |
| C  | 4.27597900  | -0.40016700 | -0.42449100 |
| C  | 4.39745200  | -1.30114500 | 0.62812000  |
| H  | 3.30820200  | -2.47012200 | 2.09772300  |
| H  | 5.14923600  | -0.04388200 | -0.95463200 |
| H  | 5.38213100  | -1.64931600 | 0.92528200  |
| O  | 2.72573500  | 0.87686300  | -1.79445600 |

|   |             |            |             |
|---|-------------|------------|-------------|
| C | 3.80157400  | 1.36394400 | -2.59249700 |
| H | 4.50511100  | 1.95044400 | -1.99004100 |
| H | 4.32841100  | 0.53914800 | -3.08494900 |
| H | 3.33615500  | 2.00307600 | -3.34185100 |
| H | -2.23066100 | 1.81969800 | 0.69445000  |
| H | -0.84550800 | 5.83289300 | 0.07712600  |

TS4P\_C1

0 1

|    |             |             |             |
|----|-------------|-------------|-------------|
| C  | -2.40998000 | -0.84744700 | 0.49179400  |
| C  | -3.79660500 | -0.81108800 | 0.42593500  |
| C  | -4.42158800 | 0.40351600  | 0.13105000  |
| C  | -3.68874900 | 1.57308300  | -0.07282100 |
| C  | -2.30055600 | 1.51313200  | 0.01213800  |
| H  | -4.39274800 | -1.70098500 | 0.59670400  |
| H  | -4.20241700 | 2.50406200  | -0.28781400 |
| H  | -1.73270000 | 2.42580300  | -0.13109700 |
| C  | -1.61685500 | 0.30686200  | 0.28406900  |
| H  | -0.73658800 | 0.44667300  | 1.28749600  |
| Pd | 0.18535700  | 0.04223800  | -0.83244100 |
| O  | -0.69617000 | -1.54267400 | -1.76126400 |
| C  | -0.45406800 | -2.77652500 | -1.51838800 |
| O  | 0.19193300  | -3.24478200 | -0.54932700 |
| Ag | 1.04431300  | -1.96506400 | 1.03680200  |
| O  | 0.98577100  | -0.94975900 | 2.97414000  |
| C  | 0.41737300  | 0.13674100  | 3.25329000  |
| O  | -0.29723100 | 0.85361100  | 2.47111900  |
| C  | 0.61790100  | 0.70934000  | 4.64564400  |
| H  | 1.22445600  | 1.61933600  | 4.57063400  |
| H  | -0.34682300 | 0.99590400  | 5.07387500  |
| H  | 1.12240800  | -0.01120900 | 5.29109100  |
| C  | -1.02705500 | -3.73939700 | -2.54193600 |
| H  | -2.05524500 | -3.46015600 | -2.78768700 |
| H  | -0.43689000 | -3.66786300 | -3.46229000 |
| H  | -0.98801500 | -4.76350000 | -2.16755900 |
| O  | 1.85459400  | -0.30421700 | -2.01424800 |
| C  | 2.88800500  | -0.81892700 | -1.43875200 |
| O  | 2.98000500  | -1.13832100 | -0.23495600 |
| C  | 4.06880300  | -1.06589200 | -2.36499300 |
| H  | 5.00579400  | -0.94774600 | -1.81564700 |
| H  | 4.01599700  | -2.10109700 | -2.72247900 |
| H  | 4.04277000  | -0.40105000 | -3.23100900 |
| N  | 1.16028800  | 1.73143800  | -0.14376500 |
| C  | 2.06609100  | 1.64968800  | 0.84871000  |

|    |             |             |             |
|----|-------------|-------------|-------------|
| C  | 0.98909000  | 2.89990800  | -0.78984300 |
| C  | 2.81812200  | 2.74218700  | 1.25509000  |
| H  | 2.18855000  | 0.67308500  | 1.29275200  |
| C  | 1.70286700  | 4.04955600  | -0.43282500 |
| C  | 2.62444800  | 3.96012900  | 0.60499800  |
| H  | 3.53805800  | 2.62970300  | 2.05700100  |
| H  | 1.54515200  | 4.98270100  | -0.95714100 |
| H  | 3.19152500  | 4.83918700  | 0.89606600  |
| O  | 0.08305800  | 2.83499600  | -1.77911500 |
| C  | -0.14978300 | 3.99239400  | -2.57890800 |
| H  | -0.54942900 | 4.81510900  | -1.97461000 |
| H  | 0.76943800  | 4.31053200  | -3.08278500 |
| H  | -0.88819900 | 3.68580300  | -3.31872600 |
| H  | -1.92238400 | -1.78889900 | 0.72693600  |
| Cl | -6.17083900 | 0.46324800  | 0.03405400  |

TS4P\_CN

0 1

|    |             |             |             |
|----|-------------|-------------|-------------|
| C  | -2.50675800 | -0.77737500 | 0.53817700  |
| C  | -3.88988300 | -0.70471200 | 0.46746000  |
| C  | -3.72178600 | 1.67804700  | -0.02115100 |
| C  | -2.33740700 | 1.58640200  | 0.06804200  |
| H  | -4.50535500 | -1.58293000 | 0.63289800  |
| H  | -4.20839900 | 2.62424600  | -0.23500400 |
| H  | -1.74284400 | 2.48247200  | -0.06818200 |
| C  | -1.69143000 | 0.35939000  | 0.33106100  |
| H  | -0.75538700 | 0.45218800  | 1.27640900  |
| Pd | 0.10616900  | 0.05882400  | -0.81136200 |
| O  | -0.84121600 | -1.48621500 | -1.74017500 |
| C  | -0.61343100 | -2.72991200 | -1.53214700 |
| O  | 0.05058600  | -3.22935800 | -0.59160800 |
| Ag | 0.93982500  | -2.00789200 | 1.01350800  |
| O  | 0.94927400  | -1.00410600 | 2.95110500  |
| C  | 0.41008600  | 0.09428600  | 3.24452700  |
| O  | -0.29005900 | 0.83597700  | 2.47338000  |
| C  | 0.63319800  | 0.64651800  | 4.64142400  |
| H  | 1.25149100  | 1.54890100  | 4.57187800  |
| H  | -0.32332900 | 0.94115100  | 5.08247200  |
| H  | 1.13292800  | -0.08935100 | 5.27305900  |
| C  | -1.22877900 | -3.65905900 | -2.56135500 |
| H  | -2.25467700 | -3.35195300 | -2.78169900 |
| H  | -0.65474100 | -3.58333400 | -3.49154800 |
| H  | -1.20572900 | -4.69067700 | -2.20697000 |
| O  | 1.72218100  | -0.31787200 | -2.04030700 |

|   |             |             |             |
|---|-------------|-------------|-------------|
| C | 2.75653400  | -0.86916400 | -1.49642100 |
| O | 2.86963700  | -1.20003200 | -0.29916700 |
| C | 3.90060100  | -1.14212400 | -2.45975900 |
| H | 4.85597300  | -1.06238100 | -1.93595600 |
| H | 3.80243100  | -2.17002300 | -2.82844000 |
| H | 3.87205200  | -0.46524100 | -3.31622500 |
| N | 1.14799400  | 1.71105500  | -0.13282900 |
| C | 2.07249500  | 1.59498300  | 0.83899500  |
| C | 0.99640600  | 2.88836900  | -0.76795300 |
| C | 2.86513200  | 2.66206100  | 1.23488700  |
| H | 2.17513800  | 0.61223400  | 1.27450200  |
| C | 1.75227400  | 4.01359700  | -0.42014100 |
| C | 2.69351300  | 3.88951400  | 0.59615700  |
| H | 3.59890700  | 2.52334300  | 2.01992600  |
| H | 1.61053700  | 4.95463800  | -0.93478900 |
| H | 3.29293400  | 4.74927200  | 0.87982100  |
| O | 0.06575900  | 2.85657300  | -1.73535900 |
| C | -0.14723900 | 4.02370400  | -2.52787200 |
| H | -0.50762000 | 4.85652300  | -1.91306100 |
| H | 0.77096600  | 4.31335200  | -3.05015800 |
| H | -0.91044400 | 3.74268100  | -3.25245500 |
| H | -2.03848000 | -1.72888800 | 0.77070300  |
| C | -4.50288300 | 0.52718000  | 0.17378600  |
| C | -5.92998800 | 0.61304000  | 0.08622400  |
| N | -7.08873100 | 0.68617200  | 0.01482300  |

TS4<sup>P</sup>\_NO<sub>2</sub>

0 1

|    |             |             |             |
|----|-------------|-------------|-------------|
| C  | -2.27225600 | -0.91504400 | 0.53226600  |
| C  | -3.65833200 | -0.91172400 | 0.45290500  |
| C  | -3.60479000 | 1.48556900  | -0.01841500 |
| C  | -2.21679700 | 1.45996600  | 0.08008200  |
| H  | -4.24655300 | -1.80812600 | 0.60372700  |
| H  | -4.15281500 | 2.39558800  | -0.22780400 |
| H  | -1.66578500 | 2.38458700  | -0.04548500 |
| C  | -1.51518200 | 0.26283800  | 0.33629900  |
| H  | -0.57210000 | 0.38761600  | 1.26744300  |
| Pd | 0.30234600  | 0.06418600  | -0.80699300 |
| O  | -0.57240300 | -1.51328500 | -1.75148300 |
| C  | -0.28016400 | -2.74684300 | -1.56216100 |
| O  | 0.41637700  | -3.22364400 | -0.63376100 |
| Ag | 1.23615900  | -1.98390400 | 0.99235600  |
| O  | 1.19770500  | -1.00222900 | 2.93847800  |
| C  | 0.60525100  | 0.06619200  | 3.24068700  |

|   |             |             |             |
|---|-------------|-------------|-------------|
| O | -0.12650700 | 0.78115700  | 2.47396100  |
| C | 0.79553200  | 0.61322100  | 4.64441100  |
| H | 1.35973600  | 1.55111900  | 4.58701100  |
| H | -0.17699200 | 0.84582100  | 5.08767900  |
| H | 1.33646500  | -0.10025300 | 5.26770400  |
| C | -0.86335900 | -3.69164000 | -2.59563400 |
| H | -1.92597000 | -3.47707500 | -2.74083800 |
| H | -0.36051600 | -3.52368800 | -3.55414500 |
| H | -0.72375800 | -4.72871500 | -2.28741500 |
| O | 1.92640200  | -0.21951400 | -2.04471900 |
| C | 2.98808400  | -0.72853600 | -1.51063600 |
| O | 3.12124500  | -1.06641100 | -0.31794000 |
| C | 4.13790000  | -0.93745400 | -2.48281700 |
| H | 5.09140900  | -0.82545300 | -1.96164300 |
| H | 4.08118600  | -1.96257300 | -2.86756000 |
| H | 4.07650500  | -0.24904800 | -3.32829300 |
| N | 1.26545500  | 1.75720100  | -0.11340400 |
| C | 2.19802000  | 1.67525400  | 0.85423100  |
| C | 1.05219300  | 2.93330300  | -0.73305600 |
| C | 2.93756500  | 2.77568400  | 1.26109900  |
| H | 2.35088100  | 0.69350500  | 1.27716200  |
| C | 1.75211500  | 4.09049500  | -0.37322900 |
| C | 2.70221800  | 4.00089600  | 0.63837500  |
| H | 3.68012000  | 2.66429900  | 2.04221200  |
| H | 1.56132200  | 5.02964200  | -0.87531900 |
| H | 3.25886800  | 4.88599000  | 0.93108700  |
| O | 0.12044900  | 2.86678400  | -1.69736100 |
| C | -0.16018400 | 4.03357500  | -2.46960000 |
| H | -0.55927900 | 4.83603500  | -1.83866900 |
| H | 0.73736300  | 4.37944700  | -2.99351400 |
| H | -0.91321900 | 3.72390500  | -3.19310000 |
| H | -1.75849900 | -1.84350800 | 0.76111700  |
| C | -4.30039100 | 0.29315300  | 0.16554600  |
| N | -5.76899000 | 0.30849700  | 0.06507600  |
| O | -6.31203700 | 1.38202900  | -0.19521500 |
| O | -6.36442200 | -0.75257600 | 0.24625800  |

PhNHAc

0 1

|   |            |             |             |
|---|------------|-------------|-------------|
| C | 0.74605200 | 1.03879900  | -0.00003200 |
| C | 2.11600600 | 1.30051400  | -0.00003200 |
| C | 3.05271800 | 0.26651400  | -0.00001100 |
| C | 2.60600700 | -1.05603400 | 0.00002100  |
| C | 1.24269600 | -1.33485900 | 0.00002800  |

|   |             |             |             |
|---|-------------|-------------|-------------|
| C | 0.30328200  | -0.29229000 | -0.00000400 |
| H | 0.01984300  | 1.83827500  | -0.00005700 |
| H | 2.45055100  | 2.33423400  | -0.00005400 |
| H | 4.11597200  | 0.48667500  | -0.00001200 |
| H | 3.31849800  | -1.87607100 | 0.00004100  |
| H | 0.90014700  | -2.36788800 | 0.00006400  |
| N | -1.06002100 | -0.65353500 | 0.00002400  |
| C | -2.17022200 | 0.16129600  | 0.00001700  |
| H | -1.23512500 | -1.64831600 | -0.00020800 |
| O | -2.12685100 | 1.38304500  | 0.00007100  |
| C | -3.49631900 | -0.58648600 | -0.00004600 |
| H | -3.39867500 | -1.67668800 | 0.00026900  |
| H | -4.06892700 | -0.28204900 | 0.88125100  |
| H | -4.06864200 | -0.28250900 | -0.88168500 |

PhMe

0 1

|   |             |             |             |
|---|-------------|-------------|-------------|
| C | -0.19467600 | 1.20244900  | -0.00906500 |
| C | 1.20052800  | 1.20534200  | 0.00220600  |
| C | 1.90384500  | -0.00014000 | 0.00854300  |
| C | 1.20016600  | -1.20553500 | 0.00221000  |
| C | -0.19492300 | -1.20231500 | -0.00906700 |
| C | -0.91304500 | 0.00021400  | -0.01153700 |
| H | -0.73585600 | 2.14578900  | -0.01786200 |
| H | 1.73817800  | 2.14970900  | 0.00157500  |
| H | 2.99019400  | -0.00031600 | 0.01399100  |
| H | 1.73764600  | -2.15000100 | 0.00158600  |
| H | -0.73635700 | -2.14552400 | -0.01788900 |
| C | -2.42302500 | 0.00008700  | 0.00943400  |
| H | -2.83075100 | -0.88084800 | -0.49790300 |
| H | -2.80568800 | -0.01122800 | 1.03884900  |
| H | -2.83059300 | 0.89181200  | -0.47868600 |

PhH

0 1

|   |             |             |             |
|---|-------------|-------------|-------------|
| C | -1.33846600 | -0.39754200 | 0.00000400  |
| C | -0.32483700 | -1.35790600 | 0.00006600  |
| C | 1.01349800  | -0.96036500 | -0.00005400 |
| C | 1.33843100  | 0.39765300  | 0.00000700  |
| C | 0.32495000  | 1.35787600  | 0.00006000  |
| C | -1.01357700 | 0.96028600  | -0.00005600 |
| H | -2.37973500 | -0.70694700 | -0.00006500 |
| H | -0.57774600 | -2.41433100 | 0.00008000  |
| H | 1.80212100  | -1.70738400 | -0.00015000 |



|   |             |            |             |
|---|-------------|------------|-------------|
| H | 2.37977200  | 0.70679300 | 0.00000900  |
| H | 0.57761100  | 2.41435300 | 0.00001600  |
| H | -1.80202000 | 1.70750500 | -0.00006000 |

PhCl

0 1

|    |             |             |             |
|----|-------------|-------------|-------------|
| C  | 0.17767400  | -1.21611400 | -0.00000600 |
| C  | 1.57318400  | -1.20747600 | 0.00001400  |
| C  | 2.27338000  | 0.00000300  | -0.00000900 |
| C  | 1.57315800  | 1.20748900  | 0.00000500  |
| C  | 0.17766900  | 1.21611400  | 0.00000200  |
| C  | -0.50393000 | -0.00001500 | -0.00002100 |
| H  | -0.37623800 | -2.14838800 | 0.00000200  |
| H  | 2.11119200  | -2.15104400 | 0.00001600  |
| H  | 3.35914200  | 0.00002800  | -0.00000900 |
| H  | 2.11118400  | 2.15104900  | 0.00000700  |
| H  | -0.37628900 | 2.14835900  | 0.00001200  |
| Cl | -2.26210600 | 0.00000000  | 0.00000400  |

PhCN

0 1

|   |             |             |             |
|---|-------------|-------------|-------------|
| C | 0.09085300  | -1.21749200 | 0.00000000  |
| C | 1.48306500  | -1.21089500 | 0.00000800  |
| C | 2.17932600  | 0.00002200  | -0.00000500 |
| C | 1.48299500  | 1.21093700  | 0.00000100  |
| C | 0.09081500  | 1.21747600  | 0.00000600  |
| C | -0.60965300 | -0.00004100 | -0.00000700 |
| H | -0.46052700 | -2.15165800 | -0.00000400 |
| H | 2.02524600  | -2.15147900 | 0.00000200  |
| H | 3.26530500  | 0.00007400  | -0.00001400 |
| H | 2.02518400  | 2.15151700  | -0.00000200 |
| H | -0.46065300 | 2.15159000  | 0.00000500  |
| C | -2.04288000 | -0.00003100 | -0.00000300 |
| N | -3.20595400 | 0.00001500  | 0.00000200  |

PhNO<sub>2</sub>

0 1

|   |             |             |             |
|---|-------------|-------------|-------------|
| C | 0.42626600  | -1.22075000 | 0.00000300  |
| C | 1.81924800  | -1.21238700 | -0.00000600 |
| C | 2.51433000  | -0.00000100 | -0.00000600 |
| C | 1.81924300  | 1.21238900  | 0.00000000  |
| C | 0.42626600  | 1.22075100  | 0.00000700  |
| C | -0.24494800 | -0.00000200 | 0.00000900  |
| H | -0.14286300 | -2.14159700 | 0.00000600  |

|   |             |             |             |
|---|-------------|-------------|-------------|
| H | 2.36161400  | -2.15268800 | -0.00001100 |
| H | 3.60032500  | 0.00000400  | -0.00001100 |
| H | 2.36161500  | 2.15268700  | 0.00000000  |
| H | -0.14287200 | 2.14159300  | 0.00001300  |
| N | -1.71608700 | -0.00000100 | 0.00002500  |
| O | -2.28672600 | 1.09004800  | -0.00002000 |
| O | -2.28672900 | -1.09004800 | -0.00000700 |

Pre\_TS5

0 1

|   |            |             |             |
|---|------------|-------------|-------------|
| C | 2.26105000 | 2.97449100  | -0.07671400 |
| C | 2.60110100 | 4.23173900  | -0.58503800 |
| C | 2.88833100 | 4.37422800  | -1.94753300 |
| C | 2.83749200 | 3.27467000  | -2.79766200 |
| C | 2.49839100 | 2.01603000  | -2.27800700 |
| H | 2.64116100 | 5.09953100  | 0.06378500  |
| H | 3.06215300 | 3.38267300  | -3.85486100 |
| H | 2.46934500 | 1.15421800  | -2.94018100 |
| C | 2.20971200 | 1.85683700  | -0.92625400 |
| H | 3.15166100 | 5.35452000  | -2.33411200 |
| O | 1.95325800 | 2.73404100  | 1.23760600  |
| C | 1.94748200 | 3.82682800  | 2.14035000  |
| H | 2.94008500 | 4.28867000  | 2.21957900  |
| H | 1.21754000 | 4.59002700  | 1.84017600  |
| H | 1.66306400 | 3.41052400  | 3.10761600  |
| C | 3.13994400 | -1.20777000 | 0.46951900  |
| C | 3.75982200 | -0.03176500 | 0.07389500  |
| C | 3.51730000 | -2.28014400 | -0.54199900 |
| C | 2.69527400 | -1.49124700 | 1.86554900  |
| H | 3.99572700 | 0.78778300  | 0.74191800  |
| C | 4.53399300 | -0.35874900 | -1.18660200 |
| C | 3.64183600 | -1.44337400 | -1.83040700 |
| C | 5.02466000 | -2.56800100 | -0.24388100 |
| H | 2.86403100 | -3.15021800 | -0.56052200 |
| O | 2.35944600 | -0.64784400 | 2.67778400  |
| O | 2.72326500 | -2.80671600 | 2.11273900  |
| C | 5.72520500 | -1.24194400 | -0.67500900 |
| H | 4.82323200 | 0.49572000  | -1.79733700 |
| H | 2.67610200 | -1.07675500 | -2.18900100 |
| H | 4.14827000 | -1.98489100 | -2.63552000 |
| H | 5.19257500 | -2.82446300 | 0.80506100  |
| H | 5.36298100 | -3.41356600 | -0.85041900 |
| C | 2.18035300 | -3.21040700 | 3.38005800  |
| H | 6.27201600 | -0.76221000 | 0.14247100  |

|     |             |             |             |
|-----|-------------|-------------|-------------|
| H   | 6.43379800  | -1.40798100 | -1.49230400 |
| H   | 2.29006400  | -4.29370600 | 3.40994900  |
| H   | 2.72636000  | -2.73867600 | 4.20068900  |
| H   | 1.12587800  | -2.92910000 | 3.43096000  |
| Pd  | 1.46842400  | 0.13075700  | -0.21491500 |
| N   | -0.40380800 | 1.02253200  | -0.50251000 |
| O   | 0.40252700  | -1.62676600 | 0.46530800  |
| C   | -1.22513300 | 1.21715400  | 0.57614100  |
| C   | -0.87157400 | 1.27058800  | -1.71181600 |
| S   | -0.34393400 | -2.40148100 | -0.63162200 |
| C   | -0.77428800 | 0.96005900  | 1.89421000  |
| C   | -2.56044400 | 1.67150600  | 0.34886100  |
| C   | -2.19780000 | 1.73136000  | -1.90211900 |
| H   | -0.20350300 | 1.10196800  | -2.54641800 |
| C   | -2.04675500 | -1.95462500 | -0.25951000 |
| O   | -0.20409800 | -3.84934300 | -0.44543900 |
| O   | -0.06840500 | -1.84401900 | -1.97526600 |
| C   | -1.64084400 | 1.12700600  | 2.94604600  |
| H   | 0.24542700  | 0.62660100  | 2.05368400  |
| C   | -3.43170800 | 1.83962000  | 1.44988700  |
| N   | -3.02920000 | 1.92802600  | -0.90314900 |
| H   | -2.56551800 | 1.91313400  | -2.90780700 |
| C   | -2.50911900 | -1.97488500 | 1.06123800  |
| C   | -2.89765800 | -1.53168200 | -1.27091900 |
| C   | -2.98111000 | 1.56335400  | 2.72731500  |
| H   | -1.31444200 | 0.92133400  | 3.95938400  |
| H   | -4.44579500 | 2.16886200  | 1.25699700  |
| N   | -3.74156100 | -1.59367400 | 1.40628000  |
| H   | -1.84762500 | -2.28671500 | 1.86408400  |
| C   | -4.18227200 | -1.12218200 | -0.91324600 |
| H   | -2.54659500 | -1.48981300 | -2.29533100 |
| C   | -3.86136300 | 1.71517700  | 3.84731800  |
| C   | -4.55636500 | -1.17306700 | 0.43071000  |
| C   | -5.14613900 | -0.62315000 | -1.95131400 |
| N   | -4.56577900 | 1.84287900  | 4.76322700  |
| H   | -5.54513600 | -0.84252700 | 0.73705200  |
| F   | -5.92486300 | -1.61502900 | -2.43306300 |
| F   | -4.49632900 | -0.08298100 | -3.01050800 |
| F   | -5.96760500 | 0.32188500  | -1.45028800 |
| TS5 |             |             |             |
| 01  |             |             |             |
| C   | 1.79526700  | 2.81206300  | -0.27894800 |
| C   | 1.49306100  | 4.00675000  | -0.93964900 |

|    |             |             |             |
|----|-------------|-------------|-------------|
| C  | 1.54588400  | 4.06073200  | -2.33531500 |
| C  | 1.91128500  | 2.93643600  | -3.07411400 |
| C  | 2.20984900  | 1.74502400  | -2.40838400 |
| H  | 1.21562800  | 4.89162100  | -0.37874000 |
| H  | 1.96551800  | 2.98202100  | -4.15759900 |
| H  | 2.49320100  | 0.87153400  | -2.98619700 |
| C  | 2.12817700  | 1.65034300  | -1.01354000 |
| H  | 1.30843000  | 4.99311200  | -2.83910000 |
| O  | 1.78973400  | 2.67074200  | 1.07363400  |
| C  | 1.42226700  | 3.77722800  | 1.88310300  |
| H  | 2.09786000  | 4.62781500  | 1.73006200  |
| H  | 0.38949100  | 4.08732400  | 1.68187800  |
| H  | 1.50512000  | 3.42450100  | 2.91139000  |
| C  | 3.31600200  | -0.66038700 | 0.45802800  |
| C  | 3.68570900  | 0.62694000  | -0.07207500 |
| C  | 4.09262600  | -1.70232600 | -0.34418000 |
| C  | 3.00288400  | -0.84625300 | 1.90402100  |
| H  | 3.81506300  | 1.46471900  | 0.60372900  |
| C  | 4.68341300  | 0.32437100  | -1.17523400 |
| C  | 4.16539400  | -1.02347700 | -1.72486700 |
| C  | 5.57028900  | -1.56115400 | 0.12340700  |
| H  | 3.67927400  | -2.70799000 | -0.29968900 |
| O  | 2.55870700  | 0.01488000  | 2.64589800  |
| O  | 3.24245500  | -2.11084000 | 2.28890600  |
| C  | 5.96375800  | -0.14887700 | -0.40940600 |
| H  | 4.85374400  | 1.13544700  | -1.88320600 |
| H  | 3.19166600  | -0.96555200 | -2.21809600 |
| H  | 4.88210900  | -1.50512200 | -2.39732000 |
| H  | 5.66933400  | -1.65552400 | 1.20728600  |
| H  | 6.18361900  | -2.34367000 | -0.33484200 |
| C  | 2.79494500  | -2.45334400 | 3.60931300  |
| H  | 6.24417300  | 0.54629800  | 0.38834000  |
| H  | 6.80406500  | -0.19918700 | -1.10863100 |
| H  | 3.08761400  | -3.49272500 | 3.75385700  |
| H  | 3.26386500  | -1.80762400 | 4.35584500  |
| H  | 1.70853100  | -2.35100100 | 3.66748500  |
| Pd | 1.42133000  | -0.17100800 | -0.27956600 |
| N  | -0.52954300 | 0.51525900  | -0.85130900 |
| O  | 0.75945800  | -2.04612600 | 0.45672100  |
| C  | -1.34781600 | 1.10031700  | 0.07675400  |
| C  | -0.95749100 | 0.42082200  | -2.09541700 |
| S  | -0.21598500 | -2.85898800 | -0.41030900 |
| C  | -0.94730300 | 1.20206400  | 1.43130100  |
| C  | -2.62580100 | 1.58869300  | -0.33075900 |

|   |             |             |             |
|---|-------------|-------------|-------------|
| C | -2.22741900 | 0.92617100  | -2.47493100 |
| H | -0.31050800 | -0.07925200 | -2.80426000 |
| C | -1.80802600 | -2.24463000 | 0.16771300  |
| O | -0.14327700 | -4.28285200 | -0.07365200 |
| O | -0.13926500 | -2.47430800 | -1.83705000 |
| C | -1.80011600 | 1.76358600  | 2.34920700  |
| H | 0.02985300  | 0.83031300  | 1.72284200  |
| C | -3.48927800 | 2.16159500  | 0.63147000  |
| N | -3.04551500 | 1.50333900  | -1.62363300 |
| H | -2.55782700 | 0.83202900  | -3.50602300 |
| C | -2.00704800 | -1.96889500 | 1.52246200  |
| C | -2.83678600 | -1.99632900 | -0.73364900 |
| C | -3.08212300 | 2.24537500  | 1.95125800  |
| H | -1.51355800 | 1.83252100  | 3.39250100  |
| H | -4.46443900 | 2.50518000  | 0.30786800  |
| N | -3.14401900 | -1.45311400 | 2.00443200  |
| H | -1.20572300 | -2.14362900 | 2.23422100  |
| C | -4.01818400 | -1.44933000 | -0.23869400 |
| H | -2.69489400 | -2.18809200 | -1.79053300 |
| C | -3.95241700 | 2.81631900  | 2.93592000  |
| C | -4.12351700 | -1.19625900 | 1.13299200  |
| C | -5.16722300 | -1.11711100 | -1.14702300 |
| N | -4.64850200 | 3.28437800  | 3.74091500  |
| H | -5.02803100 | -0.75083000 | 1.53918900  |
| F | -6.14100900 | -2.04971000 | -1.08764800 |
| F | -4.77647200 | -1.02781900 | -2.43751900 |
| F | -5.73247800 | 0.06377400  | -0.80598500 |

Pro 5

0 1

|   |            |            |             |
|---|------------|------------|-------------|
| C | 2.01831200 | 2.63387800 | -0.55055800 |
| C | 1.04866800 | 3.31901200 | -1.29130600 |
| C | 0.76368300 | 2.92785300 | -2.60061000 |
| C | 1.43262600 | 1.85653300 | -3.18729700 |
| C | 2.37720400 | 1.14749200 | -2.44287100 |
| H | 0.53621700 | 4.17124900 | -0.86269900 |
| H | 1.22620300 | 1.56946000 | -4.21308200 |
| H | 2.93037100 | 0.34972700 | -2.91898800 |
| C | 2.67960900 | 1.48483900 | -1.09772000 |
| H | 0.01733700 | 3.47978400 | -3.16499600 |
| O | 2.42973900 | 3.01254300 | 0.67077600  |
| C | 1.71694000 | 4.02792300 | 1.36720900  |
| H | 1.83246900 | 5.00137600 | 0.87525700  |
| H | 0.65461100 | 3.77451700 | 1.44358200  |

|    |             |             |             |
|----|-------------|-------------|-------------|
| H  | 2.15817600  | 4.06110800  | 2.36284700  |
| C  | 3.24814400  | -0.41010000 | 0.42548100  |
| C  | 3.83166000  | 0.82201400  | -0.31084300 |
| C  | 4.12198400  | -1.58992400 | 0.00832200  |
| C  | 2.82497000  | -0.29439800 | 1.85234900  |
| H  | 4.23549900  | 1.56818900  | 0.37701200  |
| C  | 4.94964400  | 0.16953600  | -1.16210500 |
| C  | 4.41566100  | -1.25349900 | -1.46296800 |
| C  | 5.52697800  | -1.36902000 | 0.64016000  |
| H  | 3.67403300  | -2.56047500 | 0.21561800  |
| O  | 2.23573600  | 0.66222200  | 2.34310700  |
| O  | 3.08550900  | -1.41613400 | 2.54894500  |
| C  | 6.09996200  | -0.17054300 | -0.18305000 |
| H  | 5.25656500  | 0.77614800  | -2.01891600 |
| H  | 3.52408200  | -1.31015800 | -2.09018200 |
| H  | 5.18734500  | -1.89762300 | -1.89793600 |
| H  | 5.47039500  | -1.16495100 | 1.71130700  |
| H  | 6.13655700  | -2.26956400 | 0.51137300  |
| C  | 2.50025800  | -1.48982900 | 3.85624600  |
| H  | 6.36945900  | 0.68523400  | 0.44471600  |
| H  | 6.99598100  | -0.46327600 | -0.73981800 |
| H  | 2.80786100  | -2.45490200 | 4.25765200  |
| H  | 2.85810900  | -0.67302600 | 4.48813400  |
| H  | 1.41102900  | -1.43853700 | 3.78005000  |
| Pd | 1.38319600  | -0.25301800 | -0.41290600 |
| N  | -0.61755300 | 0.30480900  | -1.08852300 |
| O  | 0.88102200  | -2.06543000 | 0.53305600  |
| C  | -1.39743800 | 1.08290000  | -0.27641400 |
| C  | -1.09572200 | -0.03708100 | -2.26899300 |
| S  | -0.20240700 | -2.96331400 | -0.09407800 |
| C  | -0.95740100 | 1.44010300  | 1.02265600  |
| C  | -2.67722600 | 1.51442000  | -0.73743700 |
| C  | -2.36855700 | 0.41085700  | -2.70711700 |
| H  | -0.48659600 | -0.69613500 | -2.87418200 |
| C  | -1.71419200 | -2.20589900 | 0.52830500  |
| O  | -0.12298000 | -4.31441800 | 0.46571000  |
| O  | -0.26735500 | -2.81732600 | -1.56341300 |
| C  | -1.77194900 | 2.19110100  | 1.83359500  |
| H  | 0.01394000  | 1.10108000  | 1.37274900  |
| C  | -3.49756200 | 2.29495300  | 0.11062400  |
| N  | -3.14300000 | 1.17829600  | -1.97283000 |
| H  | -2.73725500 | 0.11346300  | -3.68561000 |
| C  | -1.76903700 | -1.69523600 | 1.82649600  |
| C  | -2.82937500 | -2.08982400 | -0.29408100 |

|   |             |             |             |
|---|-------------|-------------|-------------|
| C | -3.05184400 | 2.62591200  | 1.37778200  |
| H | -1.45638000 | 2.44701100  | 2.83885300  |
| H | -4.47304000 | 2.59607800  | -0.25148800 |
| N | -2.84432700 | -1.07019200 | 2.32176700  |
| H | -0.90092500 | -1.76916000 | 2.47488300  |
| C | -3.94659700 | -1.43118800 | 0.21242000  |
| H | -2.80072200 | -2.46753900 | -1.30913300 |
| C | -3.87857300 | 3.40574000  | 2.25024600  |
| C | -3.90585200 | -0.93932400 | 1.52190700  |
| C | -5.18364900 | -1.23857200 | -0.61771700 |
| N | -4.53822500 | 4.04368200  | 2.96408100  |
| H | -4.75826100 | -0.40368500 | 1.93192500  |
| F | -6.15737900 | -2.10776900 | -0.27628100 |
| F | -4.93580600 | -1.40910600 | -1.93423300 |
| F | -5.69250100 | 0.00519600  | -0.45317400 |

iso\_Pro 5

0 1

|    |            |             |             |
|----|------------|-------------|-------------|
| C  | 2.10965000 | 2.54370100  | -2.43824100 |
| C  | 2.71226300 | 2.00890500  | -1.29537500 |
| C  | 3.05594400 | 0.61717300  | -1.23354600 |
| C  | 2.84038000 | -0.15219700 | -2.40800300 |
| C  | 2.25545600 | 0.39439400  | -3.55222000 |
| C  | 1.88211900 | 1.73523200  | -3.55365400 |
| H  | 1.41839200 | 2.17048200  | -4.43403900 |
| Pd | 1.19067600 | -0.33303000 | -0.37331000 |
| C  | 2.75843600 | -0.60726100 | 0.93016800  |
| C  | 4.78363400 | -1.10297900 | -0.26674100 |
| C  | 3.28416800 | -2.02446900 | 1.16438900  |
| C  | 3.80576900 | 0.06833400  | 0.00041600  |
| C  | 3.88970500 | -2.36701000 | -0.20604600 |
| H  | 4.48119700 | -3.28813600 | -0.18777000 |
| H  | 3.13519500 | -2.45800700 | -0.98960700 |
| C  | 5.60888700 | -1.28849300 | 1.02941500  |
| H  | 6.44375800 | -1.97353000 | 0.85184400  |
| H  | 6.03051700 | -0.34288400 | 1.38512500  |
| C  | 4.57465300 | -1.90270000 | 2.02642700  |
| H  | 4.88693000 | -2.89587500 | 2.36510000  |
| H  | 4.42138000 | -1.28968700 | 2.91685800  |
| H  | 3.18237300 | -1.17765500 | -2.43430600 |
| H  | 1.83491800 | 3.59046600  | -2.47128300 |
| H  | 4.30879100 | 0.90809300  | 0.48417700  |
| H  | 2.09942700 | -0.22600900 | -4.42827000 |
| H  | 2.54209800 | -2.71577700 | 1.56317400  |

|   |             |             |             |
|---|-------------|-------------|-------------|
| H | 5.38843900  | -0.96815900 | -1.16756200 |
| O | 3.03765700  | 2.73514700  | -0.21164300 |
| C | 2.61316600  | 4.09177700  | -0.12542600 |
| H | 1.52655200  | 4.16850900  | -0.24061100 |
| H | 2.90126400  | 4.42279300  | 0.87170800  |
| H | 3.11003400  | 4.70995200  | -0.88240500 |
| C | 2.21632100  | 0.14955300  | 2.09775300  |
| O | 1.93802100  | 1.34191300  | 2.11232200  |
| O | 1.97342300  | -0.65764600 | 3.15446100  |
| C | 1.38814600  | -0.03628700 | 4.31218800  |
| H | 1.42740600  | -0.79364900 | 5.09457900  |
| H | 1.95584300  | 0.85117700  | 4.59926300  |
| H | 0.35015000  | 0.24586000  | 4.11710500  |
| N | -0.53701000 | 0.30013300  | -1.60048700 |
| C | -1.23158600 | 1.40140200  | -1.15438800 |
| C | -1.11803300 | -0.47154400 | -2.49753600 |
| C | -2.52773500 | 1.67028200  | -1.67949600 |
| C | -0.68781900 | 2.24671100  | -0.15637100 |
| C | -2.41581000 | -0.17927100 | -3.01238700 |
| H | -0.60109800 | -1.36851800 | -2.81407400 |
| C | -3.25514900 | 2.78218300  | -1.19703600 |
| N | -3.10278900 | 0.86856900  | -2.62513600 |
| C | -1.41504000 | 3.31647800  | 0.30911700  |
| H | 0.29156300  | 2.02838100  | 0.25757500  |
| H | -2.86713100 | -0.86419900 | -3.72028900 |
| C | -2.70907900 | 3.59268000  | -0.21566800 |
| H | -4.24198200 | 2.96656000  | -1.60541500 |
| H | -1.01358900 | 3.95505800  | 1.08843700  |
| N | -0.29091300 | -1.28417400 | 0.76137000  |
| C | -0.86265700 | -2.31810300 | 0.11866500  |
| C | -1.04206000 | -0.51550800 | 1.57084200  |
| C | -2.23227000 | -2.54823300 | 0.16144000  |
| H | -0.22250400 | -2.93557300 | -0.50081900 |
| C | -2.40307900 | -0.74230300 | 1.72848700  |
| H | -0.54281800 | 0.31528400  | 2.05145900  |
| C | -3.02239100 | -1.75012800 | 0.98231700  |
| S | -2.91711600 | -3.68878800 | -1.08255900 |
| C | -3.19580600 | 0.21614800  | 2.57225100  |
| H | -4.09453100 | -1.91670300 | 1.01023800  |
| O | -2.08853600 | -4.90124600 | -0.93452100 |
| O | -4.34457900 | -3.78919200 | -0.73027100 |
| O | -2.62151600 | -2.90123500 | -2.32103900 |
| F | -4.29157300 | -0.35724800 | 3.09302200  |
| F | -2.45046300 | 0.70487300  | 3.59287200  |



|   |             |            |            |
|---|-------------|------------|------------|
| F | -3.60176500 | 1.28070500 | 1.83985200 |
| C | -3.44086700 | 4.71748700 | 0.28588800 |
| N | -4.01603600 | 5.63963000 | 0.69869200 |

Pre\_TS6

0 1

|    |             |             |             |
|----|-------------|-------------|-------------|
| C  | -3.15493200 | -0.50693800 | -3.10187800 |
| C  | -3.55626800 | -0.47437100 | -1.76291500 |
| C  | -3.33065700 | 0.69302300  | -0.95932900 |
| C  | -2.76553300 | 1.82198300  | -1.60520400 |
| C  | -2.38679100 | 1.78850200  | -2.94849800 |
| C  | -2.57444700 | 0.62233700  | -3.68435700 |
| H  | -2.27810700 | 0.58299300  | -4.72879300 |
| Pd | -1.30819600 | 0.26289100  | -0.04055500 |
| C  | -2.72421800 | 0.36978400  | 1.45189000  |
| C  | -4.27429500 | 2.15199400  | 0.99671400  |
| C  | -2.64148400 | 1.53634900  | 2.44086600  |
| C  | -3.88147400 | 0.74497600  | 0.48258500  |
| C  | -2.94793900 | 2.74104200  | 1.53661800  |
| H  | -3.11603900 | 3.65798600  | 2.11231300  |
| H  | -2.15381400 | 2.92642600  | 0.81295300  |
| C  | -5.04696400 | 1.93529900  | 2.31990200  |
| H  | -5.51755500 | 2.87012100  | 2.64046500  |
| H  | -5.84062800 | 1.18792100  | 2.21563000  |
| C  | -3.92824500 | 1.49360500  | 3.31646600  |
| H  | -3.82993500 | 2.20168300  | 4.14584100  |
| H  | -4.10712400 | 0.50808100  | 3.75108100  |
| H  | -2.63901100 | 2.73730700  | -1.04728000 |
| H  | -3.31721300 | -1.39523000 | -3.69976300 |
| H  | -4.71637800 | 0.04371100  | 0.54552600  |
| H  | -1.94764800 | 2.66853900  | -3.40639700 |
| H  | -1.71233100 | 1.57549200  | 3.00939500  |
| H  | -4.81560800 | 2.74664300  | 0.25534900  |
| O  | -4.20287600 | -1.48331800 | -1.15138800 |
| C  | -4.30551400 | -2.74345500 | -1.80255100 |
| H  | -3.31582600 | -3.11359800 | -2.09408400 |
| H  | -4.74625200 | -3.41580100 | -1.06722900 |
| H  | -4.95075900 | -2.68274300 | -2.68711900 |
| C  | -2.65071600 | -1.01781200 | 1.99521400  |
| O  | -2.88987200 | -2.05111900 | 1.38257000  |
| O  | -2.19504700 | -1.03424200 | 3.26991800  |
| C  | -2.07850700 | -2.32479400 | 3.89257800  |
| H  | -1.88250200 | -2.11819500 | 4.94455700  |
| H  | -3.00431000 | -2.89179700 | 3.77371600  |

|    |             |             |             |
|----|-------------|-------------|-------------|
| H  | -1.25037000 | -2.89214800 | 3.46249800  |
| O  | 1.42752300  | 4.20129000  | -1.39700600 |
| C  | 0.26297700  | 4.01093100  | -0.88518200 |
| O  | -0.05734400 | 3.03079700  | -0.17559700 |
| C  | -0.78097500 | 5.05831600  | -1.25063000 |
| H  | -1.60537000 | 5.05019200  | -0.53380100 |
| H  | -0.33038200 | 6.05256500  | -1.29364200 |
| H  | -1.18080200 | 4.83673600  | -2.24824200 |
| N  | 0.06738300  | -0.14871400 | -1.70934500 |
| C  | 0.38638500  | -1.45527900 | -1.97226300 |
| C  | 0.81434100  | 0.79268100  | -2.25473600 |
| C  | 1.53871000  | -1.75319300 | -2.75870700 |
| C  | -0.40332900 | -2.51013000 | -1.45041500 |
| C  | 1.93202200  | 0.47069800  | -3.07218700 |
| H  | 0.56011200  | 1.81698800  | -2.02036000 |
| C  | 1.90706700  | -3.10352000 | -2.96541600 |
| N  | 2.30331100  | -0.76707900 | -3.31097400 |
| C  | -0.02920100 | -3.81478300 | -1.66159300 |
| H  | -1.29142100 | -2.26867600 | -0.87444600 |
| H  | 2.52707700  | 1.27213300  | -3.50248700 |
| C  | 1.14143400  | -4.11793100 | -2.41628300 |
| H  | 2.79426500  | -3.31207600 | -3.55196700 |
| H  | -0.61500000 | -4.62897400 | -1.24938900 |
| N  | 0.29003000  | -0.33682400 | 1.18794900  |
| C  | 1.32466900  | 0.51223900  | 1.32541600  |
| C  | 0.45861400  | -1.64117100 | 1.46114000  |
| C  | 2.59032200  | 0.05374900  | 1.68468400  |
| H  | 1.12124800  | 1.55492700  | 1.09950400  |
| C  | 1.69001400  | -2.15446100 | 1.84857400  |
| H  | -0.41052800 | -2.27644100 | 1.35197400  |
| C  | 2.78647100  | -1.29714400 | 1.94884400  |
| S  | 3.98947600  | 1.20606700  | 1.68967700  |
| C  | 1.82917700  | -3.64092100 | 2.02769300  |
| H  | 3.77383800  | -1.65134800 | 2.22491900  |
| O  | 3.47242000  | 2.42804200  | 2.33124200  |
| O  | 5.09253700  | 0.47460600  | 2.31869000  |
| O  | 4.21459700  | 1.40634700  | 0.18457500  |
| F  | 2.86691900  | -3.95794400 | 2.81646500  |
| F  | 0.70924100  | -4.17929600 | 2.56898100  |
| F  | 2.01638200  | -4.25412200 | 0.83580400  |
| C  | 1.51147500  | -5.48862200 | -2.60805900 |
| N  | 1.79443400  | -6.60599300 | -2.75873100 |
| Ag | 2.88204500  | 2.87663700  | -0.61450000 |

TS6

0 1

|    |             |             |             |
|----|-------------|-------------|-------------|
| C  | -4.56757300 | -2.08361900 | -2.43385100 |
| C  | -4.61879900 | -1.82921100 | -1.06016900 |
| C  | -3.50901500 | -1.26557500 | -0.40244200 |
| C  | -2.35337800 | -0.93259300 | -1.14482600 |
| C  | -2.30615800 | -1.22858200 | -2.52761700 |
| C  | -3.40558200 | -1.78993300 | -3.16126300 |
| H  | -3.38045000 | -2.00114500 | -4.22680100 |
| Pd | -0.68370700 | -0.70603000 | 0.09278400  |
| C  | -2.03473000 | -1.00421000 | 1.63463800  |
| C  | -4.17802300 | 0.14264400  | 1.69169600  |
| C  | -2.10721800 | 0.18010900  | 2.61383100  |
| C  | -3.48686300 | -1.11628300 | 1.08580500  |
| C  | -3.01524400 | 1.14994200  | 1.82963100  |
| H  | -3.29466300 | 2.03808100  | 2.40742800  |
| H  | -2.57862100 | 1.46708800  | 0.88179800  |
| C  | -4.46315100 | -0.17400700 | 3.17501500  |
| H  | -5.07153500 | 0.61673800  | 3.62695200  |
| H  | -5.00398100 | -1.11788000 | 3.29640700  |
| C  | -3.03231900 | -0.20890100 | 3.80168800  |
| H  | -2.93215600 | 0.52426700  | 4.60886000  |
| H  | -2.77252600 | -1.18561700 | 4.21927400  |
| H  | -1.96332500 | 0.39358900  | -1.09073300 |
| H  | -5.41947000 | -2.51420700 | -2.94707400 |
| H  | -3.96579100 | -2.01139100 | 1.49755700  |
| H  | -1.41864800 | -0.96736500 | -3.09673300 |
| H  | -1.13686600 | 0.55976700  | 2.93212000  |
| H  | -5.05413600 | 0.46972300  | 1.12623100  |
| O  | -5.69749400 | -2.09968200 | -0.26969500 |
| C  | -6.81773200 | -2.74299000 | -0.85616200 |
| H  | -6.54066000 | -3.71361300 | -1.28697800 |
| H  | -7.53249800 | -2.89564200 | -0.04636300 |
| H  | -7.27760100 | -2.11906700 | -1.63367100 |
| C  | -1.47541500 | -2.30225400 | 2.11649500  |
| O  | -1.78704200 | -3.40892700 | 1.70665900  |
| O  | -0.51612000 | -2.13405900 | 3.07123600  |
| C  | 0.10276800  | -3.34015800 | 3.53627000  |
| H  | 0.80866300  | -3.02891700 | 4.30682800  |
| H  | -0.64217200 | -4.02451100 | 3.94965700  |
| H  | 0.62641900  | -3.84677500 | 2.71925200  |
| O  | -2.19025400 | 3.77366400  | -1.62508700 |
| C  | -2.49621300 | 2.55426500  | -1.60738100 |
| O  | -1.62060100 | 1.65459500  | -1.32096600 |

|    |             |             |             |
|----|-------------|-------------|-------------|
| C  | -3.91327200 | 2.12574100  | -1.89989000 |
| H  | -4.37167600 | 1.76429100  | -0.97255100 |
| H  | -4.49391000 | 2.96282400  | -2.28813100 |
| H  | -3.91722400 | 1.29129000  | -2.60752800 |
| N  | 0.87782500  | -0.55531600 | -1.47984800 |
| C  | 1.68414200  | -1.64723400 | -1.66942000 |
| C  | 1.33071400  | 0.62093900  | -1.87273500 |
| C  | 2.98466900  | -1.47339400 | -2.22957700 |
| C  | 1.24541000  | -2.93503700 | -1.27393600 |
| C  | 2.62848700  | 0.77137300  | -2.43145600 |
| H  | 0.68002300  | 1.47353900  | -1.72220000 |
| C  | 3.83082800  | -2.59709200 | -2.37243500 |
| N  | 3.44633800  | -0.24427000 | -2.59993700 |
| C  | 2.08330400  | -4.01424800 | -1.42110700 |
| H  | 0.24720900  | -3.04304000 | -0.85809200 |
| H  | 2.97866200  | 1.76478100  | -2.69818900 |
| C  | 3.38881300  | -3.84610300 | -1.97062300 |
| H  | 4.82138200  | -2.44828100 | -2.78582500 |
| H  | 1.76093600  | -5.00579600 | -1.12290000 |
| N  | 0.96428200  | -0.05299400 | 1.32089600  |
| C  | 1.04831900  | 1.28766700  | 1.26241200  |
| C  | 2.09060400  | -0.76886300 | 1.45579500  |
| C  | 2.26971400  | 1.95147900  | 1.22540100  |
| H  | 0.11491200  | 1.83412200  | 1.19547800  |
| C  | 3.34657700  | -0.16766700 | 1.47823400  |
| H  | 1.97560200  | -1.84409100 | 1.51200600  |
| C  | 3.44639800  | 1.21808900  | 1.33186500  |
| S  | 2.27905700  | 3.72090300  | 0.85503800  |
| C  | 4.57816100  | -1.03091100 | 1.52442600  |
| H  | 4.40538800  | 1.72449600  | 1.30308800  |
| O  | 1.10297400  | 4.26805700  | 1.56654700  |
| O  | 3.61929800  | 4.19879100  | 1.19869800  |
| O  | 2.01913800  | 3.70572500  | -0.65901500 |
| F  | 5.60454700  | -0.40269300 | 2.12146400  |
| F  | 4.34647500  | -2.18525700 | 2.18369300  |
| F  | 4.97732200  | -1.36075100 | 0.27330200  |
| C  | 4.24367500  | -4.98863700 | -2.10266800 |
| N  | 4.92679800  | -5.92368300 | -2.20472900 |
| Ag | -0.10846900 | 4.00093700  | -1.01935200 |

Pro 6

0 1

|   |             |             |             |
|---|-------------|-------------|-------------|
| C | -4.12715800 | -2.43937900 | -2.57631100 |
| C | -4.21719800 | -2.35367600 | -1.18080000 |

|    |             |             |             |
|----|-------------|-------------|-------------|
| C  | -3.11661000 | -1.91952700 | -0.41910200 |
| C  | -1.90414300 | -1.59279000 | -1.06094500 |
| C  | -1.82163100 | -1.68396400 | -2.46539200 |
| C  | -2.92807600 | -2.10174000 | -3.20915200 |
| H  | -2.85865600 | -2.17943600 | -4.29139400 |
| Pd | -0.44190400 | -0.92804800 | 0.12792700  |
| C  | -1.75080300 | -1.46419900 | 1.64079600  |
| C  | -4.06219700 | -0.71508300 | 1.67263600  |
| C  | -2.03736100 | -0.28802000 | 2.59600800  |
| C  | -3.15831400 | -1.83607900 | 1.07476200  |
| C  | -3.10000500 | 0.48625100  | 1.79044600  |
| H  | -3.53650200 | 1.32806100  | 2.34109900  |
| H  | -2.71407500 | 0.84481900  | 0.83276900  |
| C  | -4.28719500 | -1.05420000 | 3.16170200  |
| H  | -5.04061000 | -0.39024700 | 3.59983100  |
| H  | -4.63508500 | -2.08333300 | 3.29547500  |
| C  | -2.88133100 | -0.80256000 | 3.79355200  |
| H  | -2.92841600 | -0.04076100 | 4.57951400  |
| H  | -2.44760500 | -1.70143500 | 4.24098700  |
| H  | -1.94422400 | 0.40359900  | -1.54168400 |
| H  | -4.97135400 | -2.77004900 | -3.16972400 |
| H  | -3.48662400 | -2.80542700 | 1.46757700  |
| H  | -0.89098100 | -1.44718200 | -2.97385600 |
| H  | -1.14882100 | 0.26515600  | 2.89968700  |
| H  | -4.98593500 | -0.55962300 | 1.11055100  |
| O  | -5.34296400 | -2.66274700 | -0.46875400 |
| C  | -6.46455100 | -3.17036800 | -1.17153100 |
| H  | -6.21703800 | -4.09586700 | -1.70679900 |
| H  | -7.22237400 | -3.38015600 | -0.41510300 |
| H  | -6.85915800 | -2.43575500 | -1.88645900 |
| C  | -0.99759900 | -2.62843400 | 2.18296900  |
| O  | -1.17464600 | -3.80105600 | 1.89821200  |
| O  | -0.00774600 | -2.24693600 | 3.05174300  |
| C  | 0.79556400  | -3.31588100 | 3.56238800  |
| H  | 1.48467200  | -2.85399100 | 4.27088800  |
| H  | 0.17688600  | -4.06565700 | 4.06184300  |
| H  | 1.34989400  | -3.80520500 | 2.75451000  |
| O  | -3.10304700 | 3.22480000  | -1.40837000 |
| C  | -3.05393200 | 2.00816900  | -1.62097900 |
| O  | -1.88124100 | 1.39851400  | -1.52886500 |
| C  | -4.26026500 | 1.18248200  | -1.94586700 |
| H  | -4.50740200 | 0.57247500  | -1.06903400 |
| H  | -5.10104800 | 1.83166800  | -2.18917400 |
| H  | -4.04911500 | 0.48642600  | -2.76282600 |

|    |             |             |             |
|----|-------------|-------------|-------------|
| N  | 1.08567800  | -0.51095200 | -1.43528100 |
| C  | 2.06757400  | -1.45303500 | -1.61287100 |
| C  | 1.31643900  | 0.70669300  | -1.89200700 |
| C  | 3.29920300  | -1.08159900 | -2.22997500 |
| C  | 1.87364100  | -2.78027600 | -1.15691400 |
| C  | 2.54929200  | 1.05426700  | -2.50823500 |
| H  | 0.55077900  | 1.45812600  | -1.74915000 |
| C  | 4.32323900  | -2.04663200 | -2.36578800 |
| N  | 3.52663900  | 0.19002900  | -2.66951400 |
| C  | 2.88189900  | -3.70339300 | -1.29760800 |
| H  | 0.92129500  | -3.04033400 | -0.70263000 |
| H  | 2.70586000  | 2.08061100  | -2.82693600 |
| C  | 4.11990600  | -3.33515900 | -1.90189300 |
| H  | 5.25767800  | -1.74643400 | -2.82520800 |
| H  | 2.74580100  | -4.72293000 | -0.95398900 |
| N  | 1.03477900  | 0.18750900  | 1.34563700  |
| C  | 0.85594900  | 1.49991400  | 1.12531700  |
| C  | 2.27975800  | -0.27274200 | 1.52037600  |
| C  | 1.91961100  | 2.38182000  | 0.96790200  |
| H  | -0.17052900 | 1.83087100  | 1.02103000  |
| C  | 3.39598600  | 0.55860200  | 1.42737600  |
| H  | 2.37633600  | -1.33661300 | 1.70397400  |
| C  | 3.22052000  | 1.90740500  | 1.11743500  |
| S  | 1.60980600  | 4.02508900  | 0.28922400  |
| C  | 4.76588200  | -0.05393700 | 1.53689200  |
| H  | 4.06332900  | 2.57774000  | 0.98990600  |
| O  | 0.31425000  | 4.46245900  | 0.96793900  |
| O  | 2.77920000  | 4.84087600  | 0.61367800  |
| O  | 1.33516300  | 3.74874200  | -1.15384200 |
| F  | 5.71682500  | 0.87259300  | 1.73992100  |
| F  | 4.82218700  | -0.94742600 | 2.54575400  |
| F  | 5.08029400  | -0.72226600 | 0.40105200  |
| C  | 5.15685400  | -4.31632100 | -2.02748900 |
| N  | 5.99038300  | -5.12092700 | -2.12416500 |
| Ag | -1.29046400 | 4.04355500  | -0.45862400 |

Pre\_TS7

0 1

|   |            |             |             |
|---|------------|-------------|-------------|
| C | 4.35593100 | -3.95470700 | -0.17195100 |
| C | 4.80835500 | -2.65059900 | -0.40098400 |
| C | 3.90258400 | -1.57506400 | -0.41590300 |
| C | 2.53826800 | -1.81157400 | -0.19957500 |
| C | 2.08245200 | -3.12373700 | 0.01534500  |
| C | 2.99115700 | -4.18178300 | 0.02878300  |

|    |             |             |             |
|----|-------------|-------------|-------------|
| H  | 2.64095300  | -5.19884500 | 0.18955100  |
| Pd | 1.28865400  | -0.28238900 | -0.31840000 |
| C  | 3.05102100  | 0.75716800  | -0.74564300 |
| C  | 5.13986700  | 0.48713000  | 0.46692400  |
| C  | 3.29338600  | 1.79236800  | 0.37384000  |
| C  | 4.31579700  | -0.16358500 | -0.68250000 |
| C  | 4.03223100  | 0.94917000  | 1.43066300  |
| H  | 4.39978500  | 1.55164200  | 2.26799500  |
| H  | 3.43325700  | 0.12085600  | 1.81714200  |
| C  | 5.69680400  | 1.83405400  | -0.04196400 |
| H  | 6.44661400  | 2.23250100  | 0.65012600  |
| H  | 6.17467700  | 1.73071900  | -1.02185700 |
| C  | 4.43147600  | 2.74640000  | -0.08619200 |
| H  | 4.51621600  | 3.57873400  | 0.62161300  |
| H  | 4.24214200  | 3.17690600  | -1.07243400 |
| H  | 5.04525100  | -4.79063400 | -0.15956200 |
| H  | 4.87240200  | -0.10957700 | -1.62448600 |
| H  | 1.02118800  | -3.33247000 | 0.13996900  |
| H  | 2.40606800  | 2.31865000  | 0.72523200  |
| H  | 5.89596100  | -0.18679500 | 0.87224500  |
| O  | 6.11843200  | -2.32269600 | -0.63065400 |
| C  | 7.07049200  | -3.36935700 | -0.67294400 |
| H  | 6.83889100  | -4.09243600 | -1.46613400 |
| H  | 8.03045100  | -2.89497100 | -0.88495900 |
| H  | 7.13160900  | -3.89893200 | 0.28746900  |
| C  | 2.73945300  | 1.26715600  | -2.11261900 |
| O  | 3.07890600  | 0.76291300  | -3.16623000 |
| O  | 1.99500800  | 2.41746000  | -2.07302100 |
| C  | 1.53773400  | 2.89042600  | -3.34399600 |
| H  | 0.98437200  | 3.80764400  | -3.13529100 |
| H  | 2.37983200  | 3.09374600  | -4.00994000 |
| H  | 0.88487100  | 2.14961300  | -3.81595700 |
| C  | -0.07175100 | -1.38787000 | 2.11853600  |
| C  | -1.42875700 | -1.50572700 | 1.83502000  |
| C  | 0.40526100  | -0.12945000 | 2.50384500  |
| H  | 0.61168700  | -2.22398500 | 2.04031200  |
| C  | -2.32756200 | -0.44528500 | 1.92510300  |
| C  | -0.46848100 | 0.95936200  | 2.60751200  |
| H  | 1.45378600  | 0.00870500  | 2.73619600  |
| C  | -1.82780600 | 0.79744300  | 2.31640500  |
| H  | -3.37255700 | -0.54810800 | 1.66061100  |
| H  | -2.49866800 | 1.64621500  | 2.37609800  |
| I  | -2.16583800 | -3.45563900 | 1.20706800  |
| Ag | -3.51674900 | -2.30037900 | -0.91460100 |

|   |             |             |             |
|---|-------------|-------------|-------------|
| N | -0.33605200 | 1.17271100  | -0.64986500 |
| C | -1.47249300 | 0.61047100  | -1.08224500 |
| C | -0.34406700 | 2.48035300  | -0.34485600 |
| C | -2.66828300 | 1.31636400  | -1.19513200 |
| H | -1.41797500 | -0.43699600 | -1.35854400 |
| C | -1.48989700 | 3.25873300  | -0.46621500 |
| H | 0.59454600  | 2.90281700  | -0.01819000 |
| C | -2.68335300 | 2.67141400  | -0.89196200 |
| S | -4.20006400 | 0.44762200  | -1.58387100 |
| C | -1.46494200 | 4.72357100  | -0.13010500 |
| H | -3.59872400 | 3.24496000  | -0.99563000 |
| O | -5.08379500 | 1.41788000  | -2.22620200 |
| O | -3.74564900 | -0.71157000 | -2.46527100 |
| O | -4.64014600 | -0.10892200 | -0.26030500 |
| F | -2.31115600 | 5.00427500  | 0.88645800  |
| F | -0.23339900 | 5.13663400  | 0.23821400  |
| F | -1.85042100 | 5.47111000  | -1.18244000 |
| C | 0.11655400  | 2.27818900  | 2.97982800  |
| O | 1.28962300  | 2.44992000  | 3.24720200  |
| O | -0.79958400 | 3.26578400  | 2.96589500  |
| C | -0.31103600 | 4.56495100  | 3.34971200  |
| H | -1.15560100 | 5.23817200  | 3.21797200  |
| H | 0.02139100  | 4.54646500  | 4.39025200  |
| H | 0.51960000  | 4.86085700  | 2.70744600  |

TS7

0 1

|    |             |             |             |
|----|-------------|-------------|-------------|
| C  | -4.79266600 | -3.47865700 | -0.15155900 |
| C  | -4.70164400 | -2.43096100 | 0.76685900  |
| C  | -3.53401000 | -1.64604100 | 0.84618600  |
| C  | -2.44051400 | -1.92799900 | 0.01433000  |
| C  | -2.53589600 | -2.98741500 | -0.90499500 |
| C  | -3.70292100 | -3.74570300 | -0.98289700 |
| H  | -3.76356700 | -4.56773900 | -1.69173200 |
| Pd | -0.76097500 | -0.85734600 | 0.32498700  |
| C  | -2.00043000 | 0.13487100  | 1.73040500  |
| C  | -4.34469600 | 0.69907700  | 1.41140500  |
| C  | -2.26997500 | 1.58684500  | 1.27879600  |
| C  | -3.42887800 | -0.50045400 | 1.79602700  |
| C  | -3.48714400 | 1.40625300  | 0.35032400  |
| H  | -3.90345700 | 2.36189100  | 0.01211900  |
| H  | -3.27974600 | 0.77971900  | -0.51672400 |
| C  | -4.33322100 | 1.71775100  | 2.57030200  |
| H  | -5.12564200 | 2.46290000  | 2.44326000  |



|    |             |             |             |
|----|-------------|-------------|-------------|
| H  | -4.49265600 | 1.23136100  | 3.53853400  |
| C  | -2.92113900 | 2.36963700  | 2.45433100  |
| H  | -2.99547100 | 3.42804800  | 2.17964700  |
| H  | -2.33758400 | 2.31210000  | 3.37372200  |
| H  | -5.68604900 | -4.08734900 | -0.22209500 |
| H  | -3.65036000 | -0.83764400 | 2.81414500  |
| H  | -1.70638100 | -3.25685400 | -1.54746700 |
| H  | -1.41700800 | 2.10329900  | 0.83699300  |
| H  | -5.34088300 | 0.37920700  | 1.10479700  |
| O  | -5.69850200 | -2.08730600 | 1.63911800  |
| C  | -6.88665900 | -2.85927500 | 1.63293400  |
| H  | -6.68301700 | -3.91101100 | 1.87210800  |
| H  | -7.52765000 | -2.42969300 | 2.40465800  |
| H  | -7.39792000 | -2.80351300 | 0.66269100  |
| C  | -1.20701800 | -0.10148800 | 2.98088200  |
| O  | -1.25799500 | -1.10419500 | 3.66838700  |
| O  | -0.38178400 | 0.93953700  | 3.28816800  |
| C  | 0.51186200  | 0.72219600  | 4.38951300  |
| H  | 1.11497700  | 1.62810100  | 4.45251100  |
| H  | -0.04737200 | 0.56146600  | 5.31398200  |
| H  | 1.14388400  | -0.15058400 | 4.20094600  |
| C  | -1.76194800 | 0.07952000  | -2.55964400 |
| C  | -0.51643800 | 0.10437600  | -1.93065900 |
| C  | -2.29630400 | 1.29446500  | -2.97649900 |
| H  | -2.32602200 | -0.84006000 | -2.65150500 |
| C  | 0.26064300  | 1.25865200  | -1.83401000 |
| C  | -1.58639500 | 2.49170500  | -2.80727900 |
| H  | -3.28473100 | 1.33178300  | -3.42186300 |
| C  | -0.30394900 | 2.46505600  | -2.24506900 |
| H  | 1.26211900  | 1.23208100  | -1.42613400 |
| H  | 0.26021400  | 3.38451100  | -2.13796500 |
| I  | 0.70379500  | -1.92309200 | -2.09066100 |
| Ag | 3.33876500  | -1.37041400 | -1.61079900 |
| N  | 1.16597800  | 0.09275000  | 1.00532400  |
| C  | 2.24300300  | -0.70234100 | 1.11925000  |
| C  | 1.32685300  | 1.40884400  | 1.20934300  |
| C  | 3.52529500  | -0.19621500 | 1.33113000  |
| H  | 2.08783500  | -1.77061700 | 1.01276200  |
| C  | 2.55689800  | 1.97009200  | 1.54192700  |
| H  | 0.44952500  | 2.02701200  | 1.10062900  |
| C  | 3.69228800  | 1.16143500  | 1.57790600  |
| S  | 4.95037600  | -1.25514300 | 0.96437600  |
| C  | 2.62308900  | 3.43579100  | 1.87091900  |
| H  | 4.68130100  | 1.56555900  | 1.76546400  |

|   |             |             |             |
|---|-------------|-------------|-------------|
| O | 6.07239500  | -0.75765700 | 1.75941900  |
| O | 4.46492200  | -2.63252400 | 1.15202100  |
| O | 5.12956600  | -0.91291700 | -0.53442100 |
| F | 3.85367600  | 3.93817300  | 1.66770200  |
| F | 1.75216500  | 4.14592700  | 1.11991600  |
| F | 2.30207700  | 3.65533300  | 3.16597900  |
| C | -2.23732300 | 3.75412000  | -3.24659600 |
| O | -3.34310000 | 3.81403600  | -3.74712300 |
| O | -1.46076700 | 4.83477200  | -3.01966800 |
| C | -2.03362500 | 6.09144000  | -3.41449600 |
| H | -2.96491200 | 6.27238300  | -2.87188300 |
| H | -1.28695500 | 6.84407200  | -3.16202100 |
| H | -2.24054800 | 6.09554000  | -4.48763100 |

Pro 7

0 1

|    |             |             |             |
|----|-------------|-------------|-------------|
| C  | -4.80241000 | -2.61405400 | -1.75750300 |
| C  | -4.33117700 | -2.77952000 | -0.45328700 |
| C  | -3.14074000 | -2.14826600 | -0.03932300 |
| C  | -2.42082500 | -1.39173300 | -0.96958400 |
| C  | -2.88015600 | -1.21633900 | -2.27565600 |
| C  | -4.07118000 | -1.83234400 | -2.65592200 |
| H  | -4.44137800 | -1.70100400 | -3.66882400 |
| Pd | -0.72308100 | -0.59073200 | -0.26269500 |
| C  | -1.22814800 | -1.64492500 | 1.53669400  |
| C  | -3.43260300 | -1.73253100 | 2.53452500  |
| C  | -1.35230200 | -0.89039000 | 2.85491500  |
| C  | -2.61331500 | -2.33780800 | 1.35017700  |
| C  | -2.79079100 | -0.34833900 | 2.74603000  |
| H  | -3.12311000 | 0.12754700  | 3.67479300  |
| H  | -2.93052900 | 0.34857000  | 1.92475100  |
| C  | -2.97495200 | -2.46348800 | 3.81388200  |
| H  | -3.62049800 | -2.20467500 | 4.65919200  |
| H  | -3.00290700 | -3.55189900 | 3.69970100  |
| C  | -1.52745200 | -1.91714700 | 4.02211100  |
| H  | -1.43868700 | -1.37264500 | 4.96786100  |
| H  | -0.76727600 | -2.69689200 | 4.01974300  |
| H  | -5.72269200 | -3.08469000 | -2.08129700 |
| H  | -2.50834600 | -3.41798100 | 1.52761600  |
| H  | -2.33546800 | -0.60436700 | -2.98322300 |
| H  | -0.55582800 | -0.16843100 | 3.03472900  |
| H  | -4.50719100 | -1.75729300 | 2.35389100  |
| O  | -4.94945100 | -3.53662400 | 0.50277400  |
| C  | -6.14312200 | -4.21776500 | 0.14719600  |

|    |             |             |             |
|----|-------------|-------------|-------------|
| H  | -5.96942200 | -4.92600000 | -0.67260800 |
| H  | -6.45351500 | -4.76302300 | 1.03977900  |
| H  | -6.93330800 | -3.51405600 | -0.14374700 |
| C  | -0.06487400 | -2.53699900 | 1.23220600  |
| O  | 0.25081800  | -2.66975700 | 0.03599800  |
| O  | 0.60673400  | -3.09441100 | 2.21695500  |
| C  | 1.76023200  | -3.91771700 | 1.85764800  |
| H  | 2.06329300  | -4.38192100 | 2.79408100  |
| H  | 1.45967900  | -4.66741900 | 1.12454200  |
| H  | 2.56279300  | -3.29714800 | 1.45388000  |
| C  | -3.07144200 | 1.37828300  | -0.15540000 |
| C  | -1.68898000 | 1.18626000  | -0.27315200 |
| C  | -3.60691300 | 2.66343600  | -0.21119800 |
| H  | -3.74064300 | 0.53768400  | -0.03210100 |
| C  | -0.86343800 | 2.29614900  | -0.50221900 |
| C  | -2.77935400 | 3.77437200  | -0.40291300 |
| H  | -4.67601300 | 2.82020100  | -0.11260600 |
| C  | -1.40279700 | 3.58153200  | -0.55817800 |
| H  | 0.19860500  | 2.17149100  | -0.67152900 |
| H  | -0.75373700 | 4.43174600  | -0.73413200 |
| I  | 0.59819600  | -0.12089300 | -2.87096400 |
| Ag | 3.21031500  | -0.36856700 | -2.24493000 |
| N  | 1.14120500  | 0.15279000  | 0.81839300  |
| C  | 2.26636100  | -0.52406000 | 0.55644600  |
| C  | 1.21942300  | 1.24923500  | 1.59009600  |
| C  | 3.51964200  | -0.09676600 | 0.98233800  |
| H  | 2.16321900  | -1.43999300 | -0.01220100 |
| C  | 2.43193000  | 1.70784900  | 2.09957400  |
| H  | 0.29298200  | 1.77725800  | 1.77845500  |
| C  | 3.61631100  | 1.03777800  | 1.77573900  |
| S  | 4.95355100  | -0.99698700 | 0.33737400  |
| C  | 2.44172000  | 2.90124100  | 3.01774200  |
| H  | 4.58568400  | 1.38251300  | 2.11964600  |
| O  | 6.09574700  | -0.59398200 | 1.16077800  |
| O  | 4.51399600  | -2.40698600 | 0.36608700  |
| O  | 5.04337700  | -0.44350500 | -1.08751400 |
| F  | 3.60669800  | 3.56945000  | 2.94503500  |
| F  | 1.44530600  | 3.76040100  | 2.71536400  |
| F  | 2.26785800  | 2.52365600  | 4.30249800  |
| C  | -3.41093800 | 5.12005200  | -0.44875300 |
| O  | -4.60256400 | 5.32512100  | -0.32176700 |
| O  | -2.50716400 | 6.10510600  | -0.64713300 |
| C  | -3.05384700 | 7.43015000  | -0.70482700 |
| H  | -3.56043400 | 7.67635300  | 0.23208800  |

|   |             |            |             |
|---|-------------|------------|-------------|
| H | -2.20209800 | 8.09069600 | -0.86760900 |
| H | -3.76977000 | 7.51315800 | -1.52673500 |

Pre\_TS8

0 1

|    |             |             |             |
|----|-------------|-------------|-------------|
| C  | -3.04955000 | -4.54699600 | 1.04292600  |
| C  | -2.76233100 | -3.57877900 | 2.00893500  |
| C  | -2.00992700 | -2.43527700 | 1.67102200  |
| C  | -1.52823400 | -2.30973100 | 0.36687900  |
| C  | -1.79209600 | -3.27593600 | -0.60503700 |
| C  | -2.55765300 | -4.38755900 | -0.25443900 |
| H  | -2.77612300 | -5.14534600 | -1.00176500 |
| Pd | -0.40726000 | -0.68386100 | 0.02137500  |
| C  | -0.69873800 | -0.31265000 | 2.12142500  |
| C  | -2.79160600 | -0.56859100 | 3.33825600  |
| C  | -1.29960300 | 0.98986100  | 2.64237300  |
| C  | -1.64424500 | -1.41627000 | 2.70343300  |
| C  | -2.80656500 | 0.71038700  | 2.48148200  |
| H  | -3.42137500 | 1.50139500  | 2.92365000  |
| H  | -3.11631500 | 0.56005500  | 1.45070100  |
| C  | -2.25022600 | -0.01998500 | 4.67326600  |
| H  | -3.04857400 | 0.46385100  | 5.24505000  |
| H  | -1.82599200 | -0.80875000 | 5.30286400  |
| C  | -1.18323900 | 1.01658000  | 4.20355800  |
| H  | -1.43125000 | 2.02818100  | 4.53993600  |
| H  | -0.17774800 | 0.79305900  | 4.55639100  |
| H  | -3.63790700 | -5.42219900 | 1.28970900  |
| H  | -1.12424900 | -1.94279700 | 3.51670200  |
| H  | -1.41997000 | -3.17449400 | -1.61566600 |
| H  | -0.90571400 | 1.89473600  | 2.18774900  |
| H  | -3.72677100 | -1.12304000 | 3.41633500  |
| O  | -3.15643200 | -3.64925300 | 3.31337900  |
| C  | -3.89174000 | -4.79014800 | 3.73261600  |
| H  | -3.31619200 | -5.71193900 | 3.58281600  |
| H  | -4.08143100 | -4.64775200 | 4.79730600  |
| H  | -4.84711400 | -4.86724700 | 3.19856100  |
| C  | 0.74993500  | -0.65506200 | 2.28431300  |
| O  | 1.20275900  | -1.50040200 | 1.48447900  |
| O  | 1.46990800  | -0.03825800 | 3.18290100  |
| C  | 2.90443700  | -0.34801200 | 3.27956900  |
| H  | 3.38793500  | 0.58380500  | 3.56286500  |
| H  | 3.01765400  | -1.11297900 | 4.04986200  |
| H  | 3.29532000  | -0.68365700 | 2.32084900  |
| C  | -3.33490900 | -0.23333400 | -0.74381800 |

|   |             |             |             |
|---|-------------|-------------|-------------|
| C | -2.00385700 | 0.18876500  | -0.86305800 |
| C | -4.34026900 | 0.40397200  | -1.46942700 |
| H | -3.60020100 | -1.05327600 | -0.09067400 |
| C | -1.70089500 | 1.23776700  | -1.74392400 |
| C | -4.03962900 | 1.46599600  | -2.32838400 |
| H | -5.37319100 | 0.08473600  | -1.37746400 |
| C | -2.70995900 | 1.87671600  | -2.46558900 |
| H | -0.67490500 | 1.54473500  | -1.90262200 |
| H | -2.46164200 | 2.68821900  | -3.14031400 |
| C | -5.15935700 | 2.10796700  | -3.07044600 |
| O | -6.32286900 | 1.76843400  | -2.98200200 |
| O | -4.73711900 | 3.11813700  | -3.86034500 |
| C | -5.77004800 | 3.78680300  | -4.60059800 |
| H | -5.26261200 | 4.56305500  | -5.17316100 |
| H | -6.27858000 | 3.08450000  | -5.26610000 |
| H | -6.50394100 | 4.22547000  | -3.91976300 |
| N | 0.37982600  | -1.42061900 | -2.08383900 |
| C | 1.67669200  | -1.81441900 | -2.31311200 |
| C | -0.40113800 | -1.26828900 | -3.14014900 |
| C | 2.56235800  | -2.10209300 | -1.24872800 |
| C | 2.15215300  | -1.91710100 | -3.66328300 |
| C | 0.07454700  | -1.44422500 | -4.46253800 |
| H | -1.42893100 | -0.97735400 | -2.96426200 |
| C | 3.88789500  | -2.36990500 | -1.49915500 |
| H | 2.19829400  | -2.09222000 | -0.23119300 |
| C | 3.51155000  | -2.22257100 | -3.90259200 |
| N | 1.32878400  | -1.73128100 | -4.73076700 |
| H | -0.60697000 | -1.31361100 | -5.29978400 |
| C | 4.37082200  | -2.42796300 | -2.83751300 |
| H | 4.57687600  | -2.50459700 | -0.67481100 |
| H | 3.84970400  | -2.28685900 | -4.93011900 |
| C | 5.74854800  | -2.73648700 | -3.08406900 |
| N | 6.85872200  | -3.00892400 | -3.29375300 |
| N | 0.93612900  | 1.15809100  | -0.06900300 |
| C | 2.25675500  | 0.91037700  | 0.02516900  |
| C | 0.50484800  | 2.38642800  | 0.25394500  |
| C | 3.17536100  | 1.82824100  | 0.50929900  |
| H | 2.60640600  | -0.07319600 | -0.23960000 |
| C | 1.36631500  | 3.37520800  | 0.72601100  |
| H | -0.55697900 | 2.57419100  | 0.15123100  |
| C | 2.72199200  | 3.09172500  | 0.88436000  |
| S | 4.89689300  | 1.27961900  | 0.75687600  |
| C | 0.75999700  | 4.68240800  | 1.15386700  |
| H | 3.40824900  | 3.81735200  | 1.30717100  |

|     |             |             |             |
|-----|-------------|-------------|-------------|
| O   | 4.77279600  | -0.20070500 | 0.60058200  |
| O   | 5.65449600  | 1.96547000  | -0.30307600 |
| O   | 5.14943600  | 1.73026900  | 2.14625200  |
| F   | -0.05391600 | 5.18171500  | 0.19732000  |
| F   | -0.00534900 | 4.51305500  | 2.26235600  |
| F   | 1.68921300  | 5.60749200  | 1.43781000  |
| TS8 |             |             |             |
| 01  |             |             |             |
| C   | 3.18032600  | 4.28632100  | -1.10573500 |
| C   | 2.84194800  | 3.91213200  | 0.19956700  |
| C   | 2.12099600  | 2.72734100  | 0.43452500  |
| C   | 1.74358700  | 1.94432200  | -0.66645700 |
| C   | 2.06826800  | 2.31242600  | -1.97723600 |
| C   | 2.77711600  | 3.49208800  | -2.18476200 |
| H   | 3.03995100  | 3.79529700  | -3.19404300 |
| Pd  | 0.49544600  | 0.42376000  | -0.15154800 |
| C   | 0.38292900  | 1.44281400  | 1.70193700  |
| C   | 2.40419300  | 1.81986200  | 2.96719800  |
| C   | 0.49478700  | 0.59157800  | 2.96333800  |
| C   | 1.56017300  | 2.42453900  | 1.79265600  |
| C   | 2.00413700  | 0.32233400  | 3.01377200  |
| H   | 2.31686400  | -0.15065900 | 3.95064200  |
| H   | 2.34796800  | -0.29418400 | 2.18782400  |
| C   | 1.69803700  | 2.30638400  | 4.25297200  |
| H   | 2.26394200  | 2.00660000  | 5.14077800  |
| H   | 1.58926400  | 3.39463400  | 4.27984200  |
| C   | 0.32655400  | 1.55936800  | 4.18274600  |
| H   | 0.14026200  | 0.96597500  | 5.08268500  |
| H   | -0.52444200 | 2.23449600  | 4.06438500  |
| H   | 3.74615600  | 5.19090000  | -1.29264500 |
| H   | 1.16803300  | 3.38742800  | 2.14409900  |
| H   | 1.79026500  | 1.67819000  | -2.81218400 |
| H   | -0.17474300 | -0.26469100 | 2.99690500  |
| H   | 3.46906200  | 2.05569900  | 2.91663700  |
| O   | 3.14823600  | 4.63385100  | 1.31379400  |
| C   | 3.79244300  | 5.88985900  | 1.14781500  |
| H   | 3.19037100  | 6.56611600  | 0.52862000  |
| H   | 3.89476800  | 6.30687200  | 2.15040500  |
| H   | 4.78670200  | 5.77189500  | 0.69921900  |
| C   | -0.95662300 | 2.11232600  | 1.42109200  |
| O   | -1.08179500 | 3.13225700  | 0.76586600  |
| O   | -1.96873500 | 1.44794400  | 1.98688300  |
| C   | -3.31199300 | 1.96292100  | 1.77142500  |

|   |             |             |             |
|---|-------------|-------------|-------------|
| H | -3.98031700 | 1.19186400  | 2.15375500  |
| H | -3.42053600 | 2.91197500  | 2.30117800  |
| H | -3.48497000 | 2.11016900  | 0.70434000  |
| C | 3.62434700  | -0.07667600 | 0.24066200  |
| C | 2.46181700  | -0.16620700 | -0.52688000 |
| C | 4.70422600  | -0.90464100 | -0.05516300 |
| H | 3.71628200  | 0.64567000  | 1.03612700  |
| C | 2.43641400  | -0.97608800 | -1.66676100 |
| C | 4.65486500  | -1.78990100 | -1.13743200 |
| H | 5.60925300  | -0.85987900 | 0.54140000  |
| C | 3.52001700  | -1.80688700 | -1.95395900 |
| H | 1.59720200  | -0.94424100 | -2.34674300 |
| H | 3.48852700  | -2.45320500 | -2.82372200 |
| C | 5.84317900  | -2.64788600 | -1.39588300 |
| O | 6.85561900  | -2.63312000 | -0.72419600 |
| O | 5.67031300  | -3.45209100 | -2.46617800 |
| C | 6.78169900  | -4.30990200 | -2.77000500 |
| H | 6.47654200  | -4.88348500 | -3.64505300 |
| H | 7.67316700  | -3.71622000 | -2.98765300 |
| H | 6.99296600  | -4.97261600 | -1.92704800 |
| N | -0.69521100 | -0.25526000 | -2.26420300 |
| C | -1.77202600 | 0.57292700  | -2.45019200 |
| C | -0.85796000 | -1.52809300 | -2.58052100 |
| C | -1.68745000 | 1.94448200  | -2.10570800 |
| C | -3.01456100 | 0.03650900  | -2.91886100 |
| C | -2.07540000 | -2.02987300 | -3.10546500 |
| H | -0.02569600 | -2.20207000 | -2.39693100 |
| C | -2.80611500 | 2.73759400  | -2.18389200 |
| H | -0.74495000 | 2.35282600  | -1.76105800 |
| C | -4.15447300 | 0.86975700  | -2.98973300 |
| N | -3.13716400 | -1.27203800 | -3.26544900 |
| H | -2.15883700 | -3.08067000 | -3.37268800 |
| C | -4.05096300 | 2.19897800  | -2.62434300 |
| H | -2.75379400 | 3.78037600  | -1.89250100 |
| H | -5.09517400 | 0.42784700  | -3.29145200 |
| C | -5.19606100 | 3.05846400  | -2.67823800 |
| N | -6.10442000 | 3.78189800  | -2.73020900 |
| N | -0.84388500 | -1.11192500 | 0.54754400  |
| C | -2.16385600 | -0.91476200 | 0.40942700  |
| C | -0.40736600 | -2.28176800 | 1.04256000  |
| C | -3.11179000 | -1.85773000 | 0.77199000  |
| H | -2.49533800 | 0.01783600  | -0.02092600 |
| C | -1.29740100 | -3.29153900 | 1.40161200  |
| H | 0.66507800  | -2.39987100 | 1.14600300  |

|   |             |             |             |
|---|-------------|-------------|-------------|
| C | -2.67300700 | -3.08126200 | 1.27002900  |
| S | -4.86392800 | -1.37573500 | 0.64677100  |
| C | -0.74776300 | -4.61439700 | 1.86094400  |
| H | -3.39566100 | -3.84493700 | 1.53814700  |
| O | -4.82811300 | -0.37029100 | -0.45038900 |
| O | -5.55463200 | -2.64313100 | 0.35151300  |
| O | -5.10710300 | -0.79431500 | 1.99048000  |
| F | -0.47194100 | -5.41671200 | 0.80754700  |
| F | 0.40758200  | -4.45458400 | 2.54636800  |
| F | -1.61396400 | -5.26881100 | 2.65212200  |

Pro 8

0 1

|    |             |             |             |
|----|-------------|-------------|-------------|
| C  | -0.39824200 | -3.93518000 | -1.79828400 |
| C  | -0.70313200 | -3.66579000 | -0.46051700 |
| C  | -1.64504200 | -2.64176600 | -0.08366100 |
| C  | -2.36749600 | -2.01796800 | -1.15475000 |
| C  | -2.06236700 | -2.33620100 | -2.49053600 |
| C  | -1.07664700 | -3.26134400 | -2.80758300 |
| H  | -0.84915200 | -3.47920800 | -3.84685000 |
| Pd | -0.23713900 | -0.68298600 | -0.03887200 |
| C  | -0.77947900 | -1.26582500 | 1.87787800  |
| C  | -3.10090100 | -1.88943800 | 2.07132200  |
| C  | -1.61237200 | -0.32238900 | 2.74889900  |
| C  | -1.77525400 | -2.39932800 | 1.45137100  |
| C  | -2.97564800 | -0.35101400 | 2.04503700  |
| H  | -3.76394900 | 0.13691400  | 2.62798800  |
| H  | -2.95276200 | 0.08928300  | 1.05242200  |
| C  | -2.98829800 | -2.15048200 | 3.59472500  |
| H  | -3.96016900 | -1.99422400 | 4.07346700  |
| H  | -2.67507900 | -3.17587000 | 3.81635900  |
| C  | -1.94874200 | -1.08594400 | 4.06435900  |
| H  | -2.38781100 | -0.38909900 | 4.78585300  |
| H  | -1.06521400 | -1.52234700 | 4.53278700  |
| H  | 0.33773500  | -4.68947900 | -2.04638300 |
| H  | -1.49461300 | -3.34360300 | 1.91759700  |
| H  | -2.62778700 | -1.84762200 | -3.27679600 |
| H  | -1.15462500 | 0.65377900  | 2.90860900  |
| H  | -3.99608100 | -2.31782900 | 1.62341700  |
| O  | -0.17701700 | -4.37282800 | 0.55254000  |
| C  | 1.02357400  | -5.11235600 | 0.34663900  |
| H  | 1.78247900  | -4.48570100 | -0.13137900 |
| H  | 1.36489500  | -5.39609600 | 1.34094000  |
| H  | 0.83607500  | -6.00880700 | -0.25586900 |



|   |             |             |             |
|---|-------------|-------------|-------------|
| C | 0.59490400  | -1.62985500 | 2.38640400  |
| O | 1.31250000  | -2.50911300 | 1.92864200  |
| O | 1.00151100  | -0.80271200 | 3.36318900  |
| C | 2.33993100  | -1.01656600 | 3.88215800  |
| H | 2.40326700  | -0.36961700 | 4.75635900  |
| H | 2.46353400  | -2.06415700 | 4.16378600  |
| H | 3.09787200  | -0.73431100 | 3.14655300  |
| C | -4.78739200 | -1.54334900 | -0.66997900 |
| C | -3.51320300 | -1.06870600 | -1.00487600 |
| C | -5.86906200 | -0.67147000 | -0.59694300 |
| H | -4.92728300 | -2.60071700 | -0.46886300 |
| C | -3.36071100 | 0.28919200  | -1.32249300 |
| C | -5.70002100 | 0.68886600  | -0.87880300 |
| H | -6.85758700 | -1.02613600 | -0.32636200 |
| C | -4.43826400 | 1.16618300  | -1.25362800 |
| H | -2.37510500 | 0.66346800  | -1.58169800 |
| H | -4.30822600 | 2.21769300  | -1.48154500 |
| C | -6.89162000 | 1.57681900  | -0.77283200 |
| O | -8.00055400 | 1.19686500  | -0.45332000 |
| O | -6.60113200 | 2.86041000  | -1.07139700 |
| C | -7.70729100 | 3.77273200  | -0.98486400 |
| H | -7.30173900 | 4.74860500  | -1.25125400 |
| H | -8.49856100 | 3.47919500  | -1.67929700 |
| H | -8.11195900 | 3.78555200  | 0.03027400  |
| N | 0.76860600  | -0.38836700 | -2.11266400 |
| C | 2.12357100  | -0.58963300 | -2.13690500 |
| C | 0.23465100  | 0.32058900  | -3.09198200 |
| C | 2.76042100  | -1.38120600 | -1.14988000 |
| C | 2.91402300  | 0.05283000  | -3.14386100 |
| C | 1.02612500  | 0.88234600  | -4.12281700 |
| H | -0.83988000 | 0.46923400  | -3.07176700 |
| C | 4.13151500  | -1.44406000 | -1.09905400 |
| H | 2.15616500  | -1.89513500 | -0.40826500 |
| C | 4.32356300  | -0.04869200 | -3.09008500 |
| N | 2.33812400  | 0.77769400  | -4.14174100 |
| H | 0.55300100  | 1.44844500  | -4.92199200 |
| C | 4.92199300  | -0.76100100 | -2.06870400 |
| H | 4.62778300  | -1.97265200 | -0.29498800 |
| H | 4.90775300  | 0.46441400  | -3.84433800 |
| C | 6.34951700  | -0.85499000 | -2.00102600 |
| N | 7.50446300  | -0.97916700 | -1.98056300 |
| N | 0.82295800  | 0.99690000  | 0.61351900  |
| C | 2.11987700  | 0.80528600  | 0.91005900  |
| C | 0.35163700  | 2.25173300  | 0.51583200  |

|   |             |             |             |
|---|-------------|-------------|-------------|
| C | 3.02047600  | 1.84834800  | 1.04971600  |
| H | 2.46822700  | -0.20865600 | 1.02445100  |
| C | 1.18897700  | 3.35095800  | 0.69532400  |
| H | -0.70377600 | 2.36609000  | 0.30076700  |
| C | 2.54880300  | 3.15415800  | 0.94806700  |
| S | 4.78360100  | 1.41131900  | 1.20290900  |
| C | 0.61276600  | 4.73028600  | 0.52384200  |
| H | 3.22931500  | 3.98906400  | 1.07839300  |
| O | 5.23093600  | 1.52100200  | -0.20672100 |
| O | 5.31832600  | 2.41496000  | 2.13867400  |
| O | 4.71585100  | 0.00932300  | 1.70639600  |
| F | 0.57880500  | 5.08392700  | -0.78098100 |
| F | -0.66086900 | 4.78909400  | 0.97812900  |
| F | 1.33103800  | 5.65791600  | 1.17728600  |

TS9

0 1

|    |             |             |             |
|----|-------------|-------------|-------------|
| C  | -0.87843800 | -5.07118700 | -1.47103900 |
| C  | -0.46178500 | -4.03627400 | -0.62986800 |
| C  | -1.23690700 | -2.86105600 | -0.45552500 |
| C  | -2.45522000 | -2.75782300 | -1.18038800 |
| C  | -2.87709500 | -3.81500300 | -1.99811500 |
| C  | -2.09488400 | -4.95781400 | -2.14221200 |
| H  | -2.42454600 | -5.76297400 | -2.79194100 |
| Pd | -0.20895800 | -1.01839100 | -0.09001200 |
| C  | -0.53254100 | -1.30518100 | 1.94297300  |
| C  | -2.68354500 | -2.25482000 | 2.02100700  |
| C  | -1.52927400 | -0.42598900 | 2.69796900  |
| C  | -1.26503500 | -2.49332700 | 1.52994300  |
| C  | -2.83448800 | -0.71997800 | 1.94791600  |
| H  | -3.72211600 | -0.36614400 | 2.48080800  |
| H  | -2.84306300 | -0.31997700 | 0.93889600  |
| C  | -2.56054100 | -2.45140800 | 3.56918100  |
| H  | -3.56282100 | -2.49610800 | 4.00576600  |
| H  | -2.04728500 | -3.38218900 | 3.82951200  |
| C  | -1.78730400 | -1.17959400 | 4.03671700  |
| H  | -2.40150900 | -0.55976400 | 4.69724100  |
| H  | -0.86213500 | -1.41163800 | 4.57098200  |
| H  | -0.26947800 | -5.95810100 | -1.59825700 |
| H  | -0.78764500 | -3.44831000 | 1.71507000  |
| H  | -3.80459400 | -3.71136500 | -2.55268600 |
| H  | -1.23210100 | 0.61540500  | 2.80972500  |
| H  | -3.45177700 | -2.86683900 | 1.54997000  |
| O  | 0.67515100  | -4.08786900 | 0.10552300  |

|   |             |             |             |
|---|-------------|-------------|-------------|
| C | 1.48036900  | -5.25995900 | 0.09199100  |
| H | 1.91021500  | -5.43200800 | -0.90174300 |
| H | 2.27540900  | -5.06740700 | 0.81212800  |
| H | 0.90407100  | -6.13946400 | 0.40238900  |
| C | 0.87635000  | -1.42528300 | 2.45910700  |
| O | 1.56819800  | -2.42513300 | 2.37867900  |
| O | 1.26572000  | -0.26997600 | 3.02069400  |
| C | 2.62302500  | -0.17808700 | 3.52744400  |
| H | 2.55785200  | 0.42393600  | 4.43424700  |
| H | 3.00505100  | -1.17545600 | 3.74514100  |
| H | 3.24810500  | 0.33051400  | 2.78740000  |
| C | -4.61682500 | -1.53157900 | -0.72891600 |
| C | -3.28238600 | -1.52289000 | -1.16149500 |
| C | -5.32168600 | -0.33823100 | -0.58594300 |
| H | -5.07727300 | -2.47196300 | -0.44099700 |
| C | -2.72343000 | -0.30136300 | -1.56830500 |
| C | -4.71311400 | 0.88348500  | -0.89953300 |
| H | -6.33339600 | -0.32867000 | -0.19450500 |
| C | -3.42267600 | 0.89266600  | -1.43981800 |
| H | -1.72429800 | -0.29279700 | -1.97970700 |
| H | -2.96733000 | 1.83424800  | -1.72392200 |
| C | -5.43308700 | 2.15255600  | -0.59594500 |
| O | -6.58327000 | 2.22165200  | -0.21227300 |
| O | -4.62405900 | 3.21846000  | -0.75863900 |
| C | -5.18134900 | 4.49732700  | -0.42349000 |
| H | -4.36166500 | 5.20400500  | -0.54391400 |
| H | -6.01011900 | 4.74018200  | -1.09364500 |
| H | -5.54332000 | 4.49451800  | 0.60755300  |
| N | 0.98925700  | -0.88597700 | -2.03561900 |
| C | 2.32874700  | -0.93495900 | -1.73281500 |
| C | 0.63915100  | -0.19687900 | -3.10923600 |
| C | 2.79135400  | -1.70843100 | -0.63938400 |
| C | 3.24947400  | -0.11710500 | -2.46226800 |
| C | 1.58693500  | 0.50654500  | -3.89202200 |
| H | -0.41449100 | -0.16016900 | -3.36576800 |
| C | 4.09897400  | -1.59324300 | -0.23361100 |
| H | 2.09867900  | -2.35443700 | -0.11200800 |
| C | 4.58621500  | 0.00303300  | -2.01109700 |
| N | 2.85684700  | 0.58453800  | -3.55968900 |
| H | 1.26246600  | 1.04180800  | -4.78145300 |
| C | 4.99871400  | -0.71404100 | -0.90408500 |
| H | 4.45111500  | -2.14983800 | 0.62749300  |
| H | 5.24419500  | 0.69062900  | -2.52423100 |
| C | 6.34332300  | -0.60128900 | -0.42522300 |

|   |             |             |             |
|---|-------------|-------------|-------------|
| N | 7.44177700  | -0.56788300 | -0.04784900 |
| N | 0.44517400  | 0.95270000  | 0.24155800  |
| C | 1.74510800  | 1.23569900  | 0.41396900  |
| C | -0.43414700 | 1.96347300  | 0.15390900  |
| C | 2.23352000  | 2.53245900  | 0.44496900  |
| H | 2.42714900  | 0.40862400  | 0.53204400  |
| C | -0.02227900 | 3.29287000  | 0.19657500  |
| H | -1.47795100 | 1.69670400  | 0.05027300  |
| C | 1.33562400  | 3.59191100  | 0.33271300  |
| S | 4.04295800  | 2.72683000  | 0.52293800  |
| C | -1.08243600 | 4.35072500  | 0.05379400  |
| H | 1.69755300  | 4.61375700  | 0.36886700  |
| O | 4.41246600  | 2.69651700  | -0.91377200 |
| O | 4.22999000  | 4.01274100  | 1.21685700  |
| O | 4.45125700  | 1.50551000  | 1.27395100  |
| F | -1.68670600 | 4.27216400  | -1.16065900 |
| F | -2.06442200 | 4.19467600  | 0.97307300  |
| F | -0.58794900 | 5.59087100  | 0.18278400  |

Pro 9

0 1

|    |             |             |             |
|----|-------------|-------------|-------------|
| C  | -5.54692100 | 1.73202900  | -0.90641000 |
| C  | -4.58772400 | 0.70557200  | -0.90962800 |
| C  | -3.23683100 | 1.03414200  | -0.70455700 |
| C  | -2.89072500 | 2.38844600  | -0.60301000 |
| C  | -3.83770100 | 3.41584600  | -0.57691100 |
| C  | -5.17673500 | 3.06632700  | -0.71852100 |
| H  | -5.94562100 | 3.83301100  | -0.71744200 |
| Pd | -1.43516300 | 0.14618000  | -0.29847500 |
| C  | -1.51772600 | -1.95605200 | 0.68546200  |
| C  | -3.25418700 | -1.16467900 | 2.02271000  |
| C  | -1.13205500 | -1.95623700 | 2.15458300  |
| C  | -2.81287600 | -1.46761500 | 0.60699800  |
| C  | -1.92754500 | -0.74412400 | 2.68725200  |
| H  | -1.98200800 | -0.72353000 | 3.77991500  |
| H  | -1.56195000 | 0.22180900  | 2.32454600  |
| C  | -3.44577500 | -2.58848000 | 2.65183400  |
| H  | -3.90790000 | -2.49519300 | 3.63928500  |
| H  | -4.09352300 | -3.22393400 | 2.04116300  |
| C  | -1.98501800 | -3.12734200 | 2.75117900  |
| H  | -1.69001900 | -3.29741500 | 3.79071900  |
| H  | -1.82873400 | -4.06155600 | 2.20636800  |
| H  | -6.59310800 | 1.49713900  | -1.06213300 |
| H  | -3.49333000 | -1.68868000 | -0.20111000 |

|   |             |             |             |
|---|-------------|-------------|-------------|
| H | -3.52659800 | 4.45246000  | -0.48564200 |
| H | -0.06719200 | -2.01299900 | 2.36931700  |
| H | -4.10903500 | -0.49570600 | 2.12159000  |
| O | -4.91502600 | -0.60070800 | -1.13701900 |
| C | -6.26661200 | -0.93292800 | -1.41901100 |
| H | -6.62381200 | -0.41480300 | -2.31695300 |
| H | -6.27484500 | -2.00938500 | -1.59463100 |
| H | -6.92468000 | -0.69430500 | -0.57373100 |
| C | -0.92063000 | -2.83378200 | -0.37191600 |
| O | -1.36201800 | -2.91694600 | -1.50230500 |
| O | 0.14906900  | -3.48045800 | 0.09230800  |
| C | 0.86977500  | -4.31505600 | -0.85976300 |
| H | 1.82945500  | -4.52114700 | -0.39264900 |
| H | 0.29274300  | -5.22495300 | -1.04076500 |
| H | 1.03239500  | -3.77067300 | -1.79021600 |
| C | -0.72103800 | 3.32613800  | 0.39126100  |
| C | -1.41641200 | 2.59411200  | -0.59837700 |
| C | 0.65677600  | 3.43099600  | 0.33652100  |
| H | -1.28157700 | 3.77970100  | 1.20288500  |
| C | -0.67678600 | 2.00847300  | -1.66602500 |
| C | 1.39009500  | 2.81232200  | -0.69976700 |
| H | 1.21347400  | 3.95478800  | 1.10598000  |
| C | 0.72696500  | 2.12957100  | -1.70904700 |
| H | -1.21031100 | 1.60070300  | -2.52007800 |
| H | 1.28985500  | 1.66899500  | -2.51233100 |
| C | 2.88416200  | 2.85585300  | -0.61186700 |
| O | 3.47824200  | 3.47354900  | 0.25081400  |
| O | 3.45292500  | 2.09090400  | -1.54709300 |
| C | 4.89167800  | 1.93691000  | -1.49313700 |
| H | 5.09305200  | 0.96929100  | -1.95194900 |
| H | 5.35728700  | 2.75952600  | -2.04242500 |
| H | 5.22096100  | 1.95988800  | -0.45298600 |
| N | 0.61956000  | -0.23590300 | 0.14840800  |
| C | 1.39249700  | -0.89284100 | -0.73589100 |
| C | 1.18817900  | 0.33752300  | 1.21863600  |
| C | 2.76019700  | -1.03860900 | -0.55792400 |
| H | 0.91621400  | -1.30811500 | -1.61612500 |
| C | 2.56326800  | 0.28204300  | 1.43140200  |
| H | 0.53618000  | 0.87618100  | 1.89304900  |
| C | 3.36219300  | -0.43284900 | 0.54244100  |
| S | 3.70897300  | -2.06015500 | -1.72707900 |
| C | 3.14857000  | 0.98148800  | 2.62775700  |
| H | 4.43659100  | -0.50045100 | 0.67494600  |
| O | 2.75674600  | -2.23666100 | -2.85058700 |

|   |            |             |             |
|---|------------|-------------|-------------|
| O | 4.90010000 | -1.22674900 | -2.00953500 |
| O | 3.96849500 | -3.27458500 | -0.91945000 |
| F | 2.42838800 | 2.08223000  | 2.94754700  |
| F | 3.14520800 | 0.18107100  | 3.71719300  |
| F | 4.41734200 | 1.35991300  | 2.40536600  |

iso\_Pre\_TS10

0 1

|    |             |             |             |
|----|-------------|-------------|-------------|
| C  | 0.07843000  | 5.24206400  | -0.77676700 |
| C  | -0.26944900 | 3.99119100  | -0.25101500 |
| C  | 0.63734100  | 2.91217200  | -0.28857800 |
| C  | 1.90733400  | 3.11786700  | -0.87220300 |
| C  | 2.25680100  | 4.37716900  | -1.38597100 |
| C  | 1.34080200  | 5.42285600  | -1.34444400 |
| H  | 1.60641100  | 6.39412600  | -1.75104700 |
| Pd | 0.13382000  | 1.06913400  | 0.38488400  |
| H  | -0.61805500 | 6.07151700  | -0.74352100 |
| H  | 3.23842200  | 4.51862100  | -1.82798800 |
| O  | -1.47102600 | 3.73583100  | 0.34535800  |
| C  | -2.47359100 | 4.74275600  | 0.32941400  |
| H  | -2.71236800 | 5.04902300  | -0.69637500 |
| H  | -3.35299200 | 4.28699700  | 0.78611500  |
| H  | -2.16983200 | 5.62114600  | 0.91199000  |
| C  | 4.12541000  | 2.16750200  | -0.18673100 |
| C  | 2.90502200  | 2.01369100  | -0.86355600 |
| C  | 4.97698200  | 1.08048500  | -0.00514400 |
| H  | 4.37349000  | 3.13325900  | 0.24432300  |
| C  | 2.61083300  | 0.76624800  | -1.43396600 |
| C  | 4.63125900  | -0.17817800 | -0.51173200 |
| H  | 5.90448700  | 1.17881300  | 0.54979700  |
| C  | 3.45936300  | -0.32185100 | -1.26362200 |
| H  | 1.70220200  | 0.64276500  | -2.01049600 |
| H  | 3.20200800  | -1.28957700 | -1.67715400 |
| C  | 5.50241000  | -1.34246300 | -0.18730900 |
| O  | 6.52911700  | -1.27313900 | 0.45988700  |
| O  | 4.99002300  | -2.49114700 | -0.66687400 |
| C  | 5.70966700  | -3.68864500 | -0.33921400 |
| H  | 5.11272500  | -4.50210600 | -0.74831500 |
| H  | 6.70619100  | -3.66857900 | -0.78760700 |
| H  | 5.80514400  | -3.78847600 | 0.74462800  |
| N  | -1.43611000 | 1.05484900  | -0.95388400 |
| C  | -2.73428000 | 0.94378500  | -0.52618500 |
| C  | -1.18756900 | 0.88080400  | -2.24689400 |
| C  | -3.09601100 | 1.20476900  | 0.81782800  |

|   |             |             |             |
|---|-------------|-------------|-------------|
| C | -3.72798600 | 0.49399900  | -1.45285800 |
| C | -2.21490500 | 0.54553900  | -3.15369400 |
| H | -0.16532000 | 0.99910400  | -2.57993600 |
| C | -4.37095700 | 0.93007800  | 1.24261600  |
| H | -2.34300600 | 1.59639000  | 1.49259200  |
| C | -5.03160000 | 0.19812800  | -0.98359600 |
| N | -3.45440900 | 0.32663600  | -2.76947000 |
| H | -1.98178700 | 0.43235300  | -4.20931300 |
| C | -5.34304100 | 0.39684500  | 0.34430800  |
| H | -4.65099600 | 1.09144100  | 2.27730600  |
| H | -5.74567200 | -0.20843400 | -1.68753700 |
| C | -6.65281900 | 0.09570500  | 0.83697500  |
| N | -7.72302700 | -0.10201600 | 1.24439100  |
| N | -0.21304100 | -1.03482400 | 0.79888900  |
| C | -1.46017500 | -1.51903900 | 0.90331600  |
| C | 0.77133700  | -1.87533500 | 0.43147900  |
| C | -1.81161700 | -2.80132000 | 0.50853300  |
| H | -2.22769900 | -0.85894800 | 1.27468400  |
| C | 0.51311700  | -3.20585400 | 0.10889400  |
| H | 1.77159500  | -1.46192400 | 0.38720200  |
| C | -0.80496500 | -3.67320500 | 0.10394700  |
| S | -3.59536700 | -3.11976100 | 0.30810700  |
| C | 1.67233500  | -4.06817000 | -0.30842100 |
| H | -1.05625400 | -4.68347000 | -0.20092000 |
| O | -3.81629100 | -2.49184100 | -1.02559900 |
| O | -3.71696200 | -4.58698700 | 0.35277800  |
| O | -4.20068900 | -2.35893600 | 1.42983600  |
| F | 2.19920100  | -3.64838300 | -1.48849300 |
| F | 2.67767200  | -4.01489300 | 0.59736400  |
| F | 1.32251800  | -5.35499700 | -0.46070900 |
| O | 1.67869500  | 0.90161600  | 1.79155600  |
| C | 2.24888100  | 1.78260700  | 2.45250300  |
| O | 2.00566200  | 3.06826700  | 2.32087300  |
| H | 1.39164700  | 3.20001500  | 1.54946100  |
| C | 3.30602600  | 1.43219500  | 3.45210300  |
| H | 4.25617900  | 1.33528800  | 2.91423700  |
| H | 3.40565300  | 2.21350300  | 4.20706900  |
| H | 3.07500800  | 0.46943100  | 3.91086500  |

Pre\_TS10

01

|   |             |             |            |
|---|-------------|-------------|------------|
| C | -0.80472300 | -1.44591900 | 4.06358500 |
| C | -0.76154300 | -1.58735400 | 2.67375700 |
| C | 0.34926700  | -1.14105700 | 1.92473800 |

|    |             |             |             |
|----|-------------|-------------|-------------|
| C  | 1.40419800  | -0.50757300 | 2.61009200  |
| C  | 1.35205600  | -0.34576200 | 4.00664500  |
| C  | 0.26031400  | -0.82333200 | 4.72111900  |
| H  | 0.22749100  | -0.71361700 | 5.80106000  |
| Pd | 0.32009200  | -1.31119700 | -0.08492600 |
| H  | -1.65525100 | -1.80207500 | 4.63311700  |
| H  | 2.17706400  | 0.14072900  | 4.51816200  |
| O  | -1.77924400 | -2.12020300 | 1.93304800  |
| C  | -3.00067400 | -2.46155000 | 2.57930700  |
| H  | -3.39579400 | -1.60888500 | 3.14605900  |
| H  | -3.68981800 | -2.71103700 | 1.77288900  |
| H  | -2.86763600 | -3.31485700 | 3.25607200  |
| C  | 2.81928000  | 1.43792800  | 1.94267700  |
| C  | 2.53526200  | 0.06769500  | 1.83877000  |
| C  | 3.76034500  | 2.03129800  | 1.10844000  |
| H  | 2.25168400  | 2.04477200  | 2.64177700  |
| C  | 3.27337400  | -0.70803300 | 0.92966800  |
| C  | 4.46007100  | 1.25740500  | 0.17341100  |
| H  | 3.94559300  | 3.09934700  | 1.14245400  |
| C  | 4.23200500  | -0.12386400 | 0.10813900  |
| H  | 3.08973900  | -1.77529900 | 0.86055200  |
| H  | 4.78583200  | -0.72685800 | -0.60188200 |
| C  | 5.38449500  | 1.95653300  | -0.75875700 |
| O  | 5.47987400  | 3.16612300  | -0.84684200 |
| O  | 6.09397400  | 1.09830100  | -1.52078900 |
| C  | 6.98109800  | 1.71165900  | -2.46912100 |
| H  | 7.46189500  | 0.88646400  | -2.99403800 |
| H  | 6.41995800  | 2.33894900  | -3.16657600 |
| H  | 7.72220800  | 2.32817800  | -1.95427100 |
| N  | 0.38943700  | 0.72488100  | -0.32385000 |
| C  | -0.42922100 | 1.62336100  | 0.31425100  |
| C  | 1.33229300  | 1.19104100  | -1.12770000 |
| C  | -1.53815300 | 1.19323600  | 1.07811100  |
| C  | -0.17249900 | 3.01928200  | 0.15645100  |
| C  | 1.55502000  | 2.58410500  | -1.26338100 |
| H  | 1.93045600  | 0.46469300  | -1.66040100 |
| C  | -2.34140400 | 2.11874000  | 1.69642500  |
| H  | -1.76130300 | 0.13676200  | 1.13268100  |
| C  | -1.00406100 | 3.95497500  | 0.81527400  |
| N  | 0.84032200  | 3.48364500  | -0.62605500 |
| H  | 2.36623800  | 2.93525400  | -1.89517700 |
| C  | -2.06996300 | 3.51182000  | 1.57672900  |
| H  | -3.20520100 | 1.79874600  | 2.26762300  |
| H  | -0.79125400 | 5.00968900  | 0.68749800  |



|   |             |             |             |
|---|-------------|-------------|-------------|
| C | -2.92884900 | 4.45032400  | 2.23520700  |
| N | -3.63220300 | 5.19889200  | 2.77957000  |
| O | 0.21957200  | -3.38691600 | -0.06216100 |
| C | 0.72014600  | -4.22690700 | 0.69137000  |
| O | 1.33257600  | -3.92907300 | 1.82455800  |
| H | 1.21874200  | -2.95846300 | 1.99740700  |
| C | 0.66188200  | -5.68771700 | 0.36830800  |
| H | 1.65654000  | -6.13120000 | 0.47185400  |
| H | 0.00003700  | -6.18948300 | 1.08286100  |
| H | 0.28487400  | -5.81787900 | -0.64598400 |
| O | 0.51031200  | -1.40993800 | -2.19569800 |
| S | -0.66265400 | -1.91629300 | -3.06570300 |
| C | -2.08624800 | -1.25751300 | -2.17016100 |
| O | -0.80232800 | -3.37787400 | -3.02592500 |
| O | -0.64106600 | -1.23689200 | -4.36632300 |
| C | -2.81707600 | -2.06242300 | -1.29307800 |
| C | -2.41778200 | 0.08653900  | -2.29541500 |
| N | -3.82930100 | -1.59695200 | -0.54845300 |
| H | -2.56231500 | -3.11233000 | -1.19297200 |
| C | -3.45514300 | 0.57941200  | -1.50645800 |
| H | -1.86491600 | 0.72364200  | -2.97770500 |
| C | -4.13132700 | -0.29876500 | -0.65505300 |
| C | -3.82685200 | 2.03189200  | -1.57749400 |
| H | -4.94047800 | 0.06456800  | -0.02776600 |
| F | -2.71966500 | 2.81216500  | -1.65955500 |
| F | -4.58367900 | 2.31278400  | -2.65562700 |
| F | -4.51741200 | 2.42922500  | -0.48482000 |

TS10

0 1

|    |             |             |            |
|----|-------------|-------------|------------|
| C  | -0.11598500 | 2.10244700  | 3.12010500 |
| C  | 0.06534600  | 0.82414800  | 2.58781800 |
| C  | 1.18419700  | 0.50047300  | 1.77127600 |
| C  | 2.17749100  | 1.50395300  | 1.55266000 |
| C  | 1.96057000  | 2.79468800  | 2.05724100 |
| C  | 0.82694000  | 3.08279500  | 2.81504500 |
| H  | 0.67995500  | 4.09206000  | 3.18942900 |
| Pd | 0.52792200  | -0.67426000 | 0.11992100 |
| H  | -0.97371600 | 2.34662100  | 3.73435100 |
| H  | 2.66930100  | 3.58894200  | 1.85519800 |
| O  | -0.80650100 | -0.19676100 | 2.78892900 |
| C  | -1.92228000 | -0.00247400 | 3.65597000 |
| H  | -2.56978200 | 0.80191000  | 3.28489700 |
| H  | -2.46698700 | -0.94531000 | 3.63227300 |

|   |             |             |             |
|---|-------------|-------------|-------------|
| H | -1.59015100 | 0.23397100  | 4.67329900  |
| C | 4.60293900  | 1.98612200  | 1.13253900  |
| C | 3.46272800  | 1.20007400  | 0.86652000  |
| C | 5.81921500  | 1.73139100  | 0.51375400  |
| H | 4.55012300  | 2.78623500  | 1.86160700  |
| C | 3.62037600  | 0.12323200  | -0.02650000 |
| C | 5.94653200  | 0.67105700  | -0.39075000 |
| H | 6.69131200  | 2.33964300  | 0.72769000  |
| C | 4.83535000  | -0.13908600 | -0.64906700 |
| H | 2.77790100  | -0.52653000 | -0.24642400 |
| H | 4.92253700  | -0.97230100 | -1.33675200 |
| C | 7.27224800  | 0.44687600  | -1.02912400 |
| O | 8.25652000  | 1.12937800  | -0.82137700 |
| O | 7.26191000  | -0.60589000 | -1.87373000 |
| C | 8.51273000  | -0.88132700 | -2.52194600 |
| H | 8.32774200  | -1.74825200 | -3.15605700 |
| H | 8.82927100  | -0.02367200 | -3.12118200 |
| H | 9.28588600  | -1.10132600 | -1.78129400 |
| N | 0.11047300  | 1.08332000  | -0.86685200 |
| C | -1.10533100 | 1.70694900  | -0.75078600 |
| C | 0.98312600  | 1.56147500  | -1.73611300 |
| C | -2.08963100 | 1.22990300  | 0.14495200  |
| C | -1.37685800 | 2.84931000  | -1.56580500 |
| C | 0.68623900  | 2.70294500  | -2.52149200 |
| H | 1.93674300  | 1.05521000  | -1.82018800 |
| C | -3.30153200 | 1.86894200  | 0.22744500  |
| H | -1.87827400 | 0.35109200  | 0.74075600  |
| C | -2.63726200 | 3.48518100  | -1.47113600 |
| N | -0.46040400 | 3.33990600  | -2.44541300 |
| H | 1.42901800  | 3.07593900  | -3.22187200 |
| C | -3.58683900 | 2.99876100  | -0.59102200 |
| H | -4.07263600 | 1.50129100  | 0.89188900  |
| H | -2.83087700 | 4.34074200  | -2.10726200 |
| C | -4.87760900 | 3.61356800  | -0.50013400 |
| N | -5.92659400 | 4.10608000  | -0.41256900 |
| O | 0.87037700  | -2.48624400 | 0.96965600  |
| C | 1.60002500  | -2.67223800 | 1.99203800  |
| O | 2.17081700  | -1.74956600 | 2.65222900  |
| H | 1.72619500  | -0.64309000 | 2.18480100  |
| C | 1.76640300  | -4.09892200 | 2.45465300  |
| H | 2.79456800  | -4.26680600 | 2.78363000  |
| H | 1.10685900  | -4.26513000 | 3.31419300  |
| H | 1.49333800  | -4.78755900 | 1.65433000  |
| O | -0.13140900 | -1.52670200 | -1.66180800 |

|   |             |             |             |
|---|-------------|-------------|-------------|
| S | -1.09002300 | -2.74356100 | -1.77714700 |
| C | -2.43198600 | -2.28359900 | -0.66140000 |
| O | -0.51343800 | -3.97780400 | -1.23885800 |
| O | -1.66713900 | -2.74663300 | -3.12621800 |
| C | -2.36079300 | -2.57917000 | 0.70338600  |
| C | -3.52625500 | -1.58336700 | -1.15318600 |
| N | -3.30261100 | -2.19914800 | 1.57750500  |
| H | -1.50966200 | -3.12669300 | 1.09322700  |
| C | -4.50800600 | -1.18669400 | -0.24516500 |
| H | -3.59083500 | -1.35036600 | -2.21047900 |
| C | -4.35247100 | -1.51779300 | 1.10258200  |
| C | -5.70228400 | -0.39995200 | -0.70651200 |
| H | -5.09843300 | -1.21027300 | 1.83055500  |
| F | -5.37417700 | 0.44251000  | -1.71226600 |
| F | -6.69688700 | -1.18888300 | -1.15151200 |
| F | -6.20922000 | 0.35739800  | 0.29944600  |

(AgI)<sub>2</sub>

0 1

|    |             |             |            |
|----|-------------|-------------|------------|
| Ag | -0.00022100 | -1.43509900 | 0.00000000 |
| I  | -2.42888000 | 0.00012500  | 0.00000000 |
| Ag | 0.00000000  | 1.43501800  | 0.00000000 |
| I  | 2.42907600  | -0.00005300 | 0.00000000 |

ArI

0 1

|   |             |             |             |
|---|-------------|-------------|-------------|
| C | 0.08013900  | -1.13505700 | -0.00010200 |
| C | -1.31102700 | -1.05111900 | -0.00006100 |
| C | -1.94310400 | 0.19802300  | 0.00007200  |
| C | -1.17233700 | 1.36635400  | 0.00016500  |
| C | 0.21822600  | 1.29611600  | 0.00012600  |
| C | 0.82840300  | 0.04170400  | -0.00000700 |
| H | 0.56905900  | -2.10237600 | -0.00020500 |
| H | -1.90844200 | -1.95533900 | -0.00013200 |
| H | -1.67947000 | 2.32518100  | 0.00026500  |
| H | 0.81282200  | 2.20228200  | 0.00019900  |
| I | 2.97269800  | -0.08087900 | -0.00006800 |
| C | -3.42407700 | 0.34294200  | 0.00011300  |
| O | -4.00945600 | 1.40812600  | 0.00028800  |
| O | -4.05727000 | -0.85084900 | -0.00001900 |
| C | -5.49035200 | -0.77921800 | -0.00005500 |
| H | -5.84694000 | -0.25223300 | -0.88890800 |
| H | -5.83436800 | -1.81360600 | -0.00107400 |
| H | -5.84704600 | -0.25400900 | 0.88982000  |

NBE-CO<sub>2</sub>Me

0 1

|   |             |             |             |
|---|-------------|-------------|-------------|
| C | 1.77926300  | 1.09918600  | -0.86669100 |
| C | 1.06069100  | 0.92599100  | 0.51139000  |
| C | 2.00329200  | -1.10142200 | 0.18351300  |
| C | 2.42685300  | -0.30002600 | -1.09906800 |
| H | 1.07575300  | 1.38287700  | -1.65370500 |
| H | 2.54142300  | 1.88268400  | -0.80123900 |
| H | 2.07935000  | -0.78520900 | -2.01535400 |
| H | 3.51869200  | -0.23233700 | -1.15115800 |
| C | 2.07379200  | 0.02106500  | 1.24853100  |
| H | 1.72111100  | -0.30280800 | 2.23235000  |
| H | 3.07087400  | 0.46671100  | 1.34083800  |
| C | -0.06103300 | -0.07284000 | 0.27285000  |
| C | 0.50251000  | -1.28057900 | 0.07648100  |
| H | -0.00660800 | -2.18827300 | -0.22699800 |
| H | 0.75915400  | 1.85833500  | 0.98824200  |
| H | 2.58627500  | -2.00724200 | 0.36100900  |
| C | -1.46561200 | 0.32063600  | 0.11070000  |
| O | -1.86221800 | 1.47185000  | 0.13048800  |
| O | -2.28620300 | -0.74509100 | -0.06437700 |
| C | -3.67099200 | -0.41869000 | -0.23339200 |
| H | -4.18471300 | -1.37305700 | -0.35403800 |
| H | -4.05156200 | 0.11465300  | 0.64217100  |
| H | -3.81495700 | 0.20967000  | -1.11689000 |
